# Supplementary material for: Simple and efficient one-pot multi-step strategy for the synthesis of 2-substituted (1,2,5-triarylpyrrolo[3,2-c]pyridin-3-yl)-N-arylacetamide derivatives in water
Source: Royal Society of Chemistry journal article supplement (doi:10.1039/d1ob00190f), 2021-01-01

Electronic Supplementary Material (ESI) for Organic & Biomolecular Chemistry.

This journal is © The Royal Society of Chemistry 2015

## Organic & Biomolecular Chemistry

### Simple and Efficient one-pot multi-step strategy for synthesis of 2-substituted (1,2,5-triarylpyrrolo[3,2-c]pyridin-3-yl)-*N*- arylacetamide derivatives in water

Chunmei Li,<sup>a,b</sup> Xiaopeng Yang,<sup>a</sup> Furen Zhang,<sup>\*a</sup> Chenze Qi<sup>a</sup> and Zhenlu Shen<sup>\*b</sup>

*<sup>a</sup>School of Chemistry and Chemical Engineering, Zhejiang Key Laboratory of Alternative Technologies for Fine Chemicals Process, Shaoxing University, Shaoxing, Zhejiang Province 312000, China.*

*<sup>b</sup>College of Chemical Engineering, Zhejiang University of Technology, Hangzhou Zhejiang Province 310032, China.*

*Fax: 86 (575) 88345682; Tel: 86 (575) 88345682; E-mail: [frzhang@usx.edu.cn](mailto:frzhang@usx.edu.cn) (F. R. Zhang); [zhenlushen@zjut.edu.cn](mailto:zhenlushen@zjut.edu.cn) (Z. L. Shen)*

## Electronic Supplementary Information (ESI)

**Supplementary Information Available:** complete product characterization data, analytical details.

### Table of Contents

|                                                             |            |
|-------------------------------------------------------------|------------|
| <b>1. General information.....</b>                          | <b>S3</b>  |
| <b>2. X-ray Crystallography.....</b>                        | <b>S3</b>  |
| <b>3. General procedure for the synthesis of 5.....</b>     | <b>S3</b>  |
| <b>4. General procedure for the synthesis of 7.....</b>     | <b>S4</b>  |
| <b>5. General procedure for the synthesis of 9.....</b>     | <b>S4</b>  |
| <b>6. Spectral data of the compounds.....</b>               | <b>S4</b>  |
| <b>7. <sup>1</sup>H and <sup>13</sup>C NMR spectra.....</b> | <b>S15</b> |

### General information

All reagents were purchased from commercial suppliers and were used without further purification. The reactions were monitored by thin-layer chromatography (TLC) analysis using silica gel (GF254) plates. <sup>1</sup>H NMR spectra were recorded on a 400 MHz instrument (Bruker Avance 400 Spectrometer). Chemical shifts ( $\delta$ ) are given in ppm relative to TMS as the internal reference, with coupling constants ( $J$ ) in Hz. <sup>13</sup>C NMR spectra were recorded at 100 MHz. Chemical shift were reported in ppm with the internal chloroform signal at 77.7 ppm and dimethyl sulphoxide signal at 39.9 ppm as a standard. HRMS (ESI) was measured with a Waters XEVO G2-XS QTOF/H-CLASS instrument. Single-crystal X-ray diffraction measurement was carried out on a Rigaku Saturn CCD diffractometer at 100(2) K using graphite monochromated Mo K $\alpha$  radiation ( $\lambda = 0.71073$  Å). The structure was solved by direct methods and refined by full-matrix least squares on  $F^2$  using the SHELXTL-97 program package.

### X-ray Crystallography

Single-crystal X-ray diffraction measurement was carried out on a Rigaku Saturn CCD diffractometer at 100.00(10) K using graphite monochromated CuK $\alpha$  radiation ( $\lambda = 1.54184$ ). An empirical absorption correction was applied using the SADABS program. The structure was solved by direct methods and refined by full-matrix least squares on  $F^2$  using the SHELXTL-97 program package.

### General procedure for the synthesis of products 5.

Typically, 6-methyl-1-aryl-4-(phenylamino)pyridin-2(1*H*)-one **1** (0.4 mmol), 2,2-dihydroxy-1-phenylethan-1-one **2** (0.4 mmol), and Meldrum acid **3** (0.4 mmol) were introduced in a 10-mL reaction vial with acetic acid (0.04 mmol) and water (3 mL). Subsequently, the reaction vial was stirred and heated at 80 °C. The reaction was monitored by TLC until conversion of the substrates was complete about 2 hours. The mixture was cooled to room temperature. The resulted precipitate was filtered and the crude products were further purified by recrystallization [from the mixture of hot 95% ethanol and \*N,N\*-dimethylformamide](#) to give the pure products **5**.

### General procedure for the synthesis of products 7.

Similarly, 6-methyl-1-aryl-4-(phenylamino)pyridin-2(1*H*)-one **1** (0.4 mmol), 2,2-dihydroxy-1-phenylethan-1-one **2** (0.4 mmol), and Meldrum acid **3** (0.4 mmol) were introduced in a 10-mL reaction vial with acetic acid (0.04 mmol) and water (3 mL). Subsequently, the reaction vial was stirred and heated 80 °C for about 2 hours. Then, alcohol **6** (0.8 mmol) was added the mixture and stirred for another 2 hours. The mixture was cooled and the precipitate was filtered. The crude products were further purified by recrystallization from hot 95% ethanol to give the pure products **7**.

### General procedure for the synthesis of products 9.

Similarly, 6-methyl-1-aryl-4-(phenylamino)pyridin-2(1*H*)-one **1** (0.4 mmol), 2,2-dihydroxy-1-phenylethan-1-one **2** (0.4 mmol), and Meldrum acid **3** (0.4 mmol) were introduced in a 10-mL reaction vial with acetic acid (0.04 mmol) and water (3 mL). Subsequently, the reaction vial was stirred and heated 80 °C for about 2 hours. Then, alcohol **6** (0.8 mmol) was added the mixture and stirred for another 2 hours. Lastly, amine **8** (0.4 mmol) was added above mixture for about 4 hours indicated by TLC. The crude products were further purified by recrystallization [from the mixture of hot 95% ethanol and \*N,N\*-dimethylformamide](#) to give the pure desired products **9**.

### Spectral data of the compounds

#### 2-(2-(4-bromophenyl)-6-methyl-4-oxo-1,5-diphenyl-4,5-dihydro-1*H*-pyrrolo[3,2-*c*]pyridin-3-yl)acetic acid (**5a**)

Pale yellow solid; Mp: >300 °C; <sup>1</sup>H NMR (400 MHz, CDCl<sub>3</sub>, TMS): δ 7.54-7.62 (m, 3H, ArH), 7.45 (t, *J* = 8.0 Hz, 5H, ArH), 7.29-7.30 (m, 2H, ArH), 7.17-7.22 (m, 4H, ArH), 6.39 (s, 1H, CH), 3.78 (s, 2H, CH<sub>2</sub>), 2.05 (s, 3H, CH<sub>3</sub>); <sup>13</sup>C NMR (100 MHz, CDCl<sub>3</sub>, TMS): δ 172.3, 162.8, 141.0, 140.5, 138.2, 136.5, 136.1, 132.3, 131.6, 129.9, 129.8, 129.2, 128.6, 128.2, 128.0, 127.6, 122.6, 112.5, 112.0, 96.6, 33.9, 22.1; HRMS (ESI) *m/z* calcd for C<sub>28</sub>H<sub>22</sub>BrN<sub>2</sub>O<sub>3</sub> [M + H]<sup>+</sup>: 513.0808, found: 513.0811.

#### 2-(2-(4-bromophenyl)-6-methyl-4-oxo-1,5-di-*p*-tolyl-4,5-dihydro-1*H*-pyrrolo[3,2-*c*]pyridin-3-yl)acetic acid (**5b**)

White powder; Mp: >300 °C; <sup>1</sup>H NMR (400 MHz, CDCl<sub>3</sub>, TMS): δ 13.90 (s, 1H, OH),

7.34-7.41 (m, 4H, ArH), 7.13-7.19 (m, 6H, ArH), 7.01 (s, 2H, ArH), 6.31 (s, 1H, CH), 3.72 (s, 2H, CH<sub>2</sub>), 2.43 (s, 3H, CH<sub>3</sub>), 2.39 (s, 3H, CH<sub>3</sub>), 2.01 (s, 3H, CH<sub>3</sub>); <sup>13</sup>C NMR (100 MHz, CDCl<sub>3</sub>, TMS): δ 172.2, 162.5, 141.2, 141.3, 140.5, 140.4, 140.3, 138.2, 136.5, 136.1, 132.3, 131.6, 129.2, 128.6, 128.1, 128.0, 127.6, 96.6, 33.9, 22.6, 22.1; HRMS (ESI) m/z calcd for C<sub>30</sub>H<sub>26</sub>BrN<sub>2</sub>O<sub>3</sub> [M + H]<sup>+</sup>: 541.1121, found: 541.1116.

**2-(1,5-bis(4-fluorophenyl)-6-methyl-4-oxo-2-phenyl-4,5-dihydro-1H-pyrrolo[3,2-c]pyridin-3-yl)acetic acid (5c)**

Pale yellow solid; Mp: >300 °C; <sup>1</sup>H NMR (400 MHz, CDCl<sub>3</sub>, TMS): δ 7.28-7.39 (m, 8H, ArH), 7.11-7.18 (m, 8H, ArH), 6.35 (s, 1H, CH), 3.79 (s, 2H, CH), 2.07 (s, 3H, CH<sub>3</sub>); <sup>13</sup>C NMR (100 MHz, CDCl<sub>3</sub>, TMS): δ 172.2, 162.9, 162.6 (<sup>1</sup>J<sub>CF</sub> = 247.8 Hz), 162.0 (<sup>1</sup>J<sub>CF</sub> = 248.0 Hz), 140.8, 140.2, 137.6, 134.1 (<sup>4</sup>J<sub>CF</sub> = 2.8 Hz), 132.7 (<sup>4</sup>J<sub>CF</sub> = 2.8 Hz), 130.9, 130.1 (<sup>3</sup>J<sub>CF</sub> = 8.6 Hz), 129.3 (<sup>3</sup>J<sub>CF</sub> = 8.7 Hz), 128.8, 128.5, 128.3, 127.9, 116.9 (<sup>2</sup>J<sub>CF</sub> = 22.9 Hz), 116.6 (<sup>2</sup>J<sub>CF</sub> = 22.9 Hz), 112.4, 111.7, 96.5, 33.8, 22.1; HRMS (ESI) m/z calcd for C<sub>28</sub>H<sub>21</sub>F<sub>2</sub>N<sub>2</sub>O<sub>3</sub> [M + H]<sup>+</sup>: 471.1515, found: 471.1511.

**2-(1,5-dibenzyl-2-(4-bromophenyl)-6-methyl-4-oxo-4,5-dihydro-1H-pyrrolo[3,2-c]pyridin-3-yl)acetic acid (5d)**

Pale yellow solid; Mp: 230-232 °C; <sup>1</sup>H NMR (400 MHz, CDCl<sub>3</sub>, TMS): δ 7.59 (d, *J* = 8.4 Hz, 2H, ArH), 7.28-7.37 (m, 8H, ArH), 7.17 (d, *J* = 6.8 Hz, 2H, ArH), 6.93 (d, *J* = 7.6 Hz, 2H, ArH), 5.51 (s, 2H, CH<sub>2</sub>), 5.18 (s, 2H, CH<sub>2</sub>), 3.74 (s, 2H, CH<sub>2</sub>), 2.37 (s, 3H, CH<sub>3</sub>); <sup>13</sup>C NMR (100 MHz, CDCl<sub>3</sub>, TMS): δ 172.4, 168.4, 140.2, 140.1, 136.6, 136.5, 136.4, 132.5, 132.0, 129.1, 128.9, 127.9, 127.5, 126.3, 125.7, 123.5, 112.2, 111.3, 97.0, 48.0, 47.2, 34.0, 21.3; HRMS (ESI) m/z calcd for C<sub>30</sub>H<sub>26</sub>BrN<sub>2</sub>O<sub>3</sub> [M + H]<sup>+</sup>: 541.1121, found: 541.1129.

**2-(2-(4-bromophenyl)-1,5-dibutyl-6-methyl-4-oxo-4,5-dihydro-1H-pyrrolo[3,2-c]pyridin-3-yl)acetic acid (5e)**

Gray powder; Mp: >300 °C; <sup>1</sup>H NMR (400 MHz, CDCl<sub>3</sub>, TMS): δ 7.62 (d, *J* = 8.4 Hz, 2H, ArH), 7.28 (d, *J* = 8.4 Hz, 2H, ArH), 6.37 (s, CH, ArH), 4.12 (t, *J* = 7.6 Hz, 2H, CH<sub>2</sub>), 3.88 (d, *J* = 7.2 Hz, 2H, CH<sub>2</sub>), 3.58 (s, 2H, CH<sub>2</sub>), 2.51 (s, 3H, CH<sub>3</sub>), 1.66-1.70 (m, 2H, CH<sub>2</sub>), 1.40-1.47 (m, 4H, CH<sub>2</sub>), 1.04-1.10 (m, 2H, CH<sub>2</sub>), 0.96 (t, *J* = 7.2 Hz, 3H, CH<sub>3</sub>), 0.75 (t, *J* = 7.2 Hz, 2H, CH<sub>3</sub>); <sup>13</sup>C NMR (100 MHz, CDCl<sub>3</sub>, TMS): δ 172.6, 162.0, 139.3, 138.8, 135.8, 132.5, 132.0, 128.5, 123.2, 112.2, 110.8, 96.6, 44.4, 44.1, 32.8, 32.3, 31.2, 21.1, 20.3, 19.8, 13.8, 13.5; HRMS (ESI) m/z calcd for C<sub>24</sub>H<sub>30</sub>BrN<sub>2</sub>O<sub>3</sub> [M + H]<sup>+</sup>:

473.1434, found: 473.1433.

**2-(6-methyl-4-oxo-1,2,5-triphenyl-4,5-dihydro-1H-pyrrolo[3,2-c]pyridin-3-yl)acetic acid (5f)**

White solid; Mp: 285-286 °C; <sup>1</sup>H NMR (400 MHz, CDCl<sub>3</sub>, TMS): δ 7.49-7.61 (m, 5H, ArH), 7.40-7.46 (m, 4H, ArH), 7.31-7.34 (m, 9H, ArH), 7.24-7.28 (m, 2H, ArH), 7.19 (d, *J* = 7.6 Hz, 2H, ArH), 6.40 (s, 1H, CH), 3.81 (s, 2H, CH), 2.06 (s, 3H, CH<sub>3</sub>); <sup>13</sup>C NMR (100 MHz, CDCl<sub>3</sub>, TMS): δ 172.5, 162.9, 140.9, 140.1, 138.4, 137.5, 136.9, 131.0, 129.9, 129.6, 129.5, 129.4, 129.1, 129.0, 128.8, 128.4, 128.1, 127.8, 127.6, 127.5, 112.6, 111.7, 96.7, 33.9, 22.2; HRMS (ESI) *m/z* calcd for C<sub>28</sub>H<sub>23</sub>N<sub>2</sub>O<sub>3</sub> [M + H]<sup>+</sup>: 435.1703, found: 435.1698.

**2-(2-(4-fluorophenyl)-6-methyl-4-oxo-1,5-diphenyl-4,5-dihydro-1H-pyrrolo[3,2-c]pyridin-3-yl)acetic acid (5g)**

Pale yellow solid; Mp: >300 °C; <sup>1</sup>H NMR (400 MHz, CDCl<sub>3</sub>, TMS): δ 7.54-7.62 (m, 3H, ArH), 7.42-7.46 (m, 3H, ArH), 7.29-7.33 (m, 5H, ArH), 7.18 (d, *J* = 6.8 Hz, 2H, ArH), 7.03 (t, *J* = 8.8 Hz, 2H, ArH), 6.39 (s, 1H, CH), 3.78 (s, 2H, CH), 2.05 (s, 3H, CH<sub>3</sub>); <sup>13</sup>C NMR (100 MHz, CDCl<sub>3</sub>, TMS): δ 172.4, 162.8 (<sup>1</sup>*J*<sub>CF</sub> = 247.4 Hz), 140.8, 140.3, 138.3, 136.6, 136.3, 132.7 (<sup>3</sup>*J*<sub>CF</sub> = 8.2 Hz), 129.9, 129.6, 129.2, 128.5, 128.3, 127.6, 125.2, 125.1, 115.5 (<sup>2</sup>*J*<sub>CF</sub> = 22.0 Hz), 115.4, 112.4, 111.7, 96.6, 33.9, 22.1; HRMS (ESI) *m/z* calcd for C<sub>28</sub>H<sub>22</sub>FN<sub>2</sub>O<sub>3</sub> [M + H]<sup>+</sup>: 453.1609, found: 453.1605.

**ethyl 2-(2-(4-bromophenyl)-6-methyl-4-oxo-1,5-diphenyl-4,5-dihydro-1H-pyrrolo[3,2-c]pyridin-3-yl)acetate (7a)**

Brown powder; Mp: 246-248 °C; <sup>1</sup>H NMR (400 MHz, CDCl<sub>3</sub>, TMS): δ 7.52 (t, *J* = 7.2 Hz, 2H, ArH), 7.38-7.46 (m, 7H, ArH), 7.28 (t, *J* = 5.6 Hz, 2H, ArH), 7.19 (d, *J* = 7.2 Hz, 2H, ArH), 7.05 (d, *J* = 8.0 Hz, 2H, ArH), 6.16 (s, 1H, CH), 4.12-4.18 (m, 2H, CH<sub>2</sub>), 3.98 (s, 2H, CH<sub>2</sub>), 1.95 (s, 3H, CH<sub>3</sub>), 1.22 (m, *J* = 6.8 Hz, 3H, CH<sub>3</sub>); <sup>13</sup>C NMR (100 MHz, CDCl<sub>3</sub>, TMS): δ 172.5, 161.1, 140.0, 139.3, 137.0, 134.4, 131.8, 131.5, 129.7, 129.5, 129.4, 128.8, 128.3, 127.9, 127.7, 122.0, 113.6, 112.8, 94.5, 60.7, 30.8, 22.3, 14.2; HRMS (ESI) *m/z* calcd for C<sub>30</sub>H<sub>26</sub>BrN<sub>2</sub>O<sub>3</sub> [M + H]<sup>+</sup>: 541.1121, found: 541.1123.

**methyl 2-(2-(4-bromophenyl)-6-methyl-4-oxo-1,5-diphenyl-4,5-dihydro-1H-pyrrolo[3,2-c]pyridin-3-yl)acetate (7b)**

Yellow powder; Mp: 238-240 °C; <sup>1</sup>H NMR (400 MHz, CDCl<sub>3</sub>, TMS): δ 7.53 (t, *J* = 8.0

Hz, 2H, ArH), 7.45 (t,  $J = 7.2$  Hz, 1H, ArH), 7.35-7.42 (m, 3H, ArH), 7.26-7.29 (m, 5H, ArH), 7.17-7.22 (m, 4H, ArH), 6.19 (s, 1H, CH), 4.01 (s, 2H, CH<sub>2</sub>), 3.69 (s, 3H, OCH<sub>3</sub>), 1.96 (s, 3H, CH<sub>3</sub>); <sup>13</sup>C NMR (100 MHz, CDCl<sub>3</sub>, TMS):  $\delta$  173.1, 161.2, 139.8, 139.7, 139.4, 137.2, 135.8, 130.6, 130.4, 129.5, 129.2, 128.9, 128.3, 128.2, 127.7, 113.0, 112.7, 94.6, 52.0, 30.8, 22.2; HRMS (ESI)  $m/z$  calcd for C<sub>29</sub>H<sub>24</sub>BrN<sub>2</sub>O<sub>3</sub> [M + H]<sup>+</sup>: 527.0965, found: 527.0966.

**isopropyl 2-(2-(4-bromophenyl)-6-methyl-4-oxo-1,5-diphenyl-4,5-dihydro-1H-pyrrolo[3,2-c]pyridin-3-yl)acetate (7c)**

Yellow powder; Mp: 228-230 °C; <sup>1</sup>H NMR (400 MHz, CDCl<sub>3</sub>, TMS):  $\delta$  7.52 (t,  $J = 7.6$  Hz, 2H, ArH), 7.33-7.46 (m, 4H, ArH), 7.25-7.29 (m, 5H, ArH), 7.16-7.21 (m, 4H, ArH), 6.19 (s, 1H, CH), 5.00-5.03 (m, 1H, CH), 4.00 (s, 2H, CH<sub>2</sub>), 1.96 (s, 3H, CH<sub>3</sub>), 1.21 (t,  $J = 6.0$  Hz, 6H, CH<sub>3</sub>); <sup>13</sup>C NMR (100 MHz, CDCl<sub>3</sub>, TMS):  $\delta$  172.1, 161.2, 139.7, 139.5, 139.4, 137.3, 135.7, 130.8, 130.4, 129.5, 129.2, 128.9, 128.3, 128.1, 127.7, 127.6, 113.3, 112.8, 94.6, 67.8, 31.1, 25.3, 22.2, 21.8; HRMS (ESI)  $m/z$  calcd for C<sub>31</sub>H<sub>28</sub>BrN<sub>2</sub>O<sub>3</sub> [M + H]<sup>+</sup>: 555.1278, found: 555.1283.

**tert-butyl 2-(2-(4-bromophenyl)-6-methyl-4-oxo-1,5-diphenyl-4,5-dihydro-1H-pyrrolo[3,2-c]pyridin-3-yl)acetate (7d)**

Pale yellow solid; Mp: 289-290 °C; <sup>1</sup>H NMR (400 MHz, CDCl<sub>3</sub>, TMS):  $\delta$  7.51 (t,  $J = 7.6$  Hz, 2H, ArH), 7.37-7.46 (m, 6H, ArH), 7.25-7.29 (m, 2H, ArH), 7.19 (d,  $J = 6.8$  Hz, 2H, ArH), 7.06 (d,  $J = 6.8$  Hz, 2H, ArH), 6.15 (s, 1H, CH), 3.95 (s, 2H, CH<sub>2</sub>), 1.95 (s, 3H, CH<sub>3</sub>), 1.42 (s, 9H, CH<sub>3</sub>); <sup>13</sup>C NMR (100 MHz, CDCl<sub>3</sub>, TMS):  $\delta$  171.8, 139.9, 139.8, 139.4, 137.1, 131.8, 131.3, 130.0, 129.4, 128.9, 128.2, 127.8, 127.7, 121.8, 114.3, 112.7, 94.4, 80.4, 31.7, 28.0, 22.2; HRMS (ESI)  $m/z$  calcd for C<sub>32</sub>H<sub>30</sub>BrN<sub>2</sub>O<sub>3</sub> [M + H]<sup>+</sup>: 569.1434, found: 569.1434.

**ethyl 2-(2-(4-bromophenyl)-6-methyl-4-oxo-1,5-di-p-tolyl-4,5-dihydro-1H-pyrrolo[3,2-c]pyridin-3-yl)acetate (7e)**

Pale yellow crystal; Mp: 258-260 °C; <sup>1</sup>H NMR (400 MHz, CDCl<sub>3</sub>, TMS):  $\delta$  7.39 (d,  $J = 8.0$  Hz, 2H, ArH), 7.30 (t,  $J = 8.0$  Hz, 3H, ArH), 7.20 (d,  $J = 8.0$  Hz, 2H, ArH), 7.13 (d,  $J = 8.0$  Hz, 2H, ArH), 7.06 (t,  $J = 4.4$  Hz, 2H, ArH), 6.13 (s, 1H, CH), 4.12-4.16 (m, 2H, CH<sub>2</sub>), 3.97 (s, 1H, CH), 2.41 (d,  $J = 10.0$  Hz, 6H, CH<sub>3</sub>), 1.95 (s, 3H, CH<sub>3</sub>), 1.22 (t,  $J = 7.2$  Hz, 3H, CH<sub>3</sub>); <sup>13</sup>C NMR (100 MHz, CDCl<sub>3</sub>, TMS):  $\delta$  172.5, 161.2, 140.0, 138.1, 137.8,

136.7,134.4, 131.9, 131.4, 130.2, 130.0, 129.8, 128.5, 127.9, 127.4, 121.8, 113.3, 112.6, 94.4, 60.7, 30.8, 22.2, 21.2, 14.2; HRMS (ESI)  $m/z$  calcd for  $C_{32}H_{30}BrN_2O_3$   $[M + H]^+$ : 569.1434, found: 569.1429.

**ethyl 2-(2-(4-bromophenyl)-6-methyl-4-oxo-1,5-di-o-tolyl-4,5-dihydro-1H-pyrrolo[3,2-c]pyridin-3-yl)acetate (7f)**

Brown solid; Mp: 170-172 °C;  $^1H$  NMR (400 MHz,  $CDCl_3$ , TMS):  $\delta$  7.26-7.38 (m, 7H, ArH), 7.18-7.23 (m, 3H, ArH), 7.05-7.08 (m, 2H, ArH), 5.87 (s, 1H, CH), 4.12-4.18 (m, 2H,  $CH_2$ ), 3.94-4.06 (m, 2H,  $CH_2$ ), 2.13 (d,  $J = 4.4$  Hz, 3H,  $CH_3$ ), 1.96 (d,  $J = 4.0$  Hz, 3H,  $CH_3$ ), 1.86 (s, 3H,  $CH_3$ ), 1.20-1.25 (m, 3H,  $CH_3$ );  $^{13}C$  NMR (100 MHz,  $CDCl_3$ , TMS):  $\delta$  172.4, 160.4, 140.1, 139.6, 138.5, 136.6, 136.5, 136.1, 136.0, 134.7, 131.4, 131.2, 131.0, 129.8, 129.7, 129.2, 129.0, 128.7, 128.6, 127.1, 126.8, 121.9, 115.3, 113.2, 112.7, 94.4, 60.7, 30.9, 21.7, 17.7, 17.6, 14.2; HRMS (ESI)  $m/z$  calcd for  $C_{32}H_{30}BrN_2O_3$   $[M + H]^+$ : 569.1434, found: 569.1432.

**ethyl 2-(2-(4-bromophenyl)-1,5-bis(2,4-dimethylphenyl)-6-methyl-4-oxo-4,5-dihydro-1H-pyrrolo[3,2-c]pyridin-3-yl)acetate (7g)**

Yellow solid; Mp: 222-224 °C;  $^1H$  NMR (400 MHz,  $CDCl_3$ , TMS):  $\delta$  7.37 (d,  $J = 8.4$  Hz, 2H, ArH), 7.03-7.18 (m, 8H, ArH), 5.86 (s, 1H, CH), 4.12-4.15 (m, 2H,  $CH_2$ ), 3.99 (s, 2H,  $CH_2$ ), 2.38 (d,  $J = 2.4$  Hz, 6H,  $CH_3$ ), 2.08 (d,  $J = 4.0$  Hz, 3H,  $CH_3$ ), 1.87-1.92 (s, 6H,  $CH_3$ ), 1.19-1.24 (m, 3H,  $CH_3$ );  $^{13}C$  NMR (100 MHz,  $CDCl_3$ , TMS):  $\delta$  172.5, 172.4, 160.6, 140.2, 139.7, 138.8, 138.3, 136.0, 135.8, 135.6, 134.7, 133.4, 132.0, 131.8, 131.5, 131.3, 129.9, 128.9, 128.4, 127.8, 127.5, 121.8, 113.0, 112.6, 94.4, 60.6, 30.9, 21.7, 21.2, 17.6, 17.5, 14.2; HRMS (ESI)  $m/z$  calcd for  $C_{34}H_{34}BrN_2O_3$   $[M + H]^+$ : 597.1747, found: 597.1754.

**ethyl 2-(2-(4-bromophenyl)-1,5-bis(4-fluorophenyl)-6-methyl-4-oxo-4,5-dihydro-1H-pyrrolo[3,2-c]pyridin-3-yl)acetate (7h)**

Yellow powder; Mp: >300 °C;  $^1H$  NMR (400 MHz,  $CDCl_3$ , TMS):  $\delta$  7.41 (d,  $J = 8.4$  Hz, 2H, ArH), 7.11-7.23 (m, 8H, ArH), 7.04 (d,  $J = 8.4$  Hz, 2H, ArH), 6.11 (s, 1H, CH), 4.12-4.18 (m, 2H,  $CH_2$ ), 3.94 (s, 2H,  $CH_2$ ), 1.96 (s, 3H,  $CH_3$ ), 1.23 (t,  $J = 8.0$  Hz, 3H,  $CH_3$ );  $^{13}C$  NMR (100 MHz,  $CDCl_3$ , TMS):  $\delta$  172.4, 162.3 ( $^1J_{CF} = 242.3$  Hz), 162.2 ( $^1J_{CF} = 242.5$  Hz), 140.0, 135.1 ( $^4J_{CF} = 3.0$  Hz), 134.6 ( $^4J_{CF} = 3.0$  Hz), 132.9, 131.9, 131.6, 130.6, 130.5 ( $^3J_{CF} = 9.0$  Hz), 129.4 ( $^3J_{CF} = 8.9$  Hz), 122.2, 116.5 ( $^2J_{CF} = 22.8$  Hz), 116.4 ( $^2J_{CF} =$



22.7 Hz), 113.6, 112.7, 94.5, 60.8, 30.8, 22.3, 14.2; HRMS (ESI)  $m/z$  calcd for  $C_{30}H_{24}BrF_2N_2O_3$   $[M + H]^+$ : 577.0933, found: 577.0929.

**ethyl 2-(2-(4-bromophenyl)-1,5-bis(2-fluorophenyl)-6-methyl-4-oxo-4,5-dihydro-1H-pyrrolo[3,2-c]pyridin-3-yl)acetate (7i)**

Yellow solid; Mp: 245-246 °C;  $^1H$  NMR (400 MHz,  $CDCl_3$ , TMS):  $\delta$  7.39-7.48 (m, 5H, ArH), 7.19-7.36 (m, 7H, ArH), 7.08 (d,  $J = 8.4$  Hz, 2H, ArH), 6.03 (s, 1H, CH), 4.12-4.17 (m, 2H,  $CH_2$ ), 3.80-4.02 (m, 1H,  $CH_2$ ), 7.75-3.80 (m, 1H,  $CH_2$ ), 1.99 (s, 3H,  $CH_3$ ), 1.22 (t,  $J = 4.0$  Hz, 3H,  $CH_3$ );  $^{13}C$  NMR (100 MHz,  $CDCl_3$ , TMS):  $\delta$  172.2, 172.1, 160.4 ( $^1J_{CF} = 242.5$  Hz), 160.2 ( $^1J_{CF} = 242.4$  Hz), 140.6, 140.5 ( $^4J_{CF} = 2.1$  Hz), 140.1 ( $^4J_{CF} = 2.7$  Hz), 134.9, 131.5, 130.9 ( $^3J_{CF} = 7.5$  Hz), 130.5, 130.4, 130.3, 130.2 ( $^3J_{CF} = 6.6$  Hz), 129.3, 124.9, 122.3, 117.0 ( $^2J_{CF} = 22.5$  Hz), 116.8 ( $^2J_{CF} = 22.4$  Hz), 113.8, 112.8, 94.7, 94.6, 60.7, 30.8, 21.5, 14.1; HRMS (ESI)  $m/z$  calcd for  $C_{30}H_{24}BrF_2N_2O_3$   $[M + H]^+$ : 577.0933, found: 577.0932.

**ethyl 2-(2-(4-bromophenyl)-1,5-bis(3-chlorophenyl)-6-methyl-4-oxo-4,5-dihydro-1H-pyrrolo[3,2-c]pyridin-3-yl)acetate (7j)**

Yellow crystal; Mp: 275-276 °C;  $^1H$  NMR (400 MHz,  $CDCl_3$ , TMS):  $\delta$  7.42-7.49 (m, 4H, ArH), 7.27-7.38 (m, 2H, ArH), 7.28 (d,  $J = 6.8$  Hz, 3H, ArH), 7.17 (d,  $J = 6.8$  Hz, 1H, ArH), 7.01-7.06 (m, 3H, ArH), 6.15 (s, 1H, CH), 4.13-4.19 (m, 2H,  $CH_2$ ), 3.93 (s, 2H,  $CH_2$ ), 1.99 (s, 3H,  $CH_3$ ), 1.23 (m,  $J = 6.8$  Hz, 3H,  $CH_3$ );  $^{13}C$  NMR (100 MHz,  $CDCl_3$ , TMS):  $\delta$  172.3, 160.8, 140.3, 139.9, 138.0, 135.1, 135.0, 134.5, 131.8, 131.7, 130.5, 129.3, 129.1, 128.8, 128.3, 127.7, 127.3, 126.1, 122.3, 114.1, 112.8, 94.5, 60.8, 30.8, 22.2, 14.2; HRMS (ESI)  $m/z$  calcd for  $C_{30}H_{24}BrCl_2N_2O_3$   $[M + H]^+$ : 609.0342, found: 609.0344.

**ethyl 2-(6-methyl-4-oxo-1,2,5-triphenyl-4,5-dihydro-1H-pyrrolo[3,2-c]pyridin-3-yl)acetate (7k).**

Brown solid; Mp: 261-262 °C;  $^1H$  NMR (400 MHz,  $CDCl_3$ , TMS):  $\delta$  7.49-7.53 (m, 2H, ArH), 7.31-7.44 (m, 6H, ArH), 7.23-7.25 (m, 5H, ArH), 7.15-7.20 (m, 4H, ArH), 6.16 (s, 1H, CH), 4.10-4.15 (m, 2H,  $CH_2$ ), 3.98 (s, 2H,  $CH_2$ ), 1.94 (m, 3H,  $CH_3$ ), 1.20 (t,  $J = 3.2$  Hz, 3H,  $CH_3$ );  $^{13}C$  NMR (100 MHz,  $CDCl_3$ , TMS):  $\delta$  172.6, 139.6, 139.4, 137.3, 130.7, 130.4, 129.5, 129.2, 128.9, 128.3, 128.1, 127.7, 127.6, 113.1, 94.6, 60.6, 30.9, 22.2, 14.1; HRMS (ESI)  $m/z$  calcd for  $C_{30}H_{27}N_2O_3$   $[M + H]^+$ : 463.2016, found: 463.2011.

**ethyl 2-(2-(4-fluorophenyl)-6-methyl-4-oxo-1,5-diphenyl-4,5-dihydro-1H-**

**pyrrolo[3,2-c]pyridin-3-yl)acetate (7l).**

Pale yellow crystal; Mp: 256-258 °C; <sup>1</sup>H NMR (400 MHz, CDCl<sub>3</sub>, TMS): δ 7.46-7.51 (m, 2H, ArH), 7.36-7.44 (m, 4H, ArH), 7.26-7.29 (m, 3H, ArH), 7.14-7.20 (m, 4H, ArH), 6.96 (d, *J* = 8.4 Hz, 2H, ArH), 6.17 (s, 1H, CH), 4.12-4.17 (m, 2H, CH<sub>2</sub>), 3.97 (s, 2H, CH<sub>2</sub>), 1.95 (s, 3H, CH<sub>3</sub>), 1.22 (m, *J* = 6.8 Hz, 3H, CH<sub>3</sub>); <sup>13</sup>C NMR (100 MHz, CDCl<sub>3</sub>, TMS): δ 172.5, 161.1 (<sup>1</sup>*J*<sub>CF</sub> = 247.2 Hz), 139.7 (<sup>4</sup>*J*<sub>CF</sub> = 2.0 Hz), 139.4, 137.1, 134.7, 132.1 (<sup>3</sup>*J*<sub>CF</sub> = 8.0 Hz), 129.9, 129.6, 129.5, 129.3, 128.9, 128.3, 127.8, 127.7, 126.8, 115.3 (<sup>2</sup>*J*<sub>CF</sub> = 22.0 Hz), 113.2, 112.6, 94.6, 60.7, 30.8, 22.2, 14.2; HRMS (ESI) *m/z* calcd for C<sub>30</sub>H<sub>26</sub>FN<sub>2</sub>O<sub>3</sub> [M + H]<sup>+</sup>: 481.1922, found: 481.1933.

**2-(2-(4-bromophenyl)-6-methyl-4-oxo-1,5-diphenyl-4,5-dihydro-1H-pyrrolo[3,2-c]pyridin-3-yl)-N-phenylacetamide (9a).**

White powder; Mp: >300 °C; <sup>1</sup>H NMR (400 MHz, CDCl<sub>3</sub>, TMS): δ 11.23 (s, 1H, NH), 7.58-7.67 (m, 5H, ArH), 7.44-7.48 (m, 7H, ArH), 7.28-7.34 (m, 4H, ArH), 7.18-7.19 (m, 2H, ArH), 7.04-7.06 (m, 1H, ArH), 6.29 (s, 1H, CH), 3.81 (s, 2H, CH<sub>2</sub>), 2.02 (s, 3H, CH<sub>3</sub>); <sup>13</sup>C NMR (100 MHz, CDCl<sub>3</sub>, TMS): δ 170.2, 162.2, 140.8, 140.1, 139.6, 139.2, 136.9, 135.4, 132.7, 131.3, 129.9, 129.6, 128.9, 128.7, 128.5, 128.4, 128.2, 127.7, 123.1, 122.3, 119.4, 114.4, 112.2, 95.6, 34.9, 22.1; HRMS (ESI) *m/z* calcd for C<sub>34</sub>H<sub>27</sub>BrN<sub>3</sub>O<sub>2</sub> [M + H]<sup>+</sup>: 588.1281, found: 588.1277.

**2-(2-(4-bromophenyl)-6-methyl-4-oxo-1,5-diphenyl-4,5-dihydro-1H-pyrrolo[3,2-c]pyridin-3-yl)-N-(p-tolyl)acetamide (9b).**

White powder; Mp: >300 °C; <sup>1</sup>H NMR (400 MHz, CDCl<sub>3</sub>, TMS): δ 11.10 (s, 1H, NH), 7.55-7.63 (m, 3H, ArH), 7.42-7.48 (m, 9H, ArH), 7.27-7.31 (m, 3H, ArH), 7.07-7.17 (m, 4H, ArH), 6.26 (s, 1H, CH), 3.78 (s, 2H, CH<sub>2</sub>), 2.29 (s, 3H, CH<sub>3</sub>), 2.00 (s, 3H, CH<sub>3</sub>); <sup>13</sup>C NMR (100 MHz, CDCl<sub>3</sub>, TMS): δ 170.0, 162.2, 140.8, 140.1, 139.2, 137.0, 136.9, 135.4, 132.7, 132.5, 131.3, 129.8, 129.6, 129.2, 128.9, 128.5, 128.4, 128.2, 127.7, 122.2, 119.3, 114.6, 112.2, 95.6, 34.8, 22.1, 20.9; HRMS (ESI) *m/z* calcd for C<sub>35</sub>H<sub>29</sub>BrN<sub>3</sub>O<sub>2</sub> [M + H]<sup>+</sup>: 602.1438, found: 602.1447.

**2-(2-(4-bromophenyl)-6-methyl-4-oxo-1,5-diphenyl-4,5-dihydro-1H-pyrrolo[3,2-c]pyridin-3-yl)-N-(4-methoxyphenyl)acetamide (9c).**

White solid; Mp: 286-288 °C; <sup>1</sup>H NMR (400 MHz, CDCl<sub>3</sub>, TMS): δ 11.9 (s, 1H, NH), 7.65 (t, *J* = 7.6 Hz, 2H, ArH), 7.18 (d, *J* = 7.2 Hz, 1H, ArH), 7.53 (d, *J* = 8.4 Hz, 2H,

ArH), 7.31 (d,  $J = 7.6$  Hz, 2H, ArH), 7.18 (d,  $J = 6.8$  Hz, 2H, ArH), 6.29 (s, 1H, CH), 3.80 (s, 5H, OMe + CH<sub>2</sub>), 2.02 (s, 3H, CH<sub>3</sub>); <sup>13</sup>C NMR (100 MHz, CDCl<sub>3</sub>, TMS):  $\delta$  169.8, 162.2, 155.5, 140.8, 140.1, 139.2, 136.9, 135.4, 133.0, 132.7, 131.3, 129.9, 129.6, 128.9, 128.5, 128.4, 128.2, 127.7, 122.2, 120.8, 114.6, 113.9, 112.3, 95.6, 55.5, 34.8, 22.2; HRMS (ESI)  $m/z$  calcd for C<sub>35</sub>H<sub>29</sub>BrN<sub>3</sub>O<sub>3</sub> [M + H]<sup>+</sup>: 618.1387, found: 618.1391.

**2-(2-(4-bromophenyl)-6-methyl-4-oxo-1,5-diphenyl-4,5-dihydro-1H-pyrrolo[3,2-c]pyridin-3-yl)-N-(4-fluorophenyl)acetamide (9d).**

White powder; Mp: 293-294 °C; <sup>1</sup>H NMR (400 MHz, CDCl<sub>3</sub>, TMS):  $\delta$  11.28 (s, 1H, NH), 7.63-7.67 (m, 2H, ArH), 7.54-7.60 (m, 3H, ArH), 7.39-7.48 (m, 7H, ArH), 7.29-7.32 (m, 3H, ArH), 7.18 (d,  $J = 6.8$  Hz, 2H, ArH), 6.97 (t,  $J = 8.8$  Hz, 2H, ArH), 6.30 (s, 1H, CH), 3.79 (s, 2H, CH<sub>2</sub>), 2.02 (s, 3H, CH<sub>3</sub>); <sup>13</sup>C NMR (100 MHz, CDCl<sub>3</sub>, TMS):  $\delta$  170.1, 161.2 (<sup>1</sup> $J_{CF} = 245.2$  Hz), 157.4, 140.8, 140.2, 139.2, 136.8, 135.7, 135.5 (<sup>4</sup> $J_{CF} = 2.0$  Hz), 132.6, 131.3, 129.9, 129.6, 129.0, 128.4 (<sup>3</sup> $J_{CF} = 8.2$  Hz), 127.7, 122.3, 120.9, 120.8, 161.1 (<sup>2</sup> $J_{CF} = 22.2$  Hz), 114.3, 112.2, 95.7, 34.8, 22.1; HRMS (ESI)  $m/z$  calcd for C<sub>34</sub>H<sub>26</sub>BrFN<sub>3</sub>O<sub>2</sub> [M + H]<sup>+</sup>: 606.1187, found: 606.1196.

**2-(2-(4-bromophenyl)-6-methyl-4-oxo-1,5-diphenyl-4,5-dihydro-1H-pyrrolo[3,2-c]pyridin-3-yl)-N-(4-chlorophenyl)acetamide (9e).**

Pale yellow powder; Mp: 261-262 °C; <sup>1</sup>H NMR (400 MHz, CDCl<sub>3</sub>, TMS):  $\delta$  11.36 (s, 1H, NH), 7.63-7.67 (m, 2H, ArH), 7.59 (d,  $J = 7.6$  Hz, 1H, ArH), 7.54 (d,  $J = 8.8$  Hz, 2H, ArH), 7.38-7.48 (m, 7H, ArH), 7.38-7.48 (m, 4H, ArH), 7.29-7.31 (m, 4H, ArH), 7.24 (d,  $J = 8.4$  Hz, 2H, ArH), 7.18 (d,  $J = 6.8$  Hz, 2H, ArH), 6.30 (s, 1H, CH), 3.78 (s, 2H, CH<sub>2</sub>), 2.02 (s, 3H, CH<sub>3</sub>); <sup>13</sup>C NMR (100 MHz, CDCl<sub>3</sub>, TMS):  $\delta$  170.2, 162.2, 140.9, 140.2, 139.1, 138.2, 136.8, 135.6, 132.6, 131.4, 129.9, 129.6, 129.0, 128.6, 128.3, 127.8, 127.7, 122.4, 120.6, 114.1, 112.2, 95.7, 34.9, 22.1; HRMS (ESI)  $m/z$  calcd for C<sub>34</sub>H<sub>26</sub>BrClN<sub>3</sub>O<sub>2</sub> [M + H]<sup>+</sup>: 622.0891, found: 622.0898.

**N-(4-bromophenyl)-2-(2-(4-bromophenyl)-6-methyl-4-oxo-1,5-diphenyl-4,5-dihydro-1H-pyrrolo[3,2-c]pyridin-3-yl)acetamide (9f).**

White powder; Mp: >300 °C; <sup>1</sup>H NMR (400 MHz, CDCl<sub>3</sub>, TMS):  $\delta$  11.40 (s, 1H, NH), 7.64 (d,  $J = 6.8$  Hz, 2H, ArH), 7.59 (d,  $J = 6.0$  Hz, 1H, ArH), 7.19-7.51 (m, 11H, ArH), 7.30 (d,  $J = 7.2$  Hz, 2H, ArH), 7.19 (s, 2H, ArH), 6.30 (s, 1H, CH), 3.78 (s, 1H, CH<sub>2</sub>), 2.02 (s, 3H, CH<sub>3</sub>); <sup>13</sup>C NMR (100 MHz, CDCl<sub>3</sub>, TMS):  $\delta$  170.3, 162.2, 140.9, 140.2,

139.1, 138.7, 136.8, 135.6, 132.6, 131.6, 131.4, 129.9, 129.6, 129.0, 128.4, 128.3, 127.7, 122.4, 121.0, 115.4, 114.1, 112.2, 95.7, 35.0, 22.1; HRMS (ESI)  $m/z$  calcd for  $C_{34}H_{26}Br_2N_3O_2$   $[M + H]^+$ : 666.0386, found: 666.0396.

**2-(2-(4-bromophenyl)-6-methyl-4-oxo-1,5-diphenyl-4,5-dihydro-1H-pyrrolo[3,2-c]pyridin-3-yl)-N-(4-(trifluoromethyl)phenyl)acetamide (9g).**

Pale yellow crystal; Mp: 282-284 °C;  $^1H$  NMR (400 MHz,  $CDCl_3$ , TMS):  $\delta$  11.62 (s, 1H, NH), 7.59-7.71 (m, 4H, ArH), 7.60 (d,  $J = 7.6$  Hz, 1H, ArH), 7.29-7.54 (m, 8H, ArH), 7.17-7.19 (m, 4H, ArH), 7.18 (d,  $J = 6.4$  Hz, 1H, ArH), 6.31 (s, 1H, CH), 3.81 (s, 2H,  $CH_2$ ), 2.03 (s, 3H,  $CH_3$ );  $^{13}C$  NMR (100 MHz,  $CDCl_3$ , TMS):  $\delta$  170.6, 162.3, 142.7, 140.9, 140.3, 139.1, 136.8, 135.7, 132.6, 132.3, 131.6, 131.4, 129.9, 129.7, 129.6, 129.1, 128.3, 127.6, 125.9, 122.4, 119.0, 113.8, 112.1, 95.7, 35.1, 22.1; HRMS (ESI)  $m/z$  calcd for  $C_{35}H_{26}BrF_3N_3O_2$   $[M + H]^+$ : 656.1155, found: 656.1156.

**2-(2-(4-bromophenyl)-6-methyl-4-oxo-1,5-diphenyl-4,5-dihydro-1H-pyrrolo[3,2-c]pyridin-3-yl)-N-(3-chlorophenyl)acetamide (9h).**

Yellow solid; Mp: 286-288 °C;  $^1H$  NMR (400 MHz,  $CDCl_3$ , TMS):  $\delta$  11.47 (s, 1H, NH), 7.65-7.69 (m, 2H, ArH), 7.54-7.59 (m, 3H, ArH), 7.29-7.48 (m, 10H, ArH), 7.18-7.22 (m, 3H, ArH), 7.00 (d,  $J = 7.6$  Hz, 1H, ArH), 6.30 (s, 1H, CH), 3.79 (s, 2H,  $CH_2$ ), 2.03 (s, 3H,  $CH_3$ );  $^{13}C$  NMR (100 MHz,  $CDCl_3$ , TMS):  $\delta$  170.4, 162.2, 140.9, 140.8, 140.3, 139.1, 136.8, 135.6, 134.2, 132.6, 132.4, 131.6, 131.4, 130.0, 129.8, 129.6, 129.0, 128.3, 127.7, 123.1, 122.4, 119.4, 117.4, 114.1, 112.1, 95.7, 35.0, 22.1; HRMS (ESI)  $m/z$  calcd for  $C_{34}H_{26}BrClN_3O_2$   $[M + H]^+$ : 622.0891, found: 622.0885.

**2-(2-(4-bromophenyl)-6-methyl-4-oxo-1,5-diphenyl-4,5-dihydro-1H-pyrrolo[3,2-c]pyridin-3-yl)-N-(2,4-dichlorophenyl)acetamide (9i).**

Yellow crystal; Mp: 283-284 °C;  $^1H$  NMR (400 MHz,  $CDCl_3$ , TMS):  $\delta$  10.55 (s, 1H, NH), 8.19 (d,  $J = 8.4$  Hz, 1H, ArH), 7.57-7.61 (m, 2H, ArH), 7.53 (d,  $J = 7.2$  Hz, 1H, ArH), 7.52-7.54 (m, 5H, ArH), 7.29-7.44 (m, 6H, ArH), 7.21 (s, 3H, ArH), 6.29 (s, 1H, CH), 3.94 (s, 2H,  $CH_2$ ), 2.03 (s, 3H,  $CH_3$ );  $^{13}C$  NMR (100 MHz,  $CDCl_3$ , TMS):  $\delta$  171.0, 161.8, 140.4, 140.2, 138.8, 136.9, 135.2, 134.6, 132.5, 131.3, 129.7, 129.6, 129.0, 128.8, 128.6, 128.5, 128.2, 127.6, 127.1, 125.5, 124.8, 122.3, 114.0, 112.4, 95.3, 34.6, 22.2; HRMS (ESI)  $m/z$  calcd for  $C_{34}H_{25}BrCl_2N_3O_2$   $[M + H]^+$ : 656.0502, found: 656.0509.

**2-(2-(4-bromophenyl)-6-methyl-4-oxo-1,5-diphenyl-4,5-dihydro-1H-pyrrolo[3,2-**

**c]pyridin-3-yl)-N-(2,4-dimethylphenyl)acetamide (9j).**

White crystal; Mp: 248-250 °C; <sup>1</sup>H NMR (400 MHz, CDCl<sub>3</sub>, TMS): δ 10.19 (s, 1H, NH), 7.76 (d, *J* = 8.0 Hz, 1H, ArH), 7.56-7.60 (m, 2H, ArH), 7.53 (d, *J* = 6.8 Hz, 1H, ArH), 7.41-7.45 (m, 8H, ArH), 7.20-7.29 (m, 5H, ArH), 6.99 (d, *J* = 8.0 Hz, 1H, ArH), 6.96 (s, 1H, ArH), 6.30 (s, 1H, CH), 3.88 (s, 2H, CH<sub>2</sub>), 2.29 (s, 3H, CH<sub>3</sub>), 2.16 (s, 3H, CH<sub>3</sub>), 2.03 (s, 3H, CH<sub>3</sub>); <sup>13</sup>C NMR (100 MHz, CDCl<sub>3</sub>, TMS): δ 170.6, 161.9, 140.5, 140.1, 139.0, 137.0, 135.3, 134.3, 133.8, 132.7, 131.3, 131.0, 129.7, 129.6, 128.8, 128.5, 128.1, 127.7, 126.6, 123.4, 122.2, 114.9, 112.4, 95.4, 34.4, 22.2, 20.9, 18.3; HRMS (ESI) *m/z* calcd for C<sub>36</sub>H<sub>31</sub>BrN<sub>3</sub>O<sub>2</sub> [M + H]<sup>+</sup>: 616.1594, found: 616.1597.

**2-(2-(4-bromophenyl)-6-methyl-4-oxo-1,5-diphenyl-4,5-dihydro-1H-pyrrolo[3,2-c]pyridin-3-yl)-N-(2,6-dimethylphenyl)acetamide (9k).**

Yellow solid; Mp: 228-230 °C; <sup>1</sup>H NMR (400 MHz, CDCl<sub>3</sub>, TMS): δ 10.29 (s, 1H, NH), 7.93 (d, *J* = 8.0 Hz, 1H, ArH), 7.52-7.61 (m, 4H, ArH), 7.41-7.44 (m, 8H, ArH), 7.27-7.31 (m, 3H, ArH), 7.13-7.22 (m, 5H, ArH), 7.02 (d, *J* = 7.2 Hz, 1H, ArH), 6.31 (s, 1H, CH), 3.90 (s, 2H, CH<sub>2</sub>), 2.21 (s, 3H, CH<sub>3</sub>), 2.02 (s, 6H, CH<sub>3</sub>); <sup>13</sup>C NMR (100 MHz, CDCl<sub>3</sub>, TMS): δ 170.7, 161.9, 140.6, 140.1, 138.9, 137.0, 136.9, 135.3, 132.7, 132.4, 131.6, 131.3, 130.3, 129.9, 129.8, 129.7, 129.6, 128.8, 128.5, 128.3, 128.2, 127.6, 126.1, 124.3, 123.2, 122.2, 114.7, 112.4, 95.5, 34.5, 22.2, 18.5; HRMS (ESI) *m/z* calcd for C<sub>36</sub>H<sub>31</sub>BrN<sub>3</sub>O<sub>2</sub> [M + H]<sup>+</sup>: 616.1594, found: 616.1593.

**2-(2-(4-bromophenyl)-6-methyl-4-oxo-1,5-di-p-tolyl-4,5-dihydro-1H-pyrrolo[3,2-c]pyridin-3-yl)-N-(p-tolyl)acetamide (9l).**

White crystal; Mp: 263-264 °C; <sup>1</sup>H NMR (400 MHz, CDCl<sub>3</sub>, TMS): δ 11.14 (s, 1H, NH), 7.42-7.50 (m, 8H, ArH), 7.17-7.29 (m, 4H, ArH), 7.04-7.10 (m, 4H, ArH), 6.25 (s, 1H, CH), 3.78 (s, 2H, CH<sub>2</sub>), 2.51 (s, 3H, CH<sub>3</sub>), 2.41 (s, 3H, CH<sub>3</sub>), 2.31 (s, 3H, CH<sub>3</sub>), 2.01 (s, 3H, CH<sub>3</sub>); <sup>13</sup>C NMR (100 MHz, CDCl<sub>3</sub>, TMS): δ 170.1, 162.3, 140.8, 140.1, 138.8, 138.1, 137.1, 136.5, 135.4, 134.3, 132.7, 132.5, 131.3, 130.5, 130.2, 129.1, 128.7, 128.1, 127.4, 122.1, 119.4, 114.3, 112.1, 95.5, 34.9, 22.1, 21.3, 21.2, 20.9; HRMS (ESI) *m/z* calcd for C<sub>37</sub>H<sub>33</sub>BrN<sub>3</sub>O<sub>2</sub> [M + H]<sup>+</sup>: 630.1751, found: 630.1755.

**2-(2-(4-bromophenyl)-1,5-bis(4-methoxyphenyl)-6-methyl-4-oxo-4,5-dihydro-1H-pyrrolo[3,2-c]pyridin-3-yl)-N-(p-tolyl)acetamide (9m).**

Pale yellow crystal; Mp: 237-238 °C; <sup>1</sup>H NMR (400 MHz, CDCl<sub>3</sub>, TMS): δ 11.14 (s, 1H,

NH), 7.42-7.50 (m, 6H, ArH), 7.20-7.29 (m, 2H, ArH), 7.08-7.7.14 (m, 6H, ArH), 6.93 (d,  $J = 8.4$  Hz, 2H, ArH), 6.22 (s, 1H, CH), 3.94 (s, 3H, OMe), 3.85 (s, 3H, OMe), 3.78 (s, 2H, CH<sub>2</sub>), 2.31 (s, 3H, CH<sub>3</sub>), 2.02 (s, 3H, CH<sub>3</sub>); <sup>13</sup>C NMR (100 MHz, CDCl<sub>3</sub>, TMS):  $\delta$  170.1, 162.5, 159.6, 159.1, 141.0, 140.4, 137.1, 135.5, 132.7, 132.5, 131.8, 131.3, 129.6, 129.3, 129.2, 128.8, 128.6, 122.1, 119.4, 115.0, 114.7, 114.2, 112.0, 95.5, 55.6, 55.5, 34.9, 22.2, 20.9; HRMS (ESI)  $m/z$  calcd for C<sub>37</sub>H<sub>33</sub>BrN<sub>3</sub>O<sub>4</sub> [M + H]<sup>+</sup>: 662.1649, found: 662.1655.

**2-(2-(4-bromophenyl)-1,5-bis(4-fluorophenyl)-6-methyl-4-oxo-4,5-dihydro-1H-pyrrolo[3,2-c]pyridin-3-yl)-N-(p-tolyl)acetamide (9n).**

White crystal; Mp: 260-262 °C; <sup>1</sup>H NMR (400 MHz, DMSO-*d*<sub>6</sub>, TMS):  $\delta$  10.66 (s, 1H, NH), 7.55 (d,  $J = 8.0$  Hz, 2H, ArH), 7.30-7.43 (m, 12H, ArH), 7.08 (d,  $J = 8.0$  Hz, 2H, ArH), 6.31 (s, 1H, CH), 3.67 (s, 2H, CH), 2.24 (s, 3H, CH<sub>3</sub>), 1.95 (s, 3H, CH<sub>3</sub>); <sup>13</sup>C NMR (100 MHz, DMSO-*d*<sub>6</sub>, TMS):  $\delta$  169.3, 163.0, 161.8 (<sup>1</sup> $J_{CF} = 243.2$  Hz), 161.3 (<sup>1'</sup> $J_{CF} = 243.2$  Hz), 141.3, 140.9, 137.3, 135.6, 135.1, 133.1, 133.0, 132.5, 132.3, 131.8, 131.6, 131.3 (<sup>3</sup> $J_{CF} = 9.0$  Hz), 130.5 (<sup>3'</sup> $J_{CF} = 8.0$  Hz), 129.6, 129.3, 122.1, 119.2, 117.1, 116.7 (<sup>2</sup> $J_{CF} = 22.2$  Hz), 116.5 (<sup>2'</sup> $J_{CF} = 22.2$  Hz), 114.0, 111.8, 95.0, 34.4, 22.0, 20.8; HRMS (ESI)  $m/z$  calcd for C<sub>35</sub>H<sub>27</sub>BrF<sub>2</sub>N<sub>3</sub>O<sub>2</sub> [M + H]<sup>+</sup>: 638.1249, found: 638.1248.

**2-(1,5-dibenzyl-2-(4-bromophenyl)-6-methyl-4-oxo-4,5-dihydro-1H-pyrrolo[3,2-c]pyridin-3-yl)-N-(p-tolyl)acetamide (9o).**

Pale yellow solid; Mp: 261-262 °C; <sup>1</sup>H NMR (400 MHz, CDCl<sub>3</sub>, TMS):  $\delta$  11.16 (s, 1H, NH), 7.59 (d,  $J = 8.0$  Hz, 2H, ArH), 7.60 (d,  $J = 8.0$  Hz, 2H, ArH), 7.29-7.38 (m, 8H, ArH), 7.19 (s, 2H, ArH), 6.99 (d,  $J = 8.0$  Hz, 3H, ArH), 6.20 (s, 1H, CH), 5.55 (s, 2H, CH<sub>2</sub>), 5.15 (s, 2H, CH<sub>2</sub>), 3.75 (s, 2H, CH<sub>2</sub>), 2.36 (s, 3H, CH<sub>3</sub>), 2.29 (s, 3H, CH<sub>3</sub>); <sup>13</sup>C NMR (100 MHz, CDCl<sub>3</sub>, TMS):  $\delta$  170.0, 161.8, 139.9, 139.8, 137.1, 137.0, 136.9, 135.9, 132.8, 132.4, 131.7, 129.1, 129.0, 128.9, 128.4, 127.7, 127.3, 126.1, 125.8, 123.2, 119.4, 113.5, 112.0, 95.9, 47.9, 47.0, 35.1, 21.4, 20.9; HRMS (ESI)  $m/z$  calcd for C<sub>37</sub>H<sub>33</sub>BrN<sub>3</sub>O<sub>2</sub> [M + H]<sup>+</sup>: 630.1751, found: 630.1751.

**2-(2-(4-fluorophenyl)-6-methyl-4-oxo-1,5-diphenyl-4,5-dihydro-1H-pyrrolo[3,2-c]pyridin-3-yl)-N-(p-tolyl)acetamide (9p).**

Gray powder; Mp: >300 °C; <sup>1</sup>H NMR (400 MHz, CDCl<sub>3</sub>, TMS):  $\delta$  11.15 (s, 1H, NH), 7.64 (d,  $J = 7.6$  Hz, 2H, ArH), 7.41-7.65 (m, 10H, ArH), 6.29 (s, 1H, CH), 3.80 (s, 2H,

CH<sub>2</sub>), 2.32 (s, 3H, CH<sub>3</sub>), 2.02 (s, 3H, CH<sub>3</sub>); <sup>13</sup>C NMR (100 MHz, CDCl<sub>3</sub>, TMS): δ 170.2, 162.2 (<sup>1</sup>J<sub>CF</sub> = 242.2 Hz), 140.6, 139.9, 139.2, 137.1, 137.0, 135.6, 133.1, 133.0, 132.5, 129.9, 129.5, 129.2, 129.0, 128.9, 128.5, 128.3, 128.1, 127.7, 126.2, 125.7, 121.1, 119.3, 115.2 (<sup>2</sup>J<sub>CF</sub> = 21.2 Hz), 114.1, 112.2, 95.6, 34.9, 22.1, 20.9; HRMS (ESI) m/z calcd for C<sub>35</sub>H<sub>29</sub>FN<sub>3</sub>O<sub>2</sub> [M + H]<sup>+</sup>: 542.2238, found: 542.2247.

**2-(2-(4-methoxyphenyl)-6-methyl-4-oxo-1,5-diphenyl-4,5-dihydro-1H-pyrrolo[3,2-c]pyridin-3-yl)-N-(p-tolyl)acetamide (9q).**

White powder; Mp: >300 °C; <sup>1</sup>H NMR (400 MHz, CDCl<sub>3</sub>, TMS): δ 11.20 (s, 1H, NH), 7.51-7.67 (m, 7H, ArH), 7.29-7.47 (m, 6H, ArH), 7.19 (d, *J* = 8.0 Hz, 2H, ArH), 7.10 (d, *J* = 8.0 Hz, 2H, ArH), 6.88 (d, *J* = 8.0 Hz, 2H, ArH), 6.29 (s, 1H, CH), 3.82 (s, 5H, OMe + CH<sub>2</sub>), 2.32 (s, 3H, CH<sub>3</sub>), 2.01 (s, 3H, CH<sub>3</sub>); <sup>13</sup>C NMR (100 MHz, CDCl<sub>3</sub>, TMS): δ 170.4, 162.2, 159.1, 140.3, 139.5, 139.3, 137.2, 136.6, 132.5, 132.3, 129.9, 129.8, 129.5, 129.4, 129.2, 129.1, 128.8, 128.5, 128.3, 127.9, 127.8, 125.7, 121.9, 121.1, 119.3, 113.5, 112.2, 95.7, 55.2, 35.0, 22.1, 20.9; HRMS (ESI) m/z calcd for C<sub>36</sub>H<sub>32</sub>N<sub>3</sub>O<sub>3</sub> [M + H]<sup>+</sup>: 554.2438, found: 554.2440.

**<sup>1</sup>H and <sup>13</sup>C NMR Spectra**

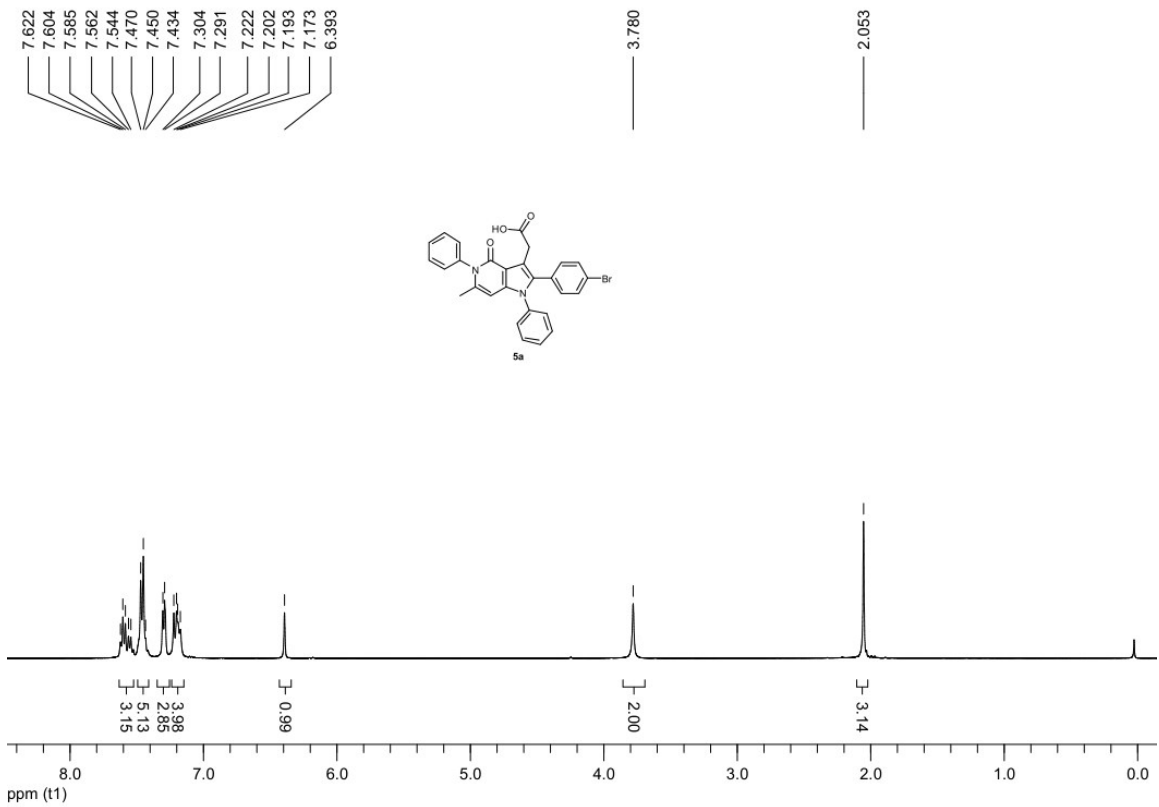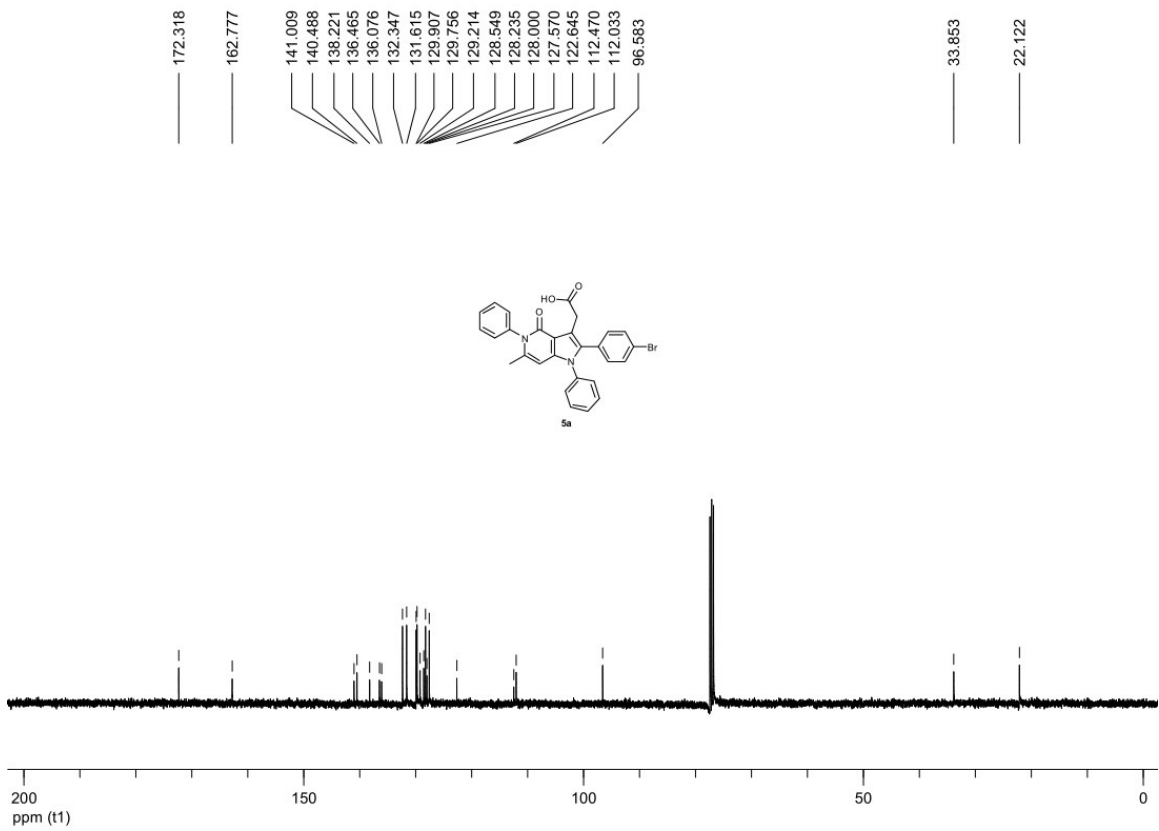



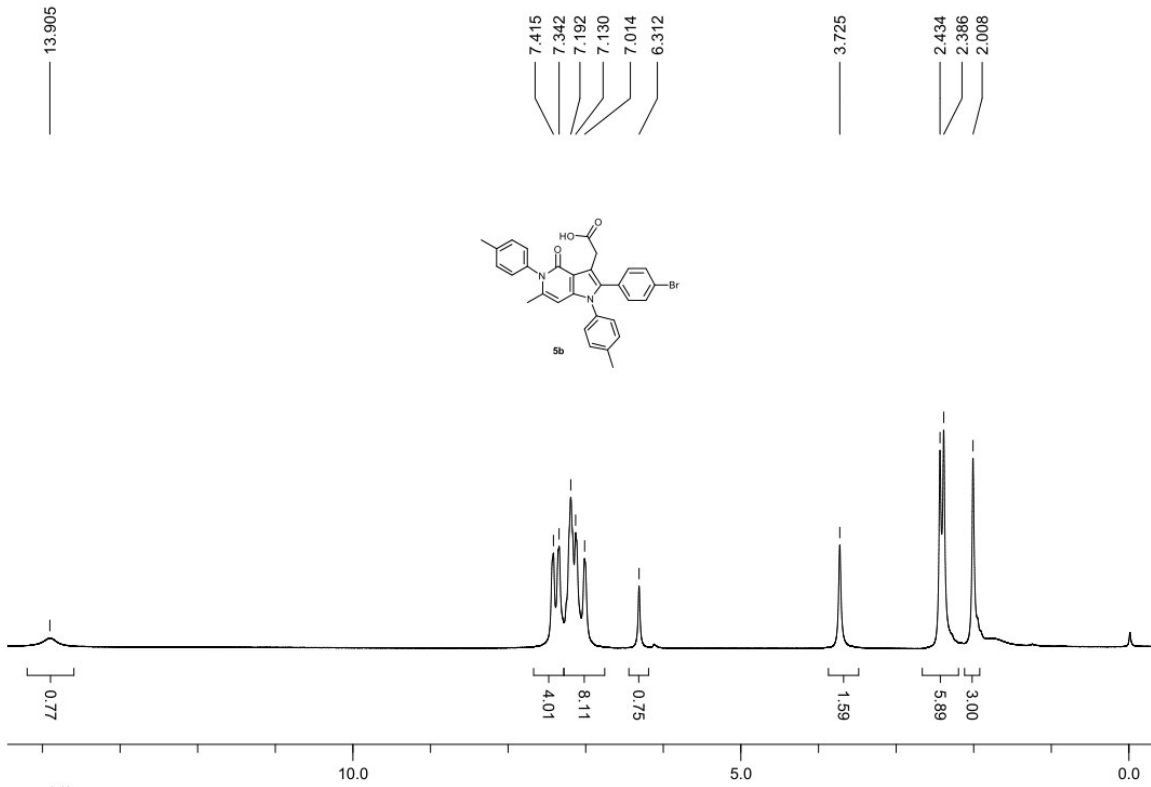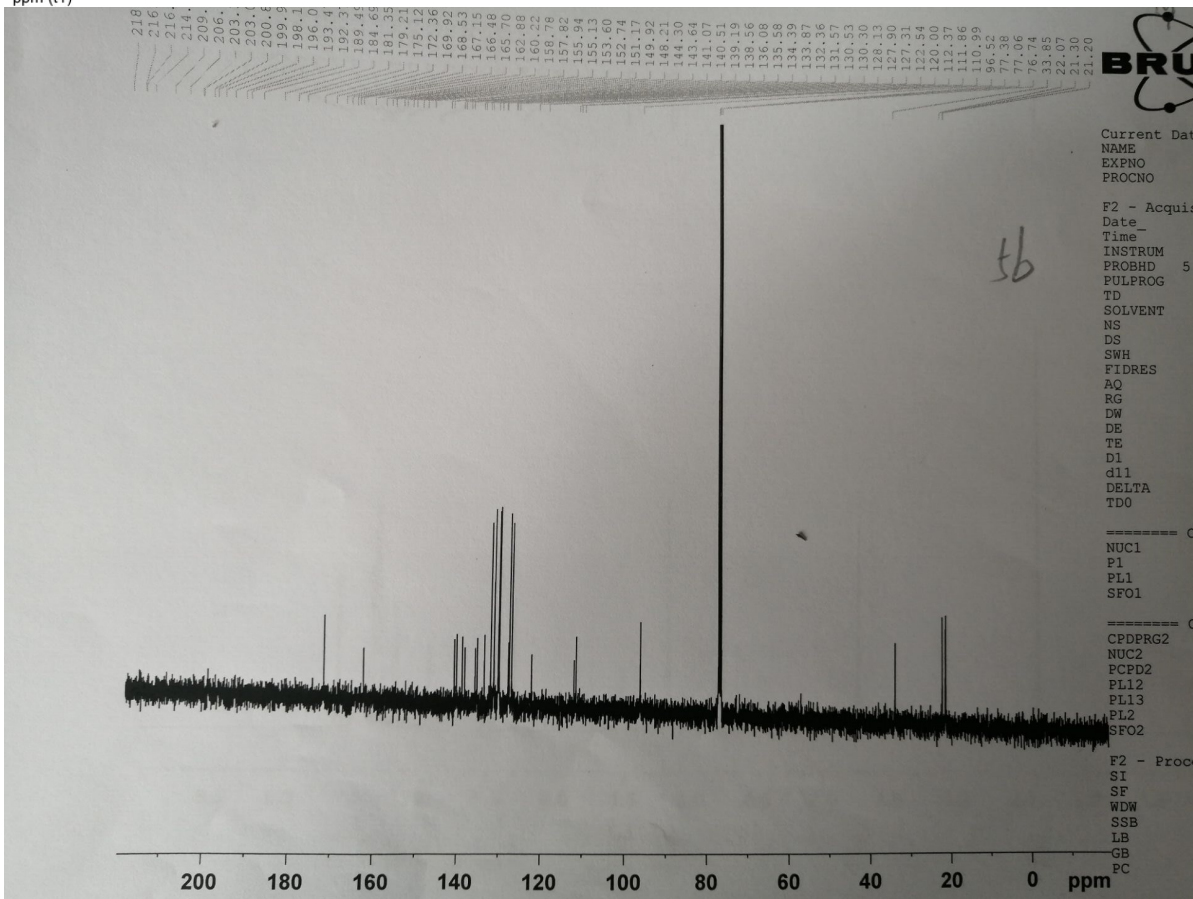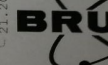

Current Data  
 NAME  
 EXPNO  
 PROCNO  
 F2 - Acquisition  
 Date  
 Time  
 INSTRUM  
 PROBHD  
 PULPROG  
 TD  
 SOLVENT  
 NS  
 DS  
 SWH  
 FIDRES  
 AQ  
 RG  
 DW  
 DE  
 TE  
 D1  
 d11  
 DELTA  
 TD0  
 ===== C  
 NUC1  
 P1  
 PL1  
 SF01  
 ===== C  
 CPDPRG2  
 NUC2  
 PCPD2  
 PL12  
 PL13  
 PL2  
 SF02  
 F2 - Process  
 SI  
 SF  
 WDW  
 SSB  
 LB  
 GB  
 PC

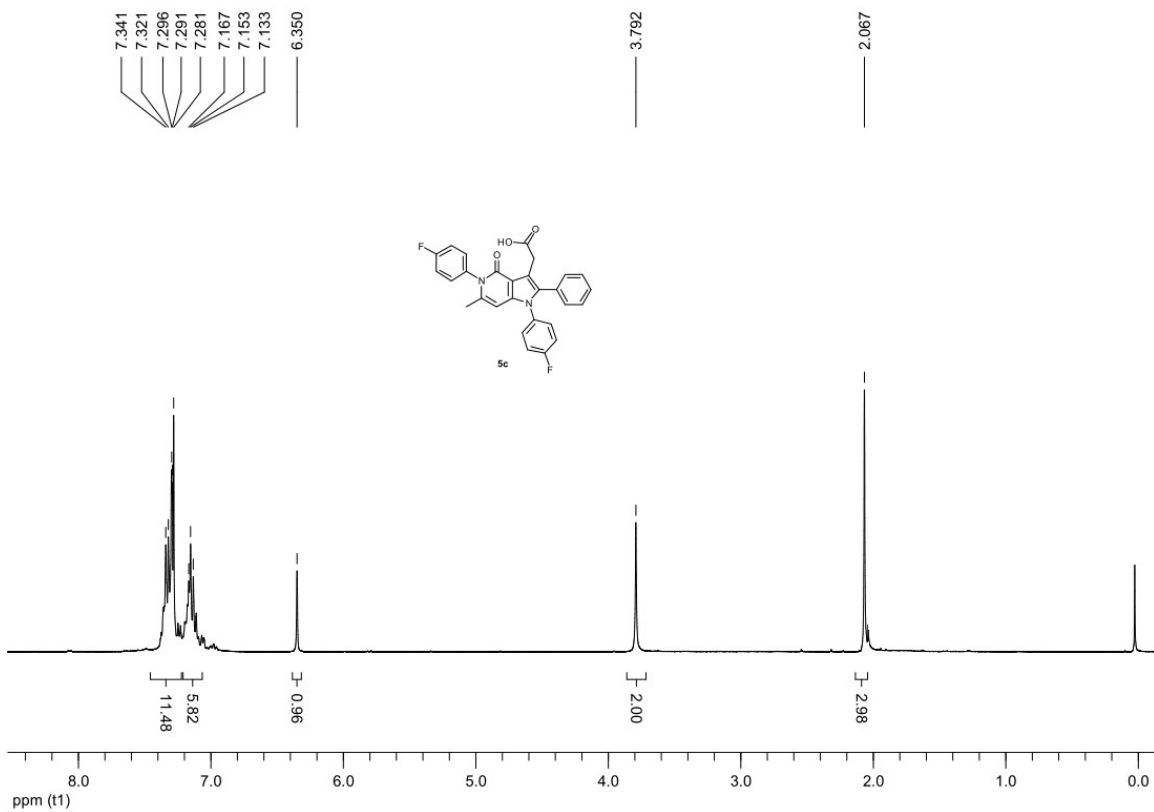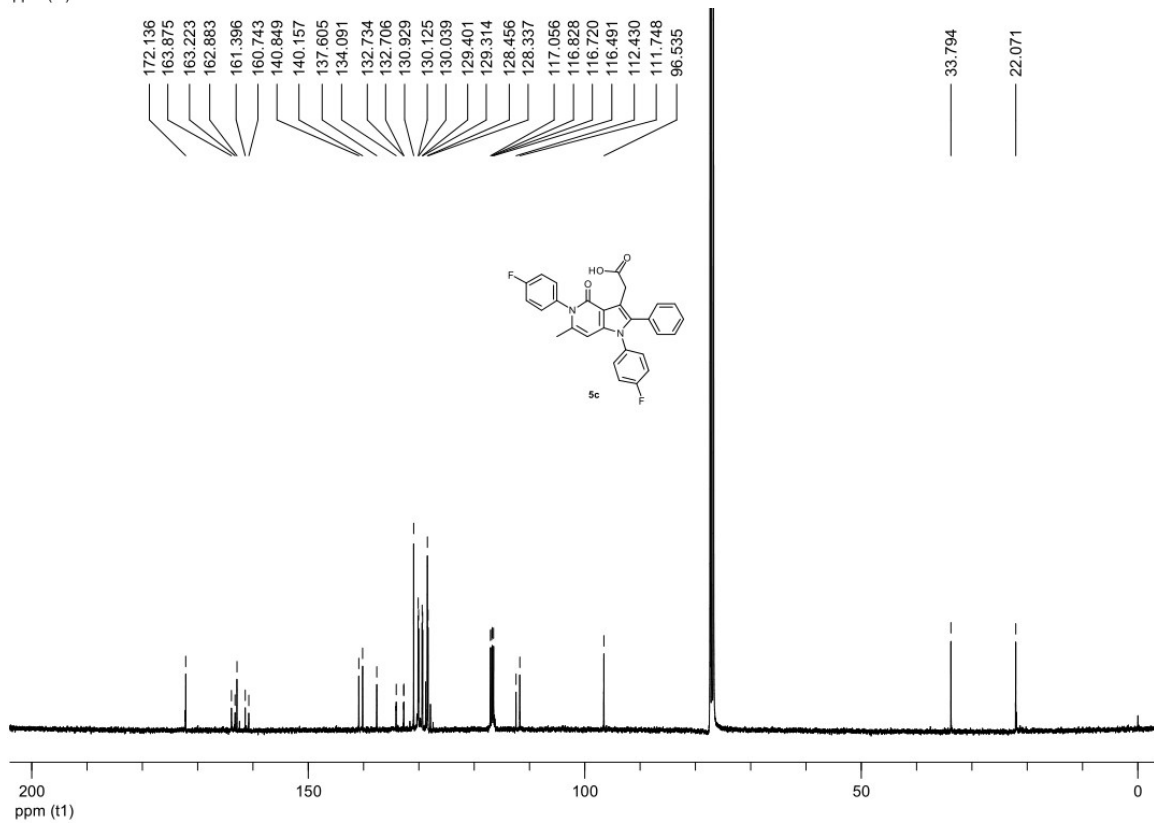

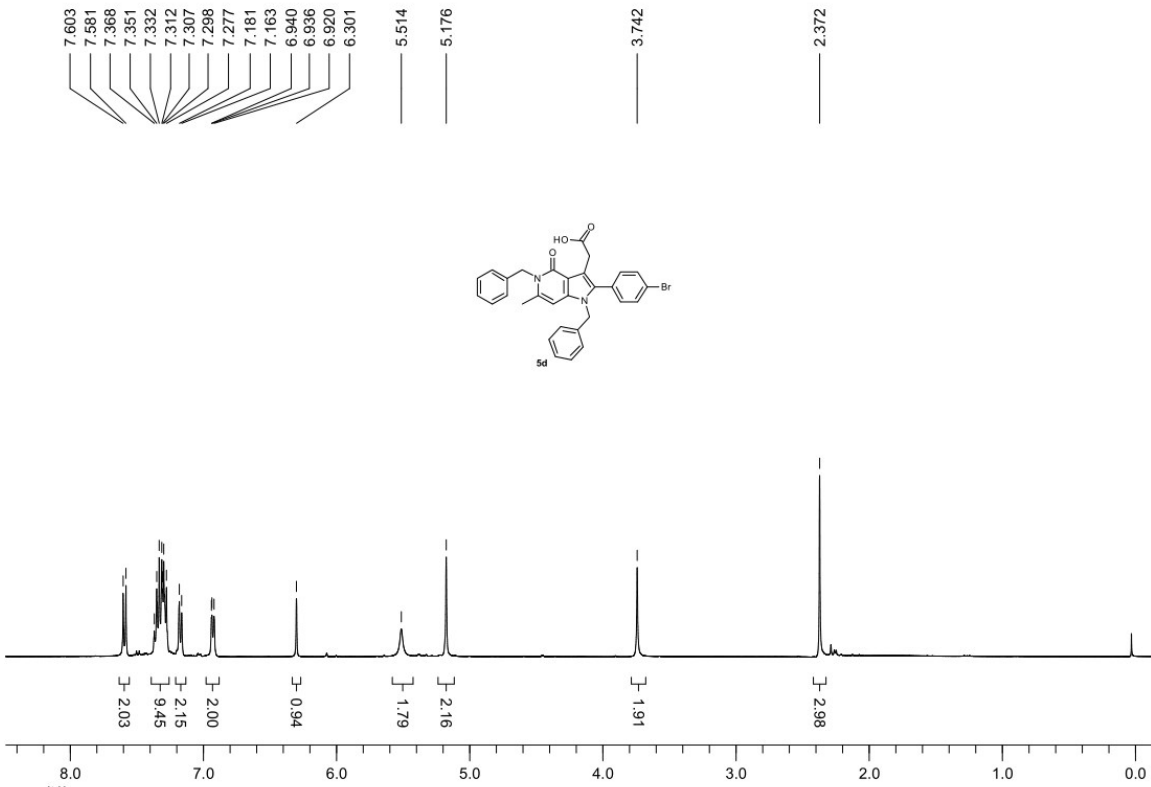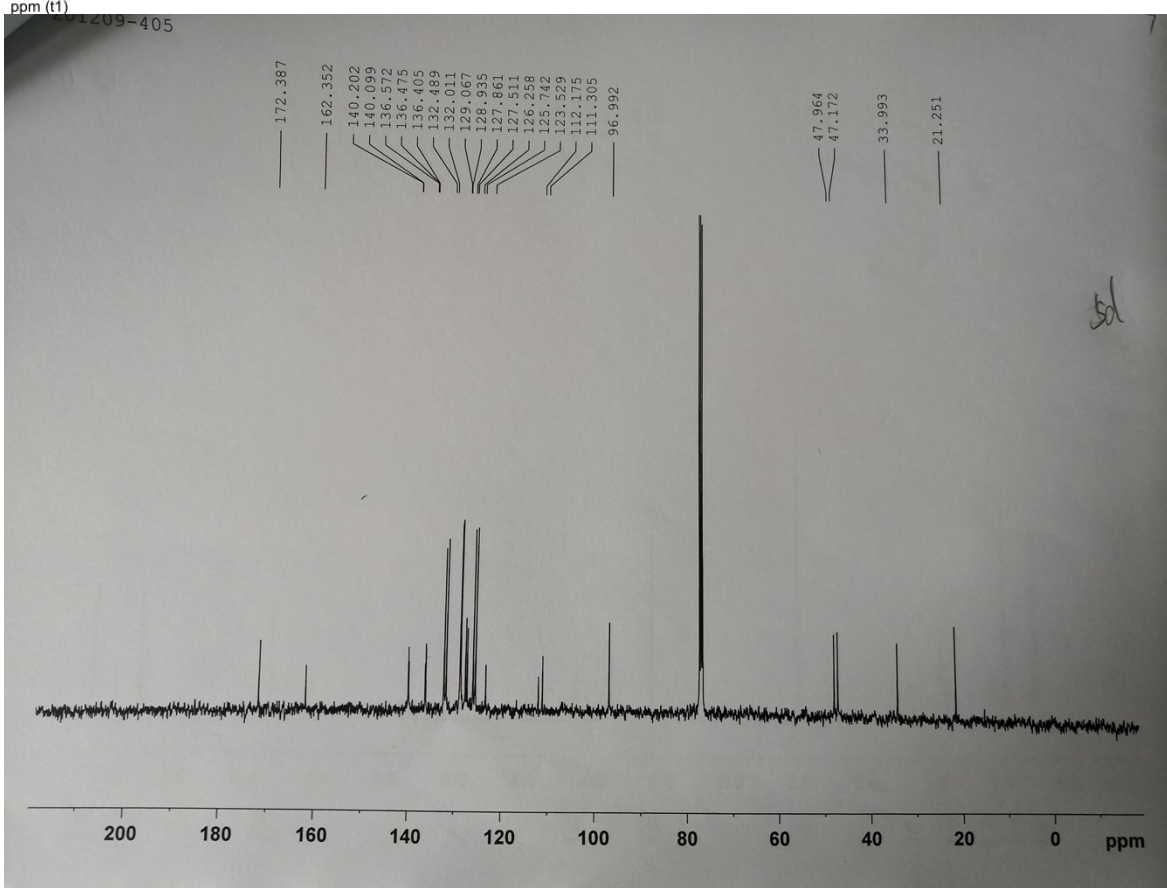

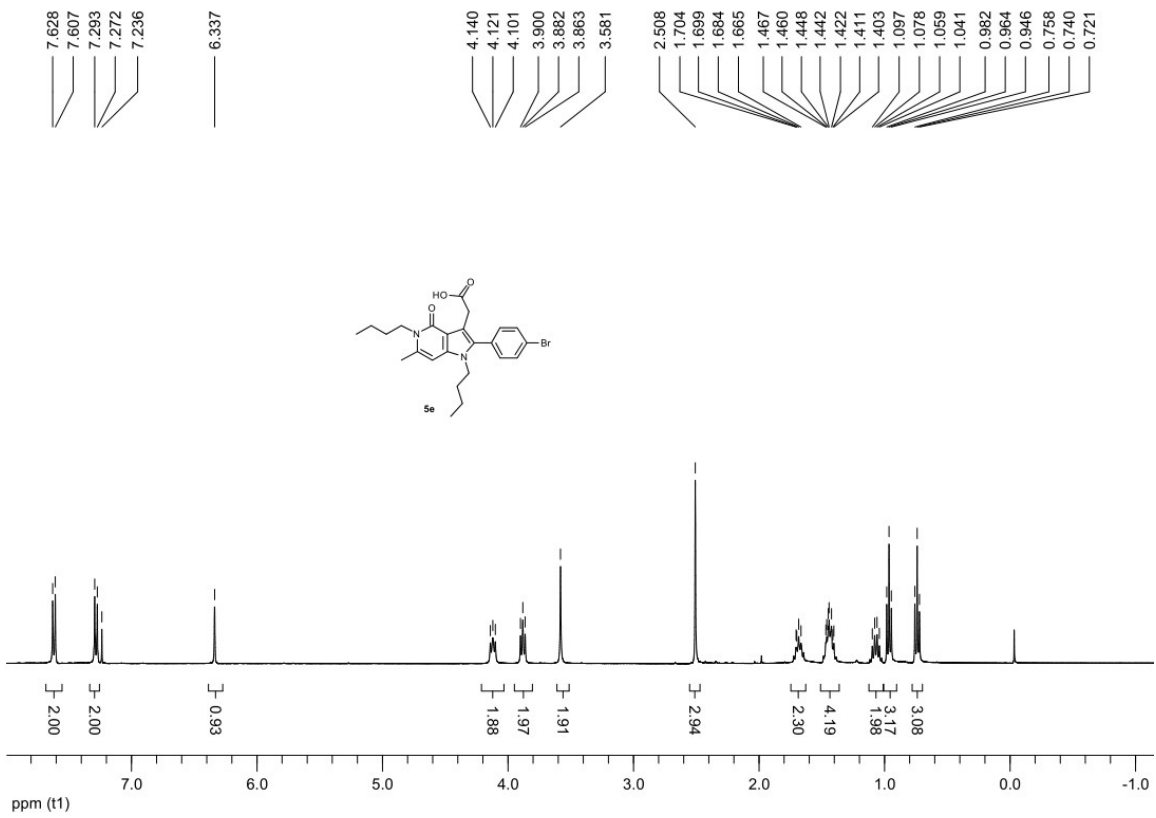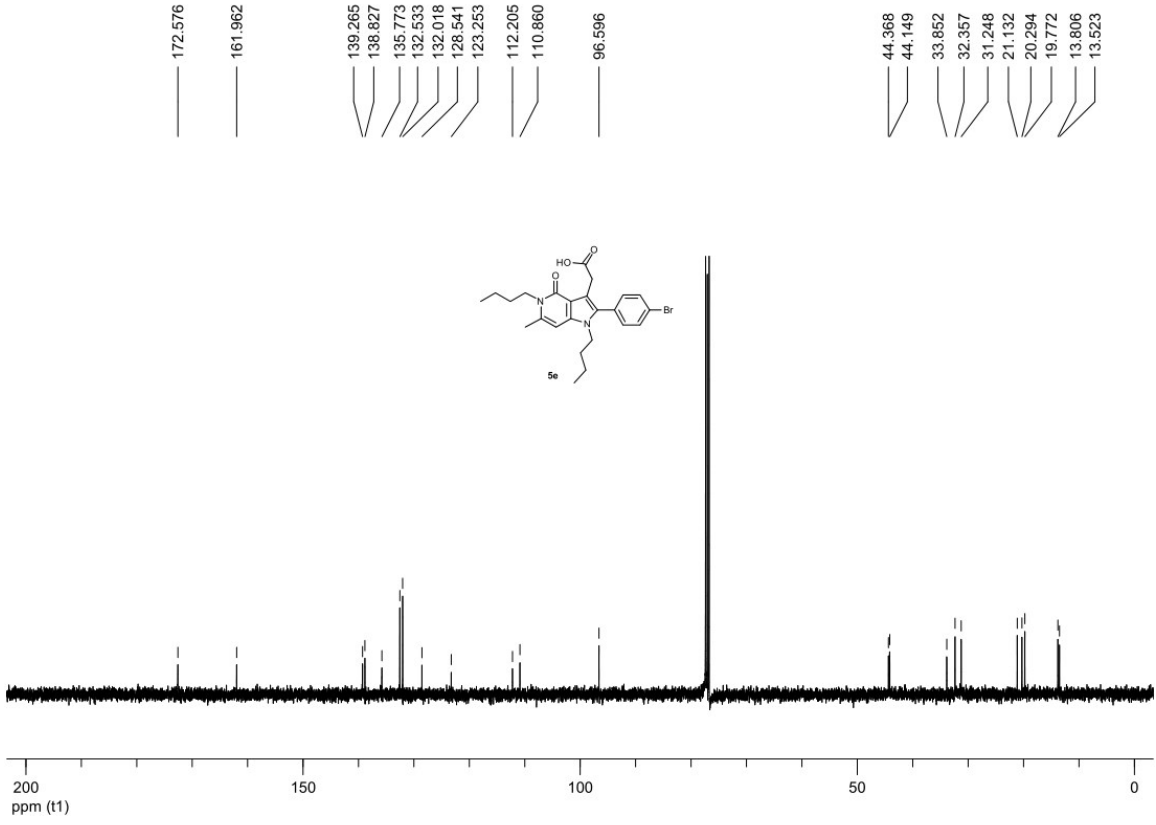

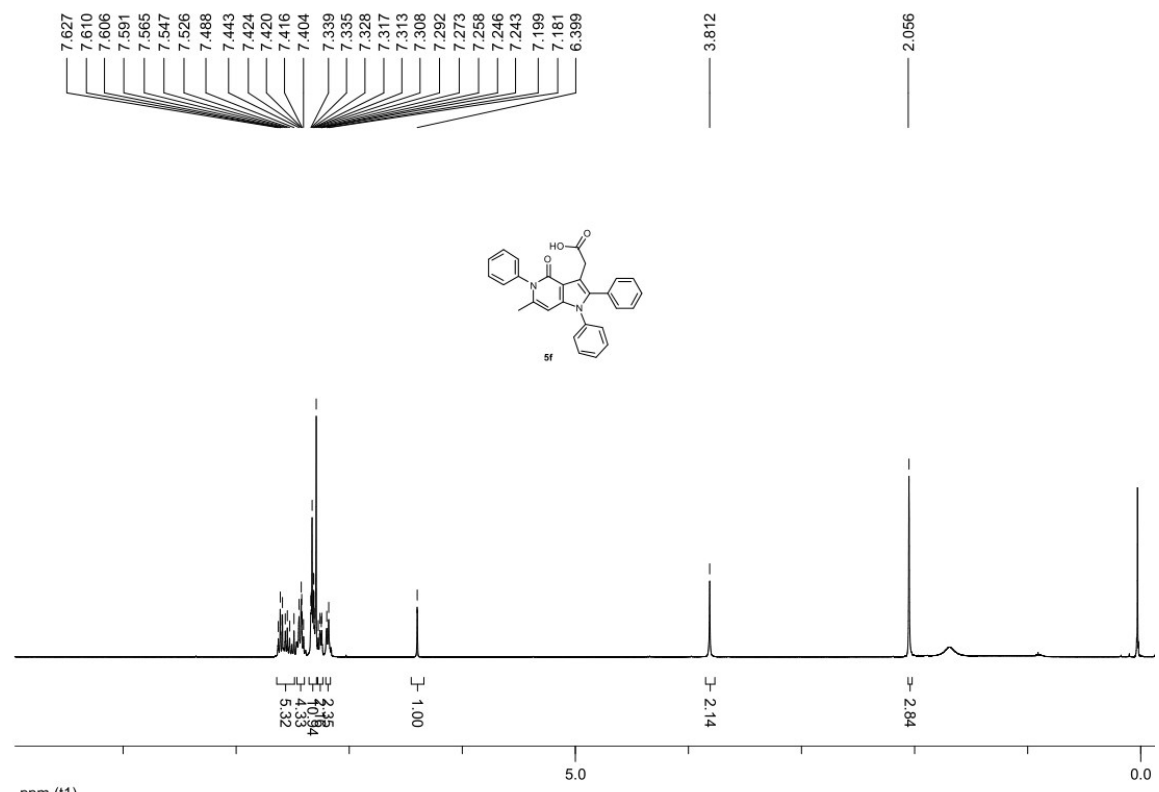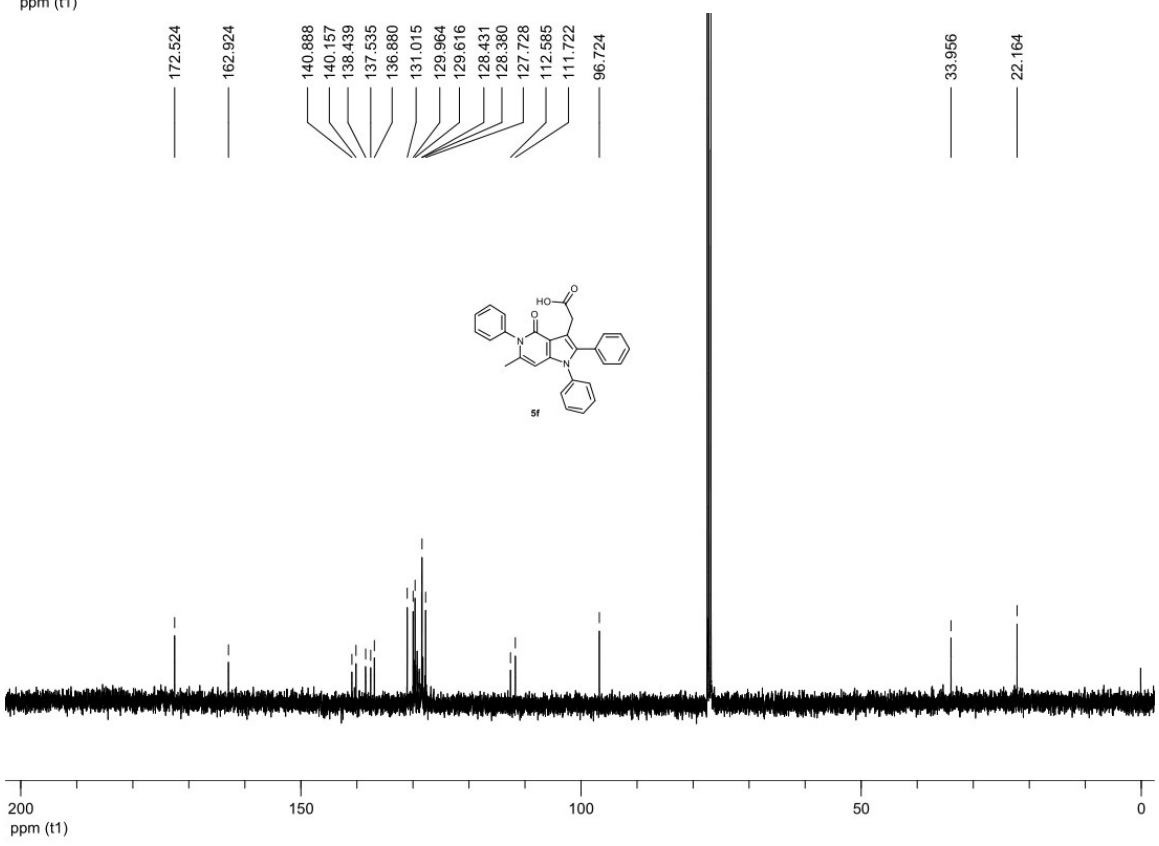

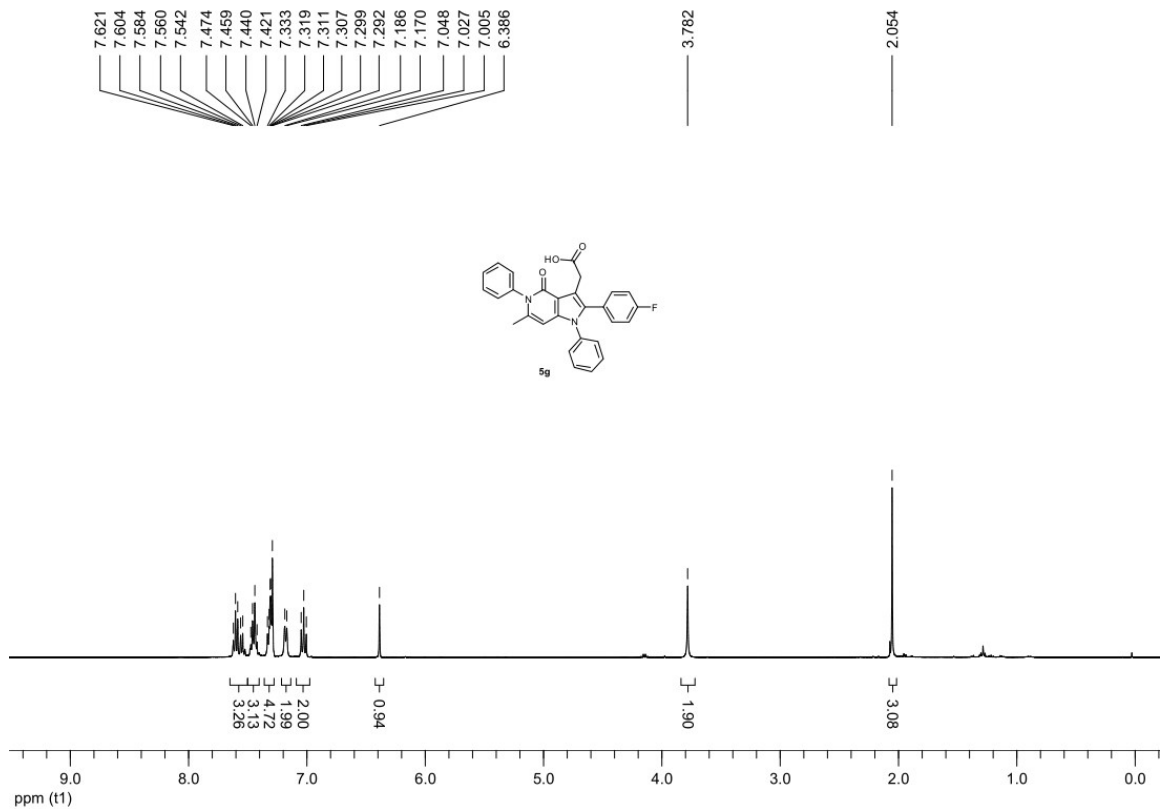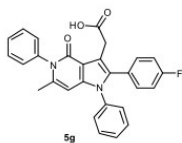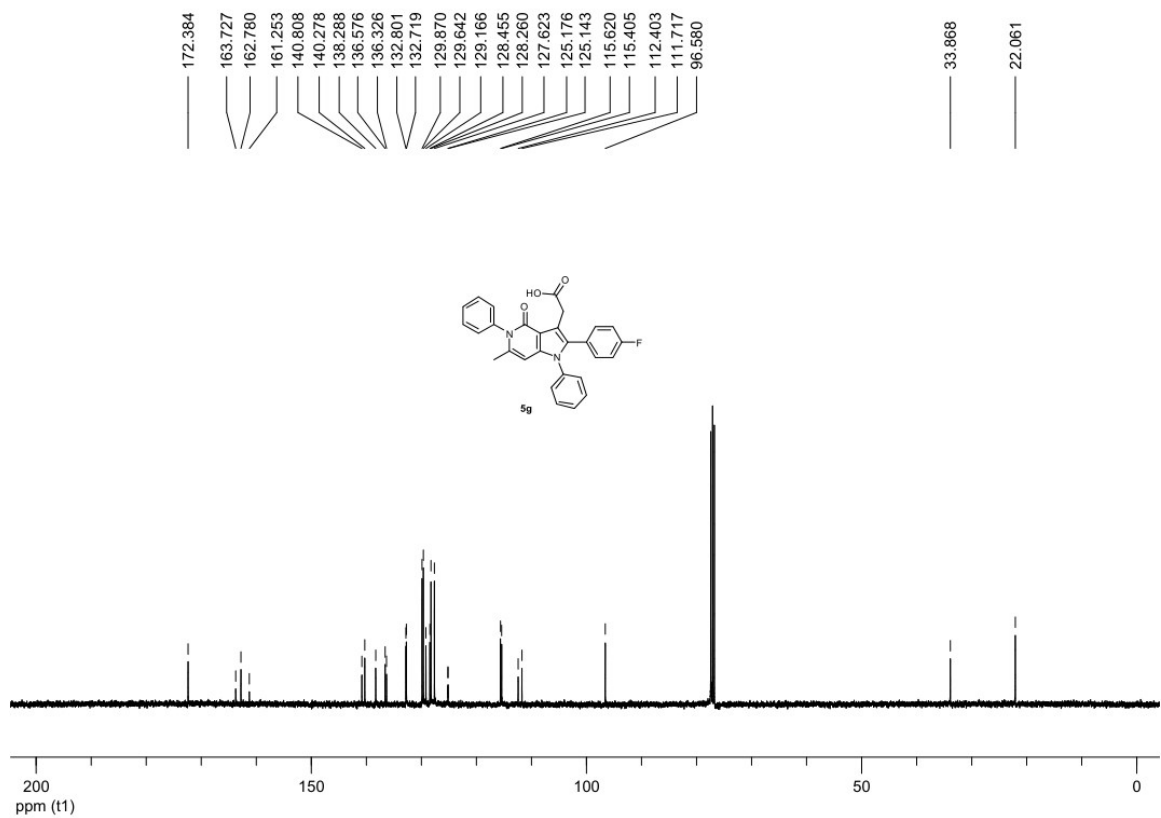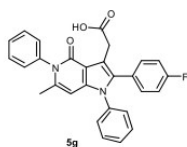

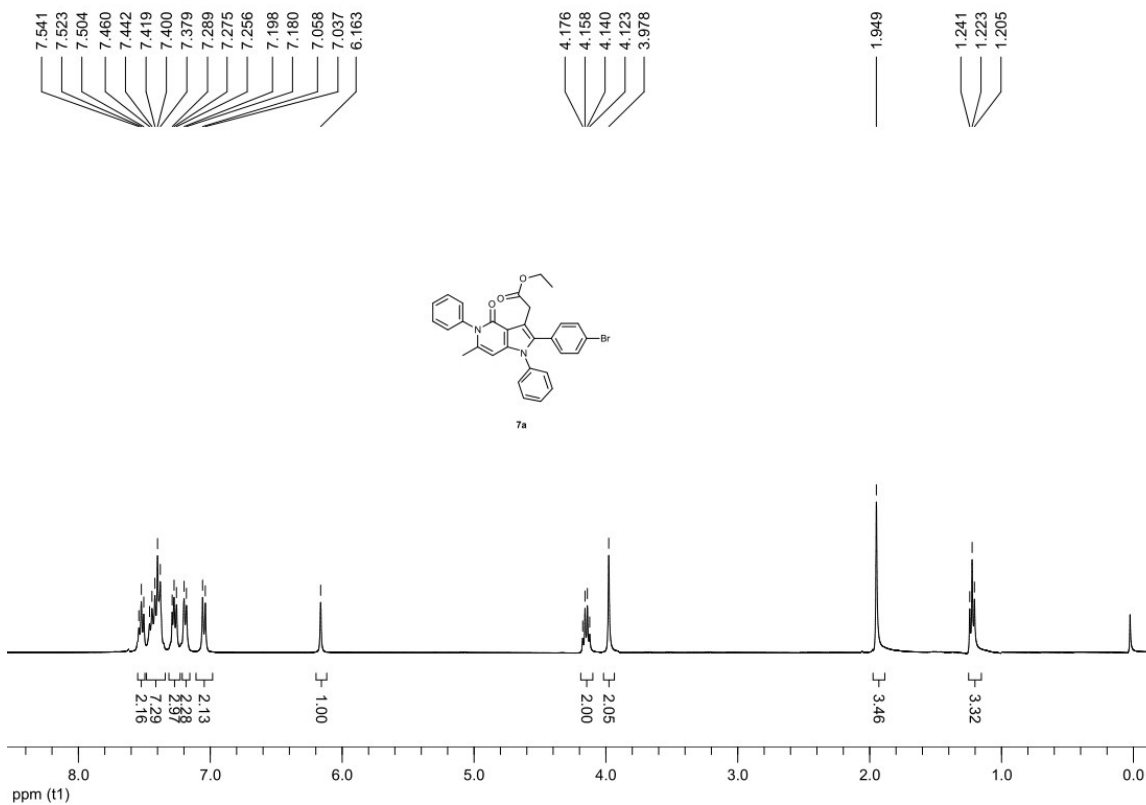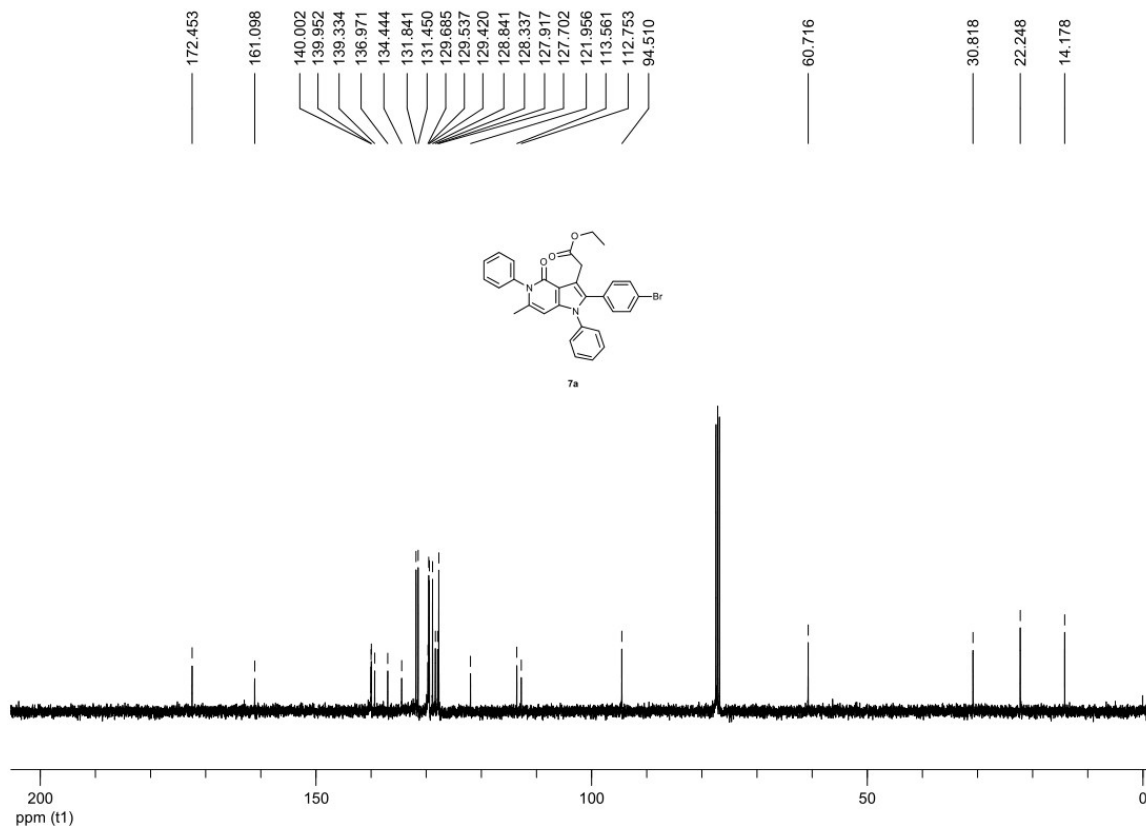

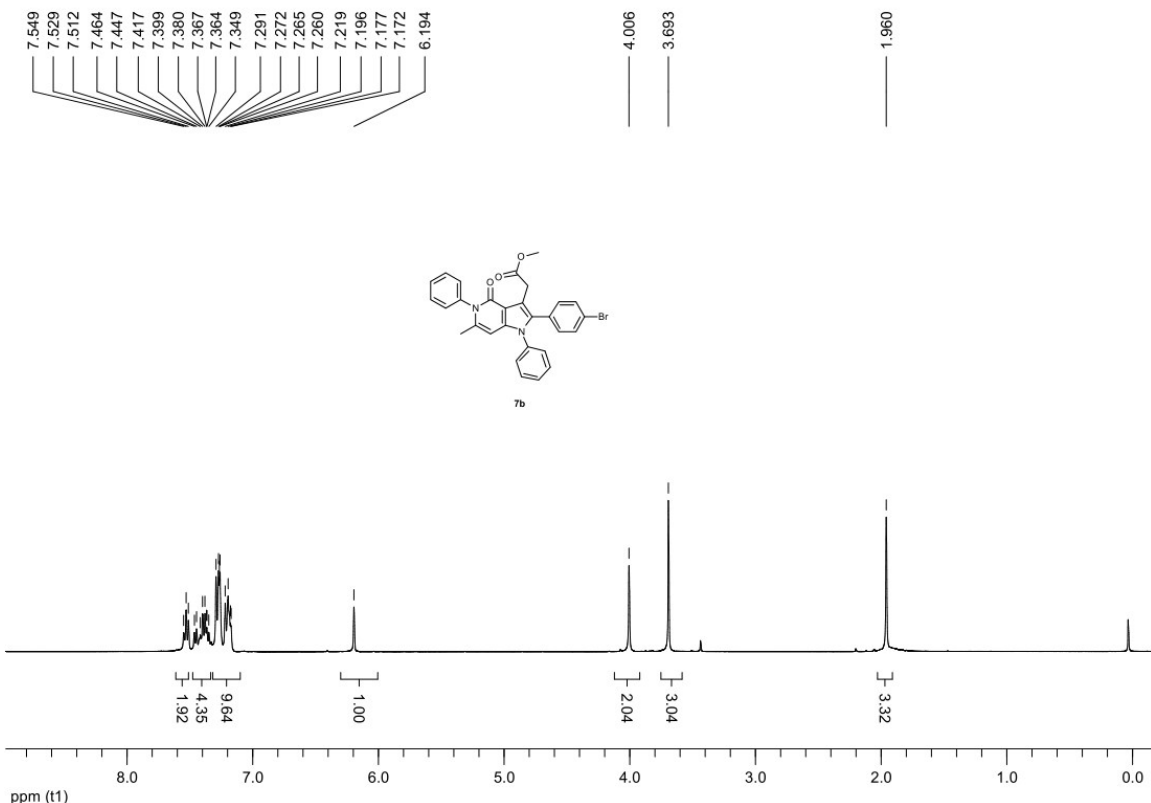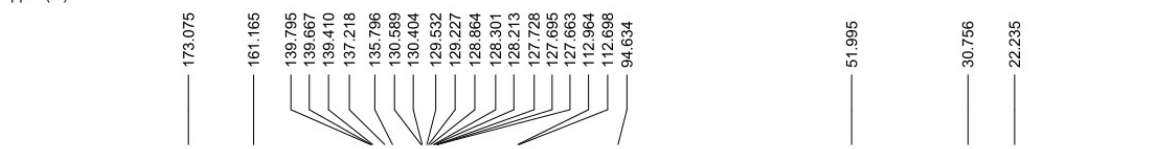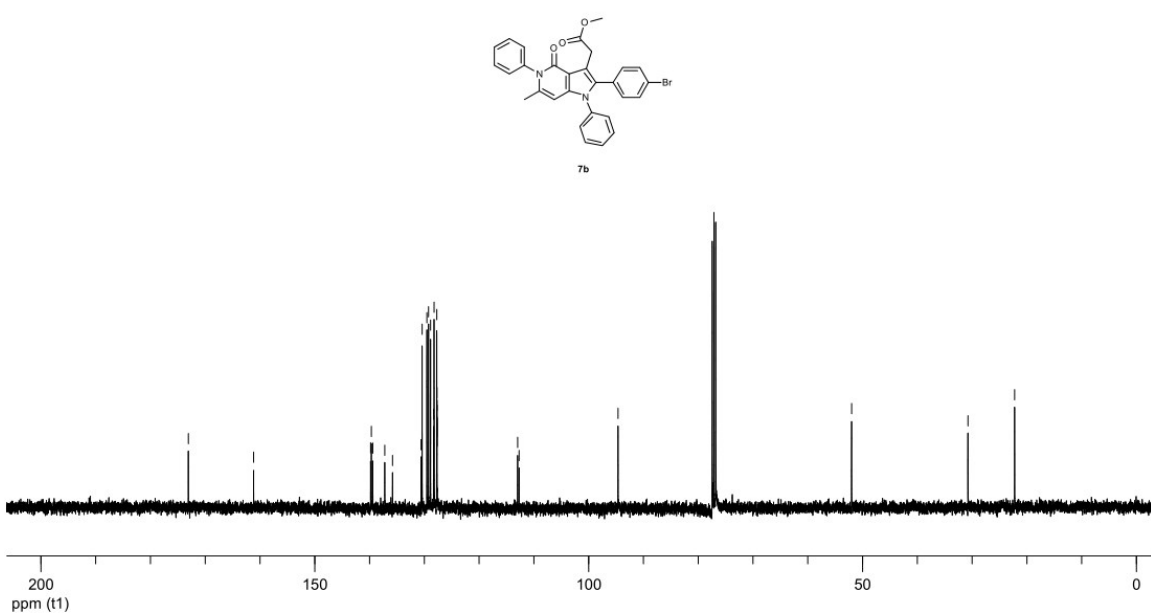



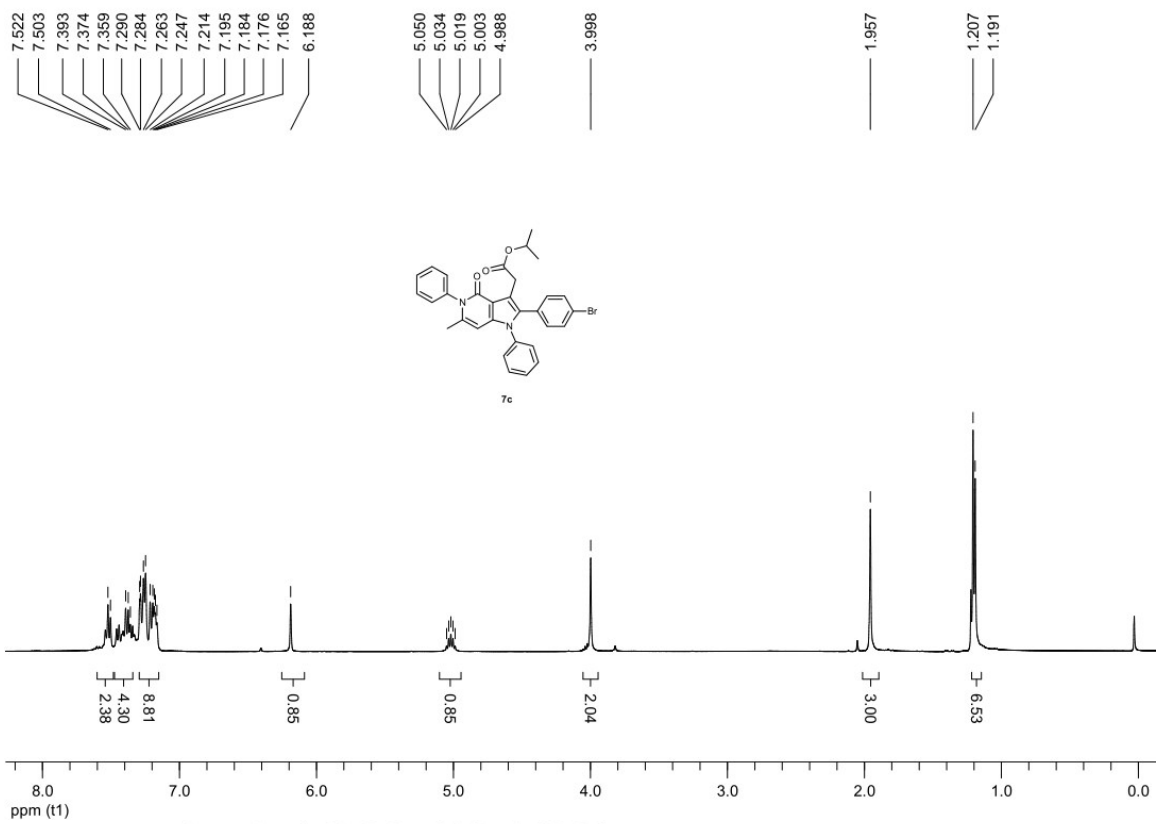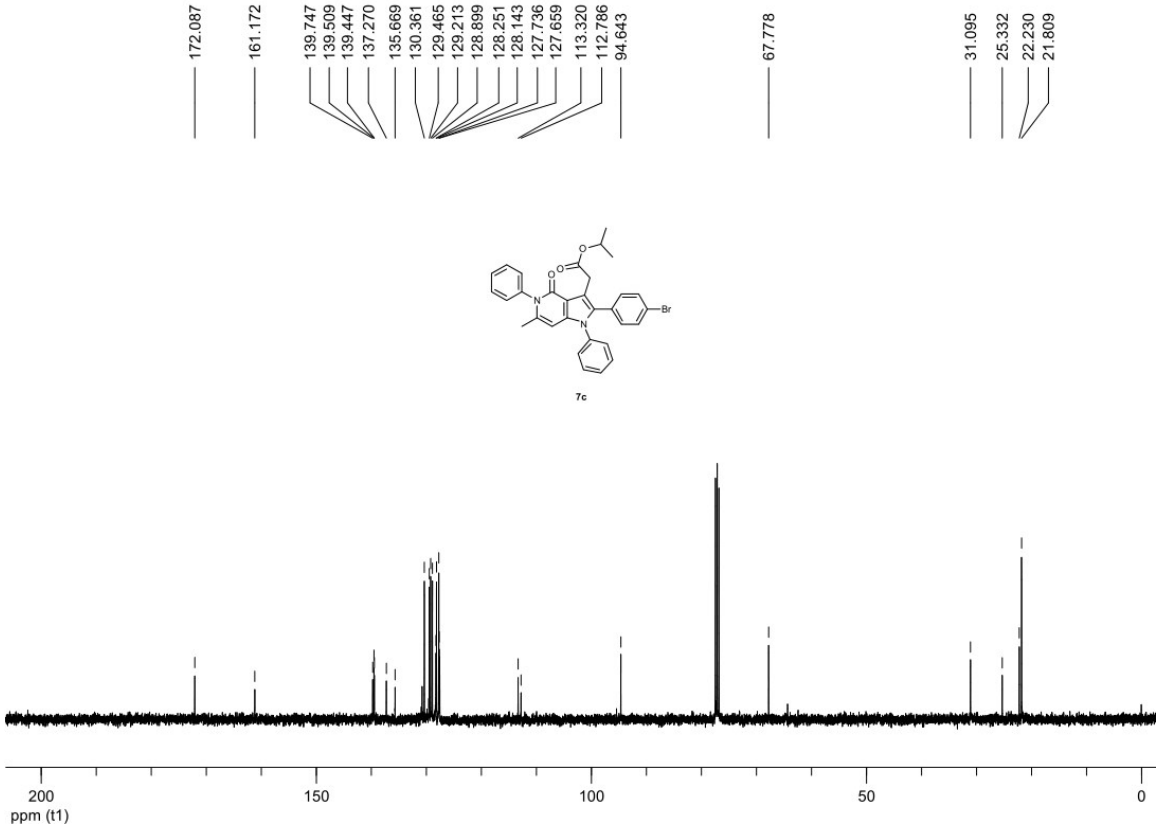

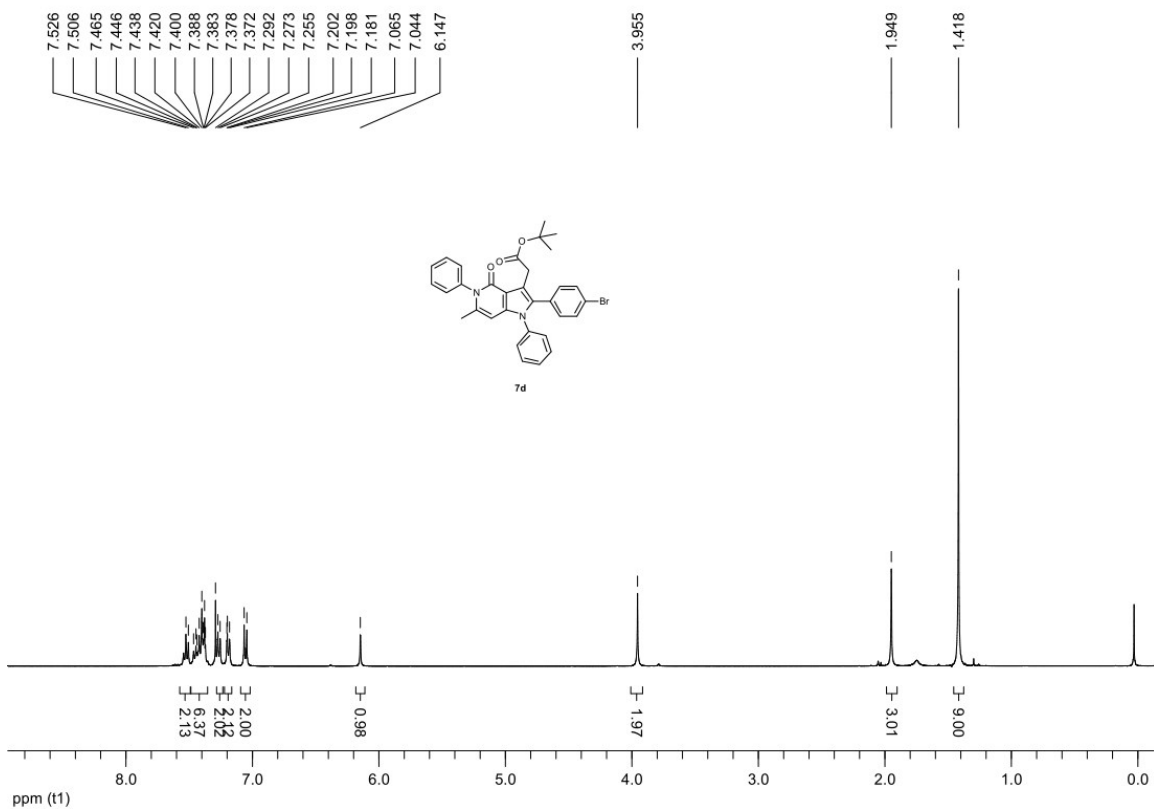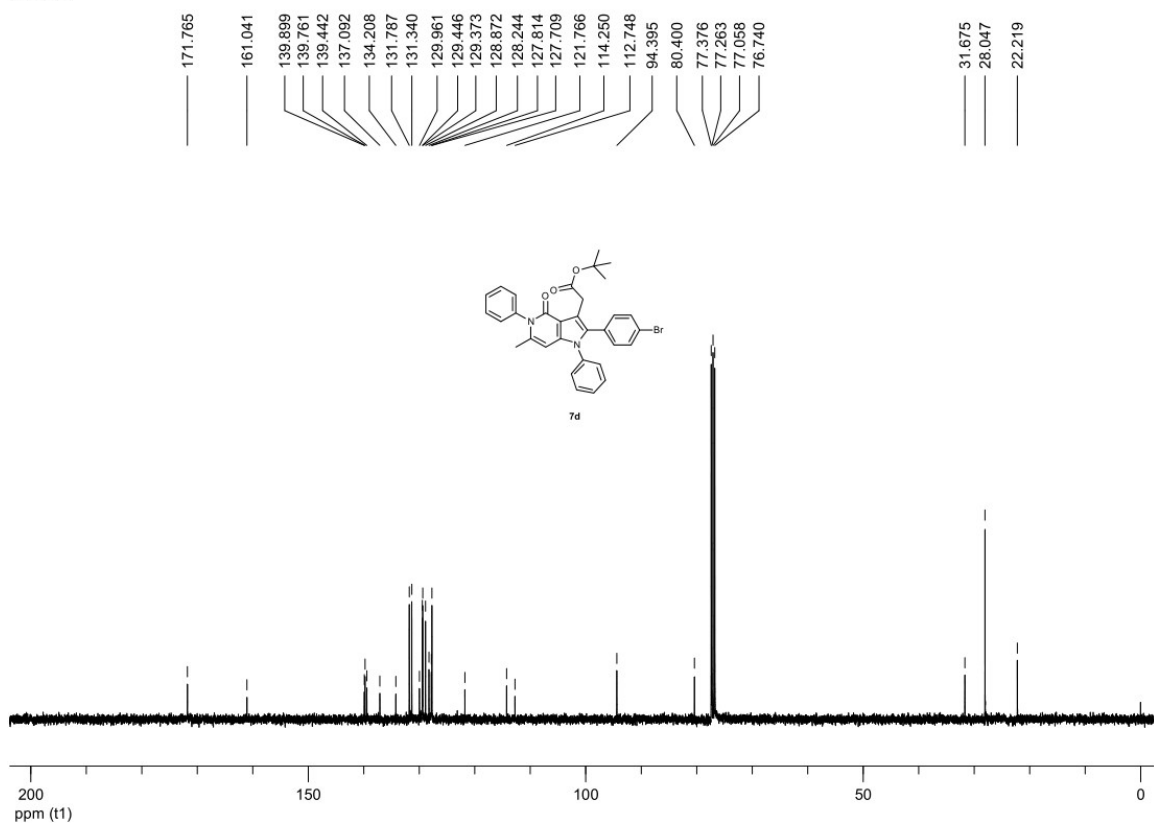

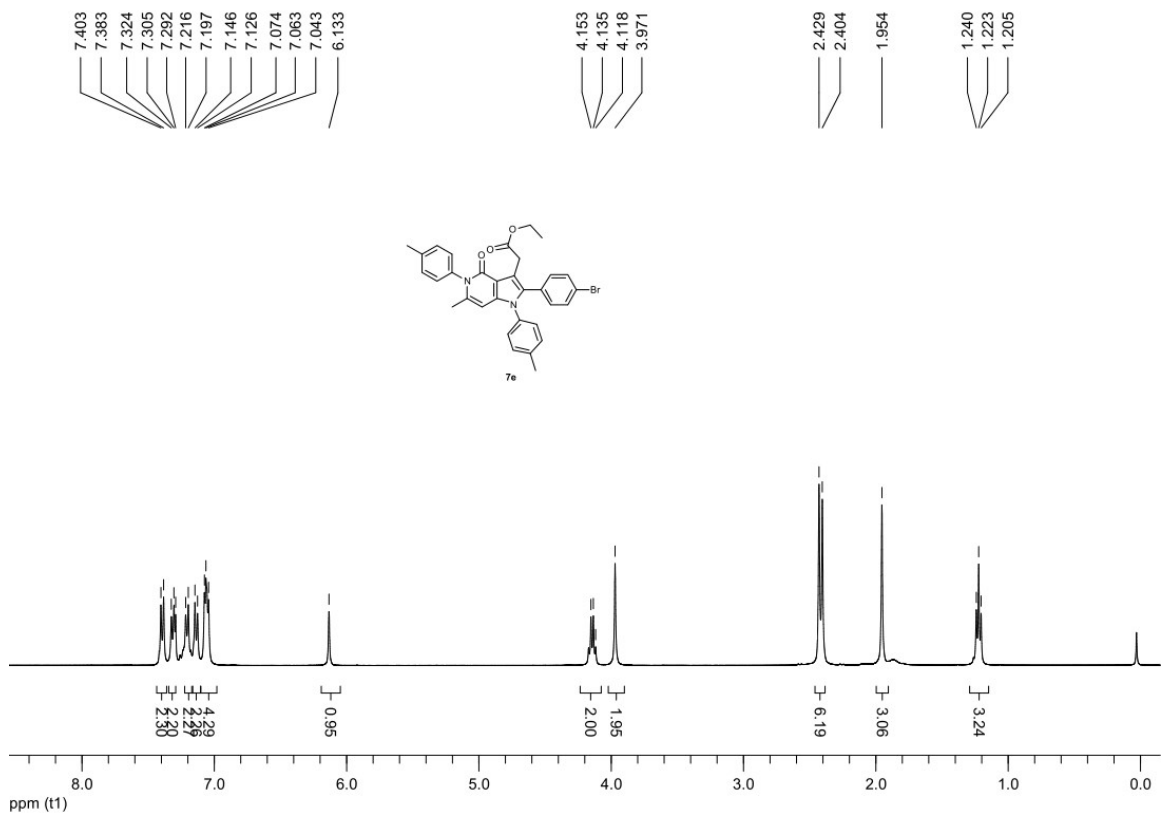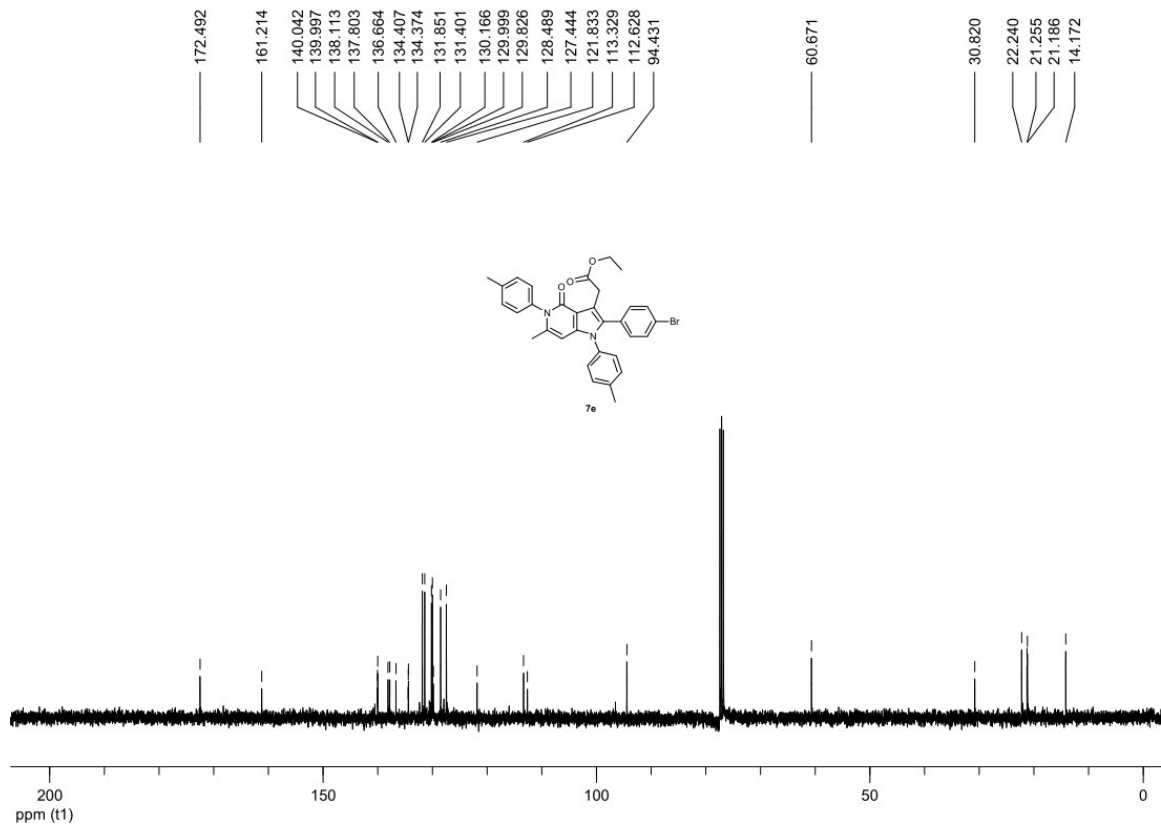

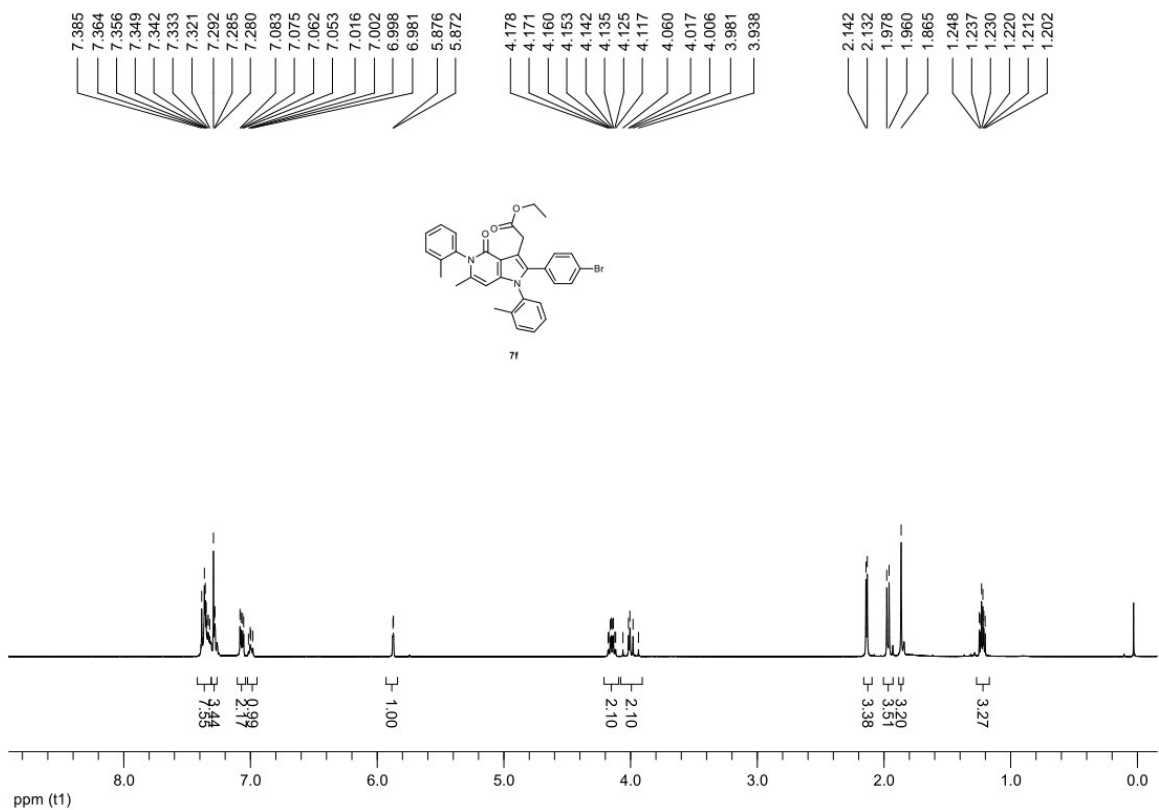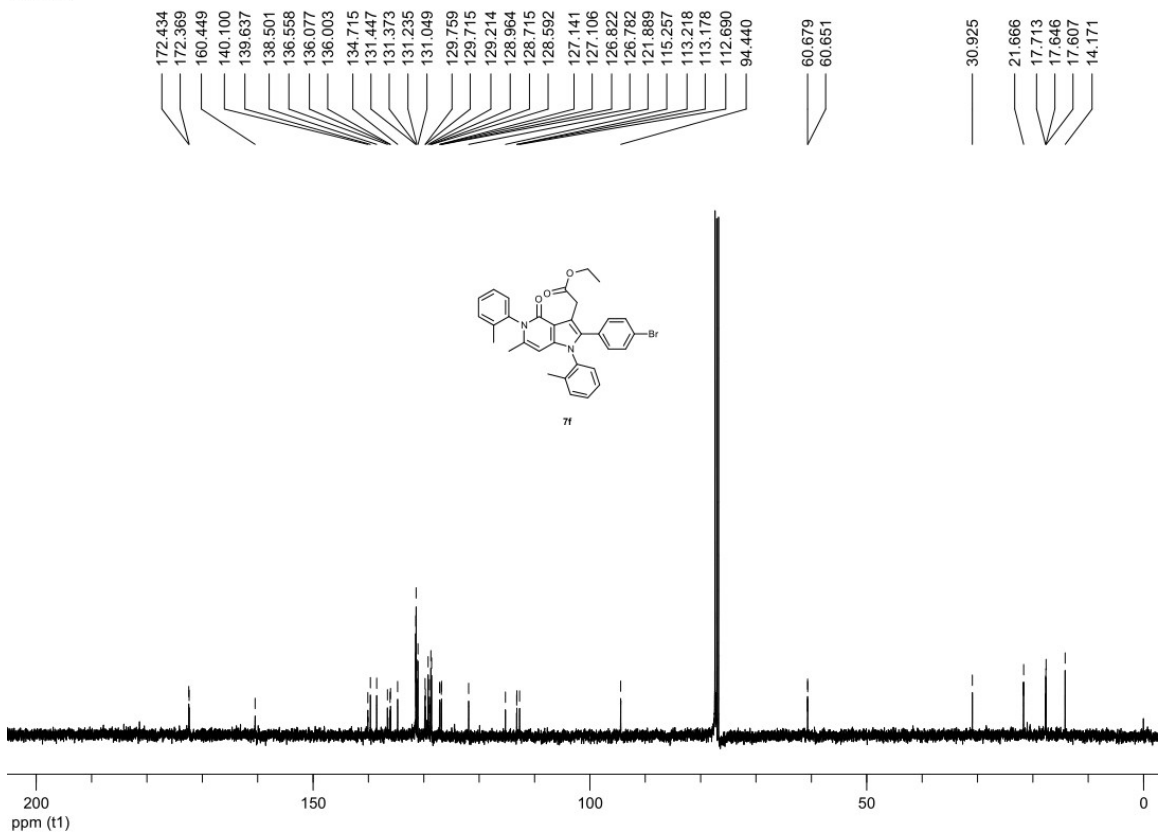

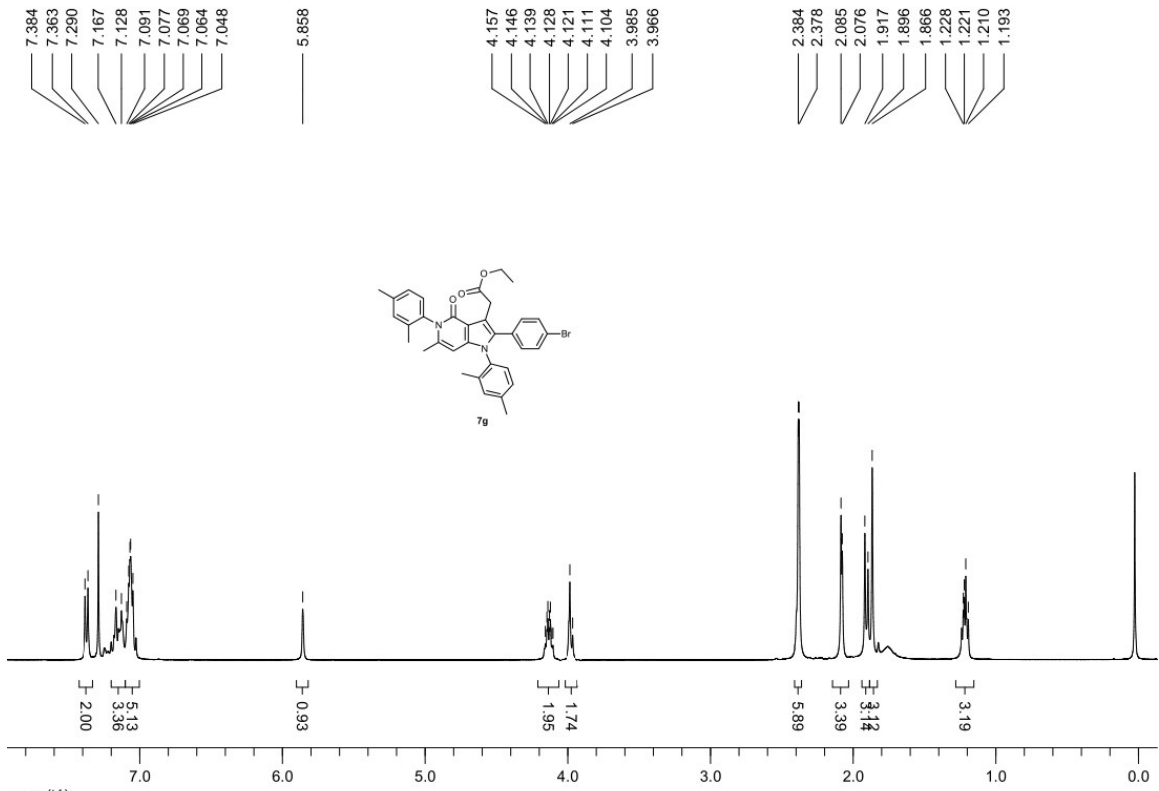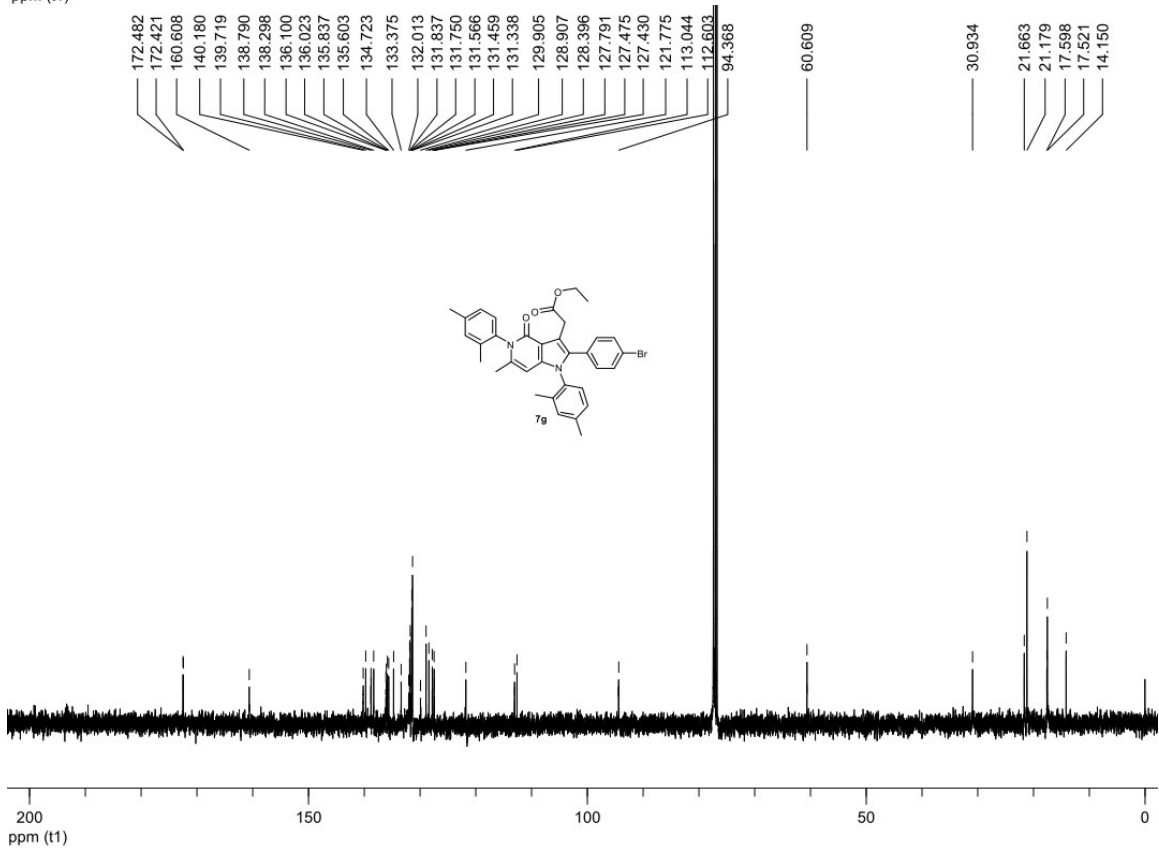

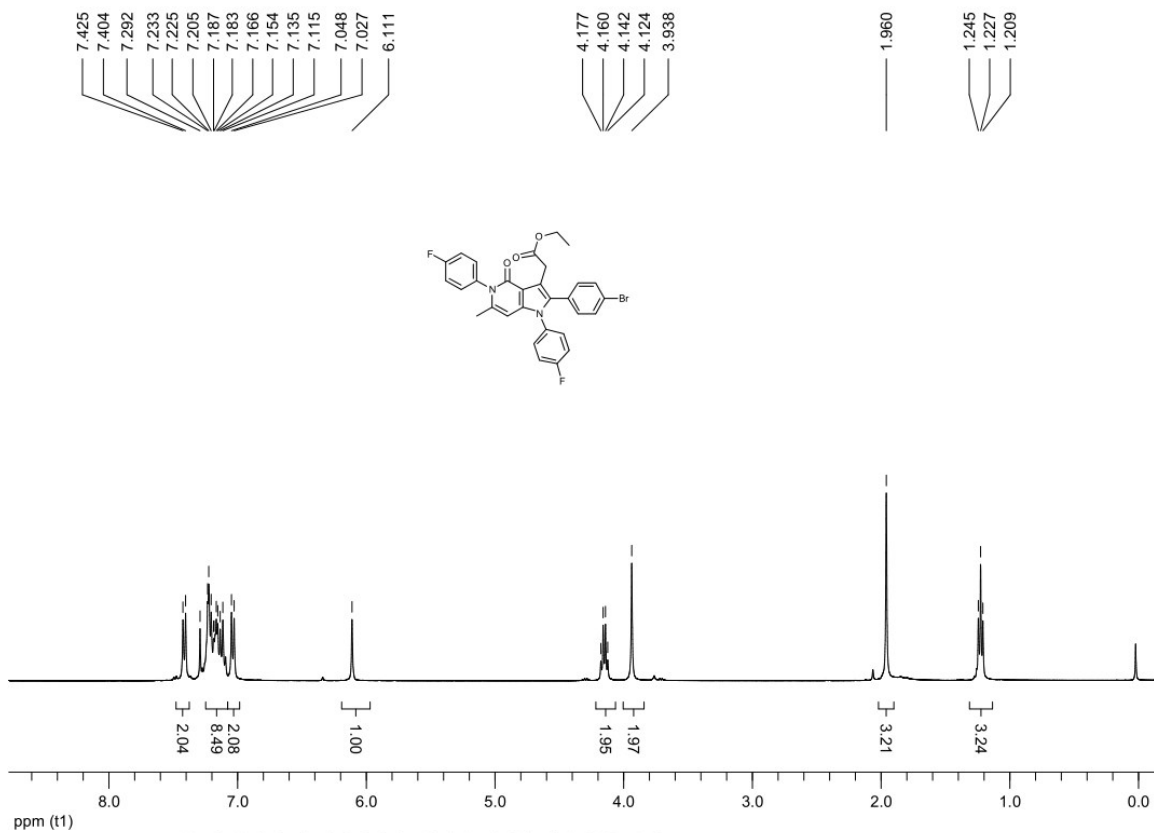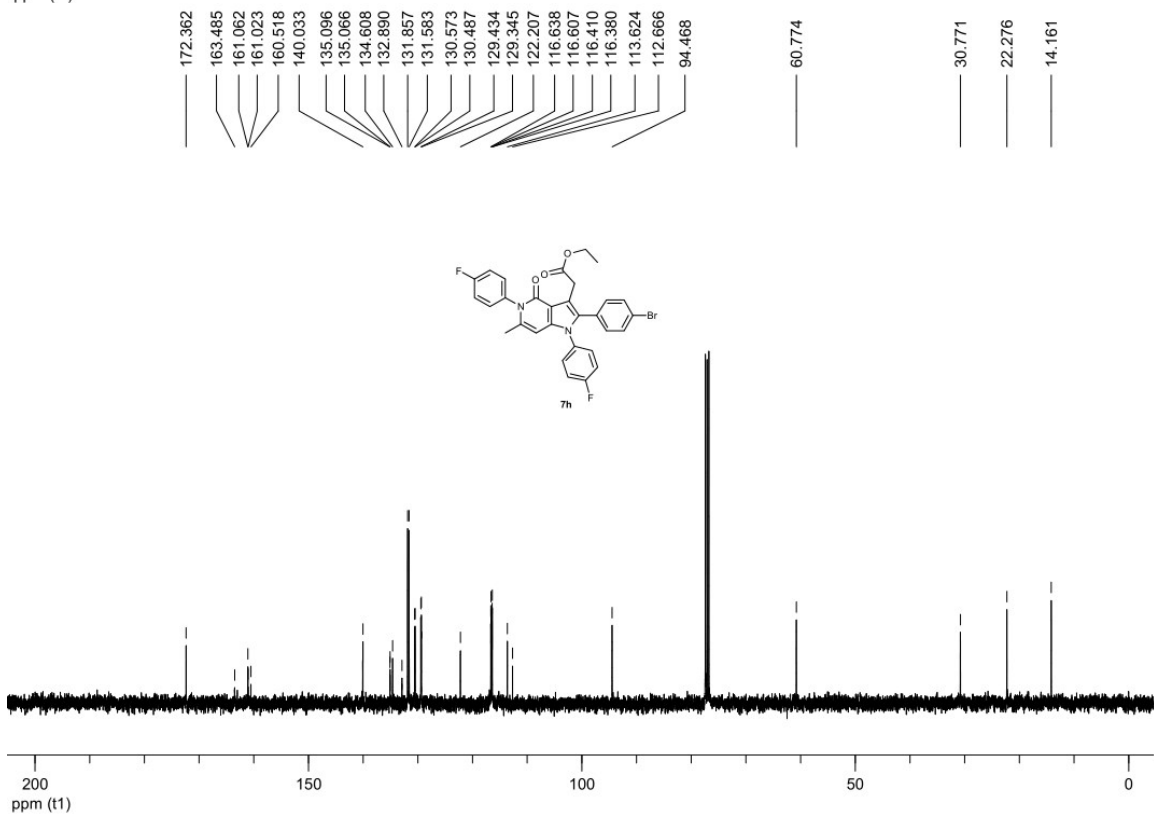

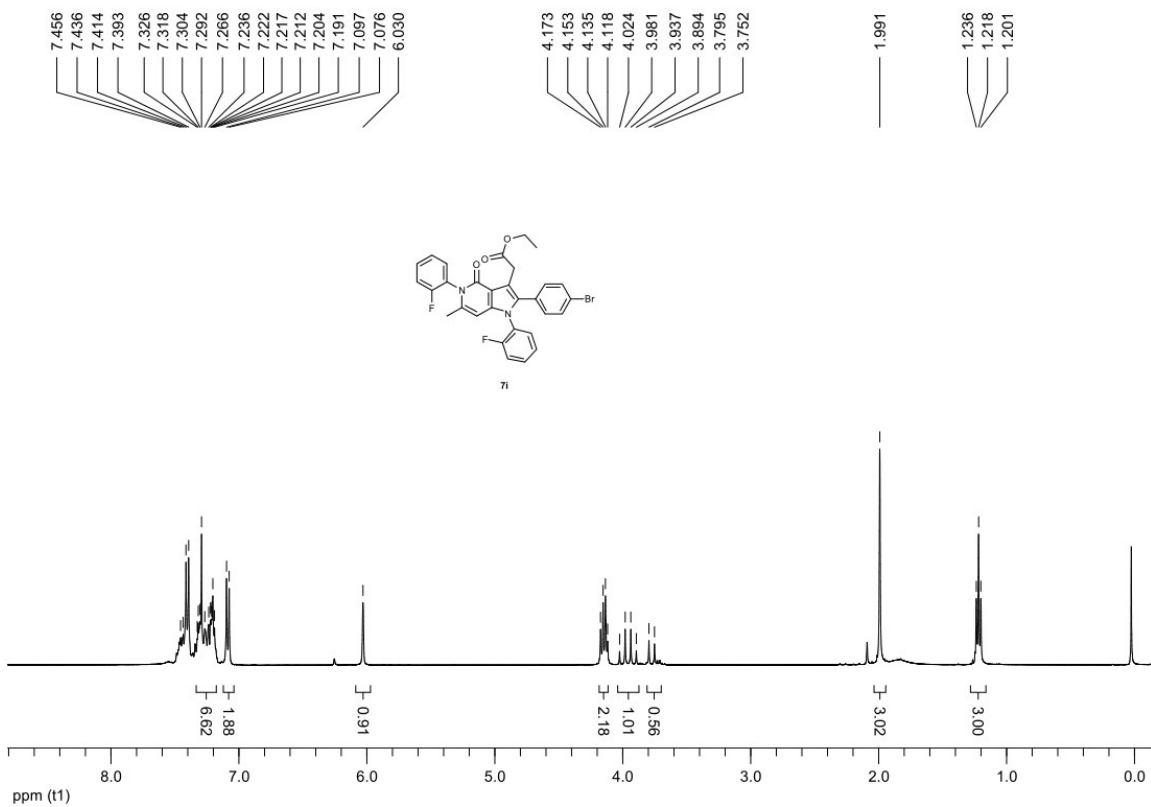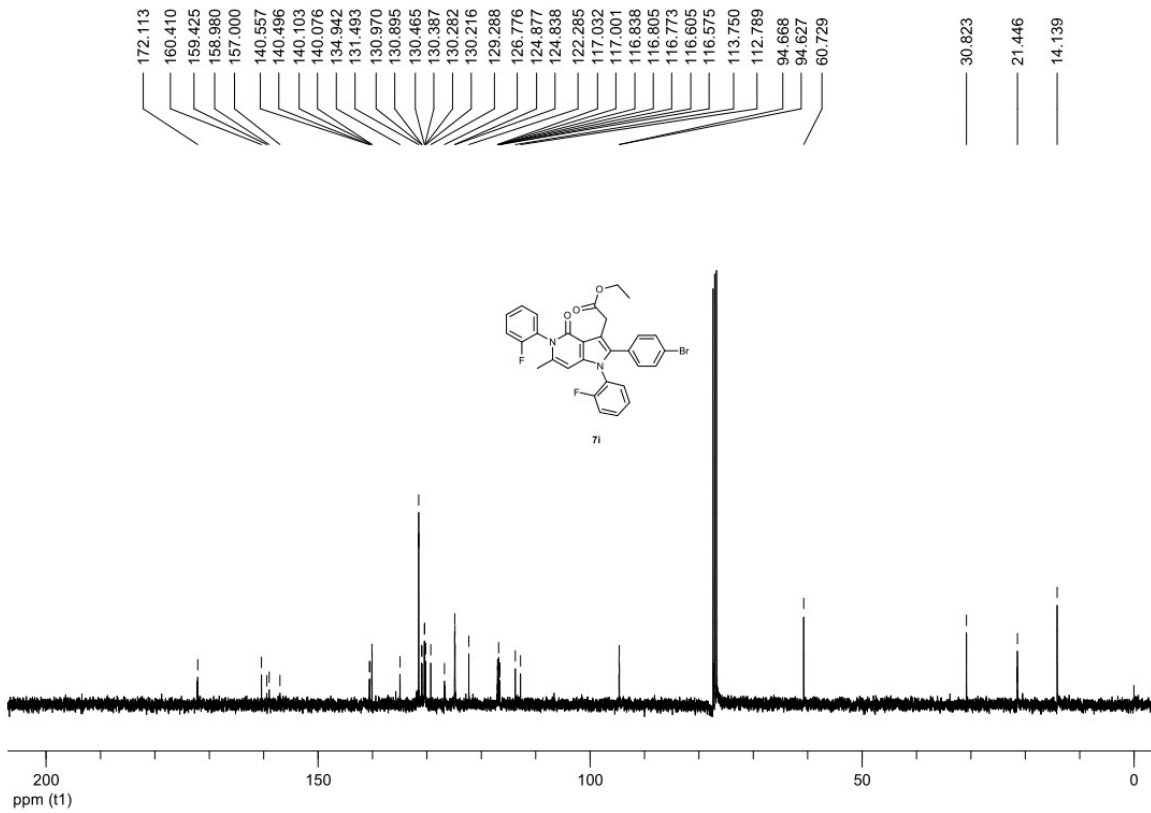

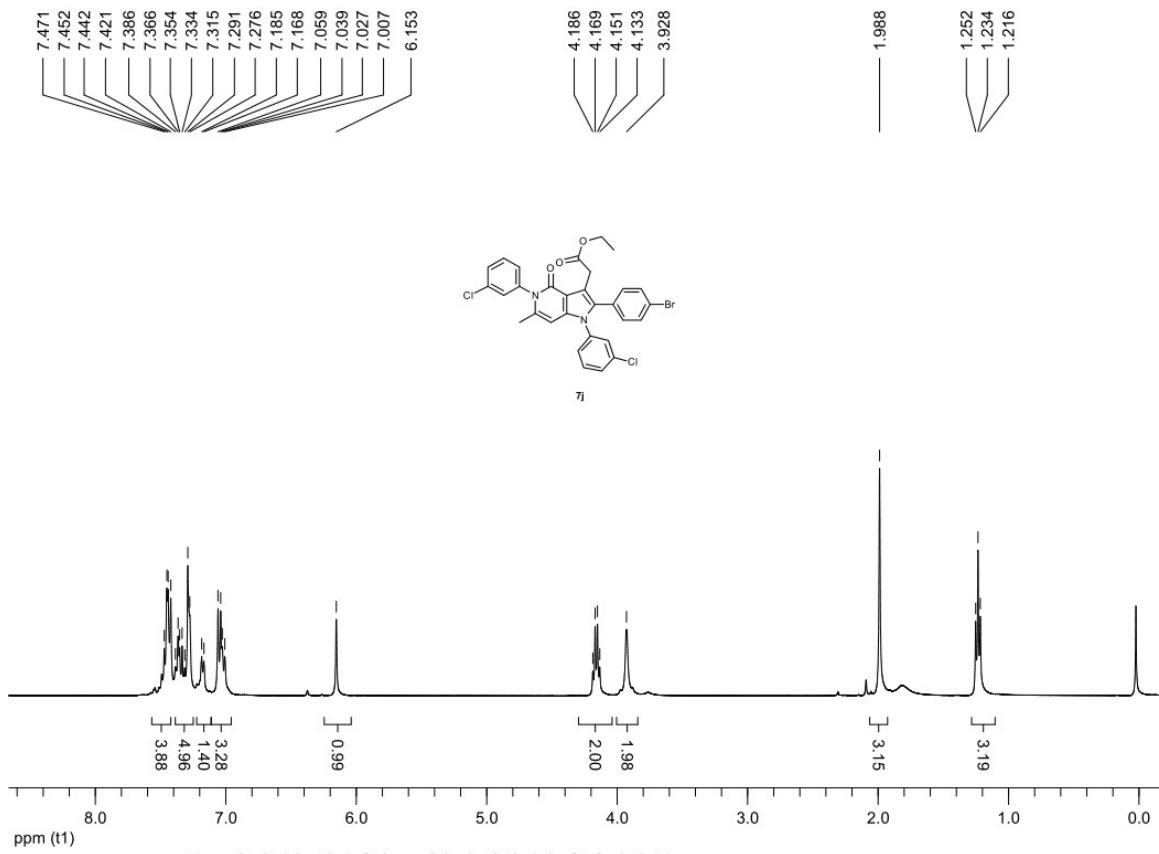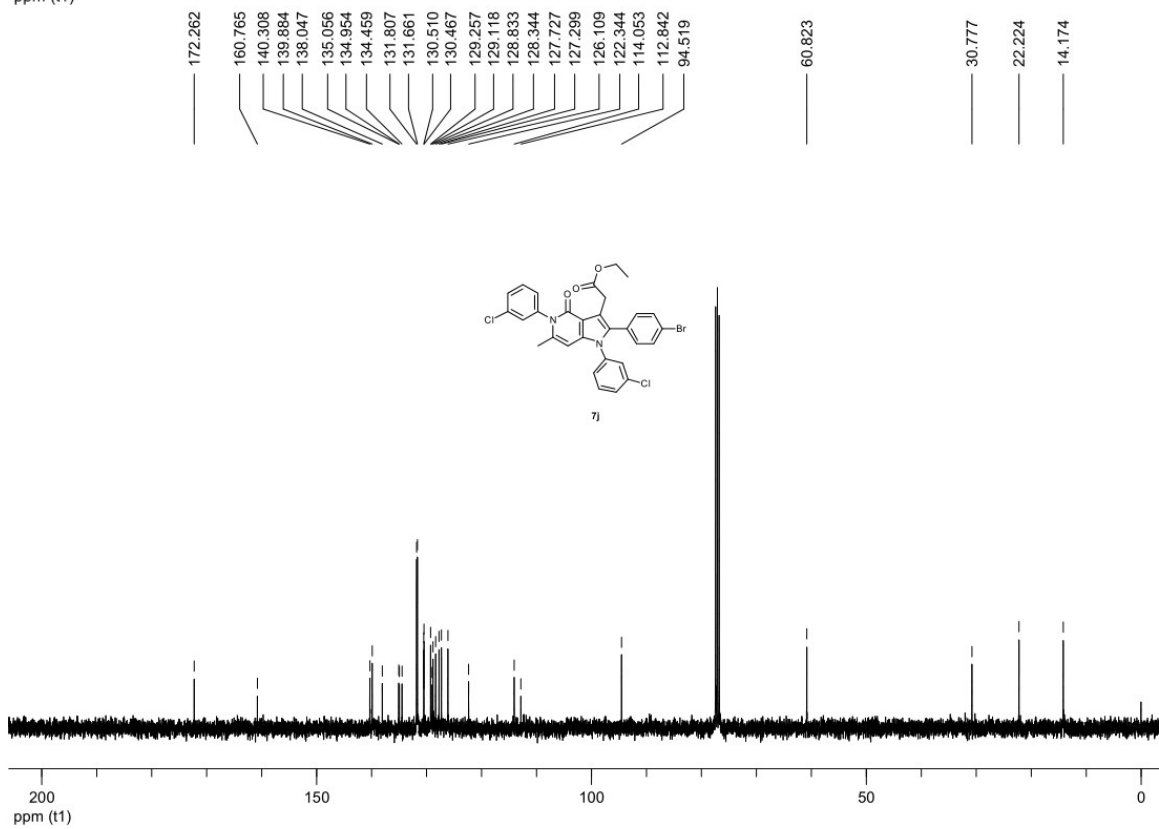



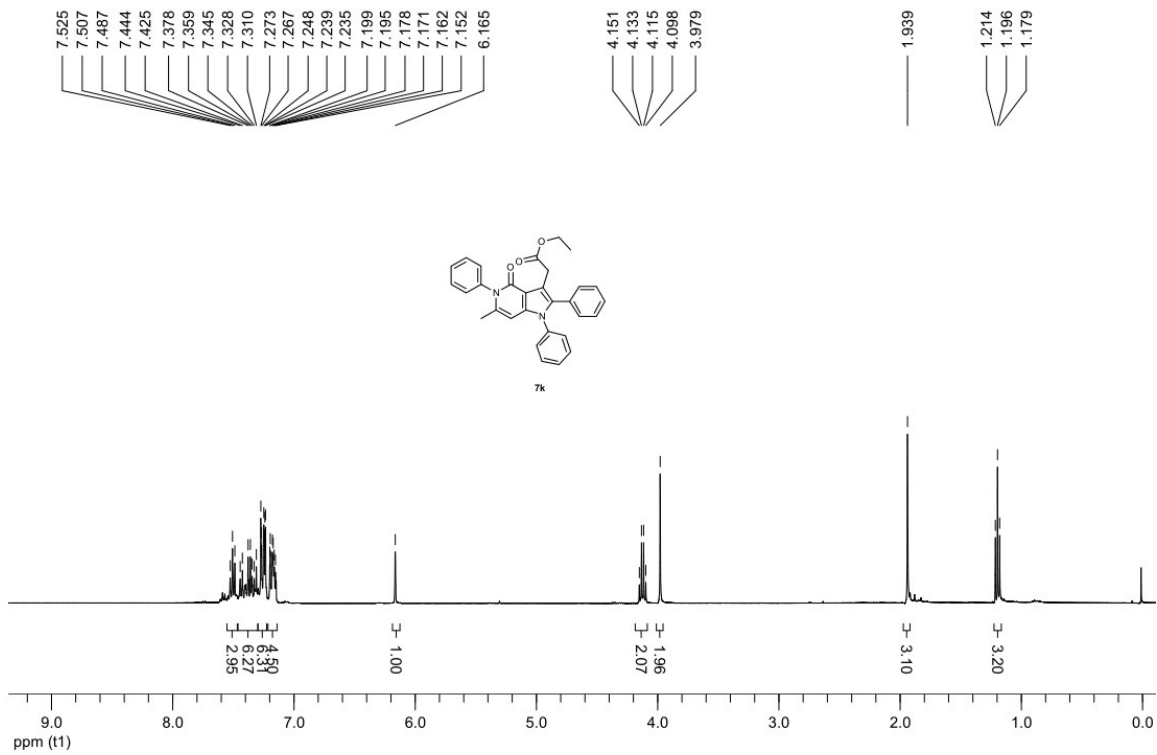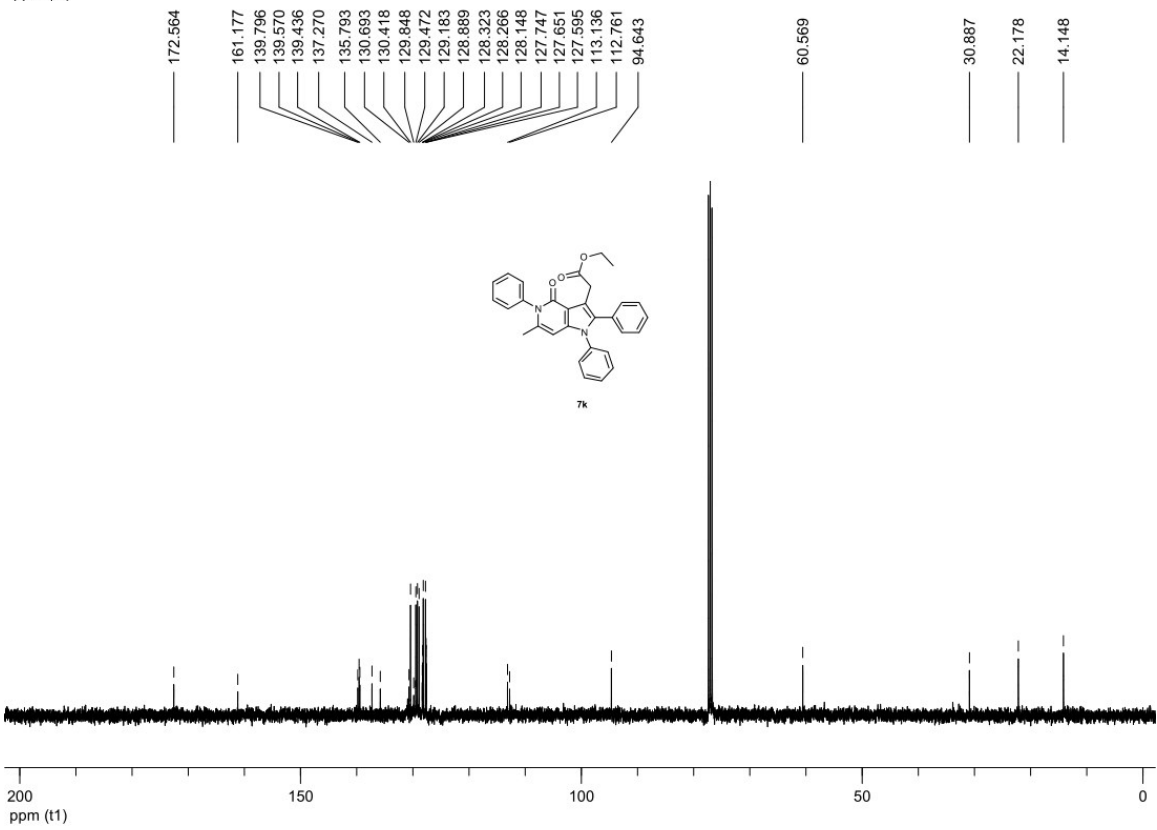

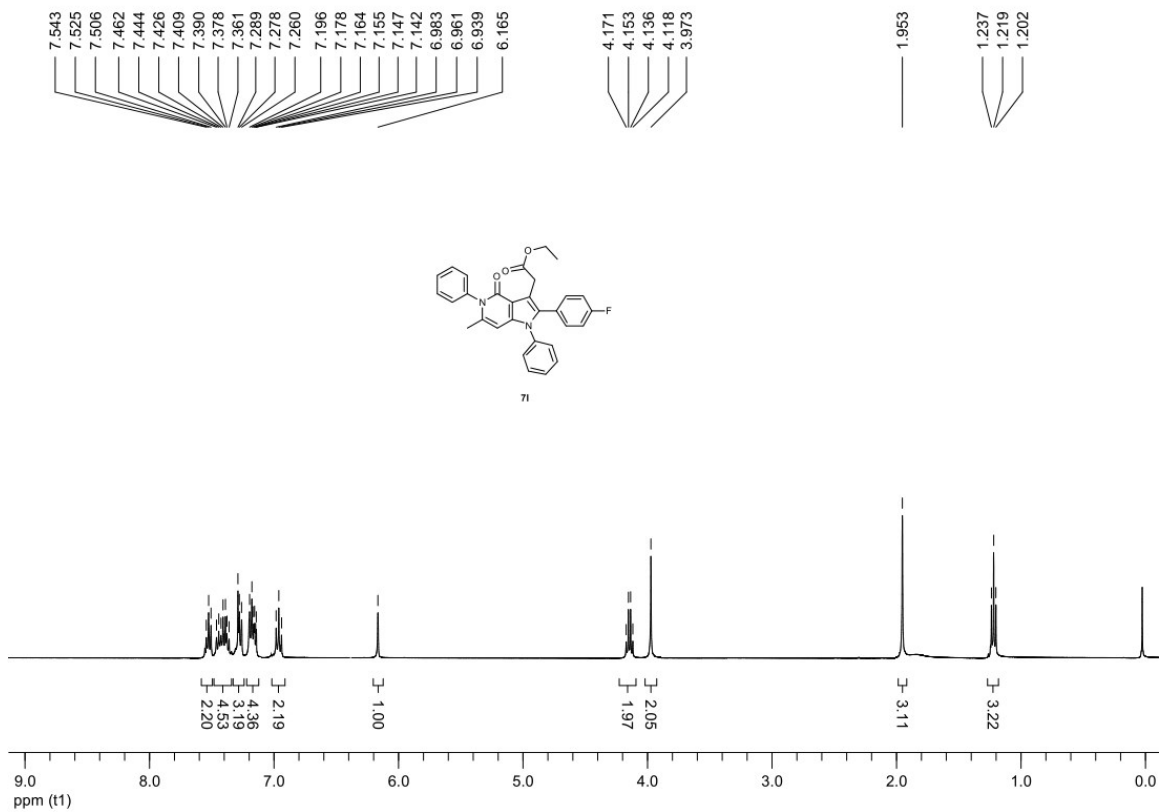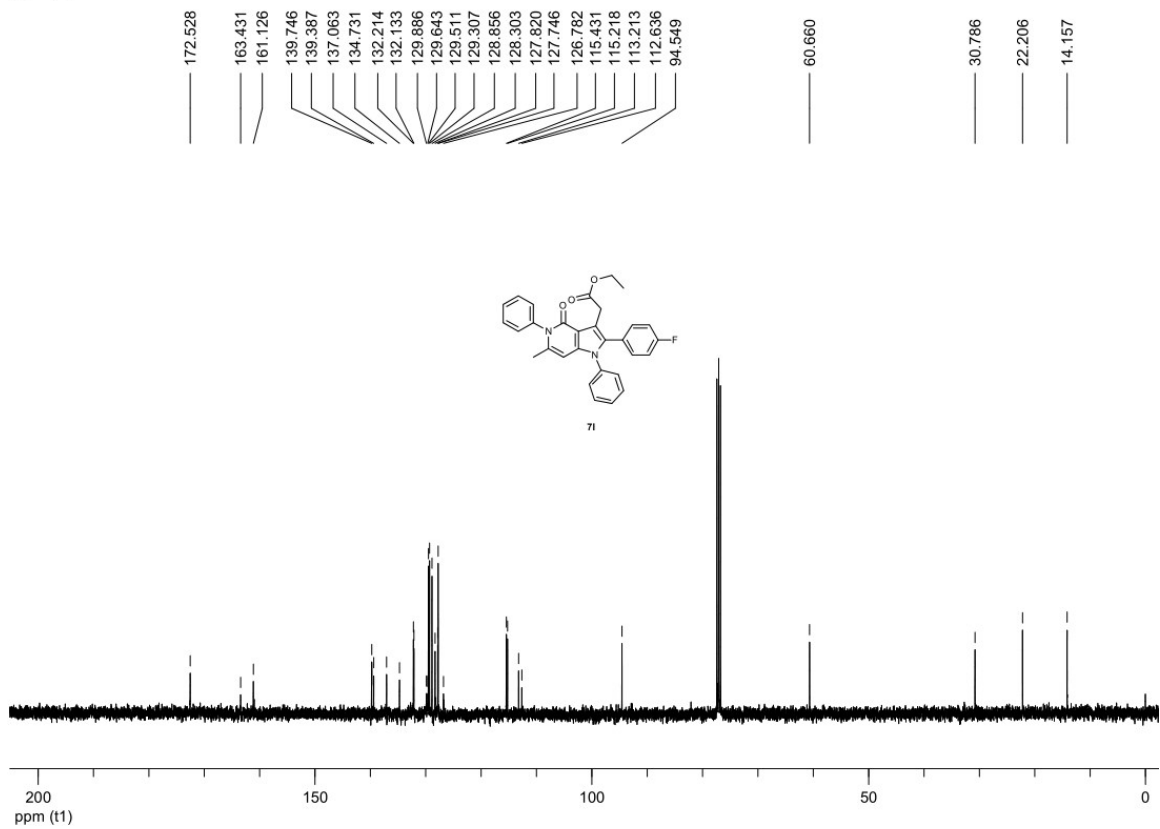

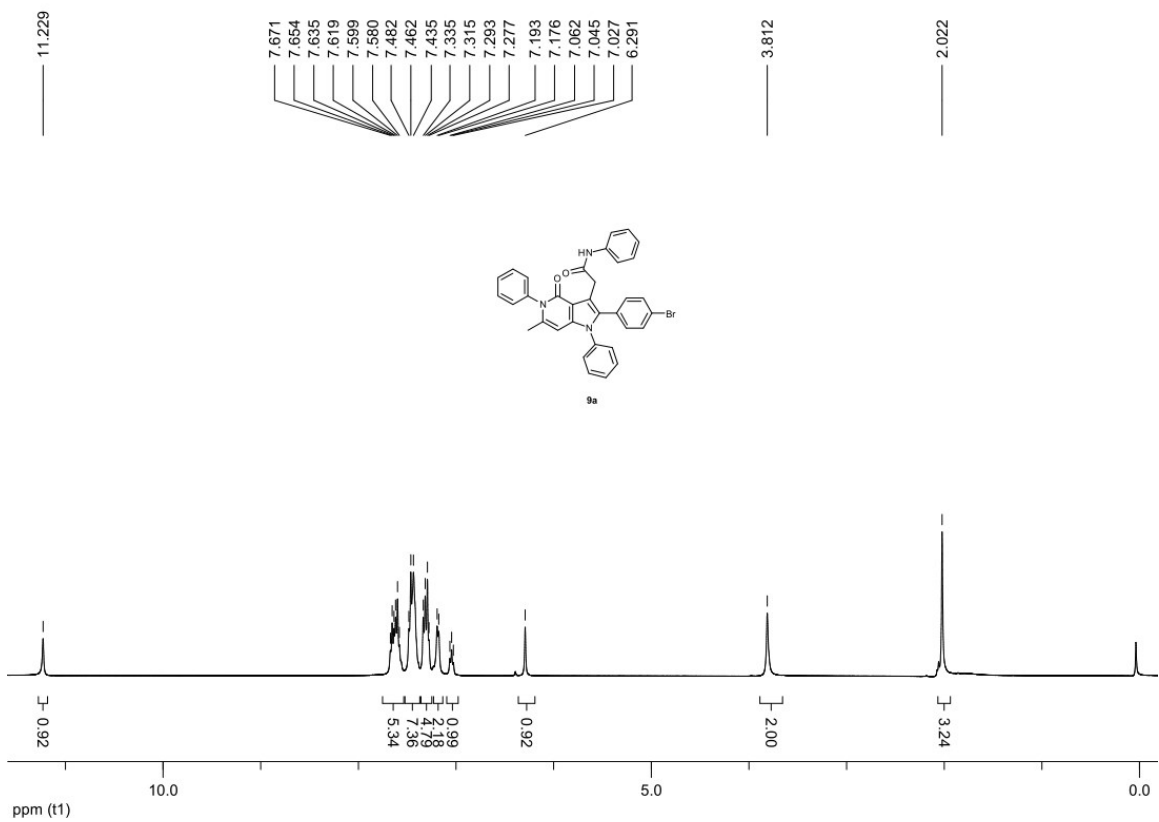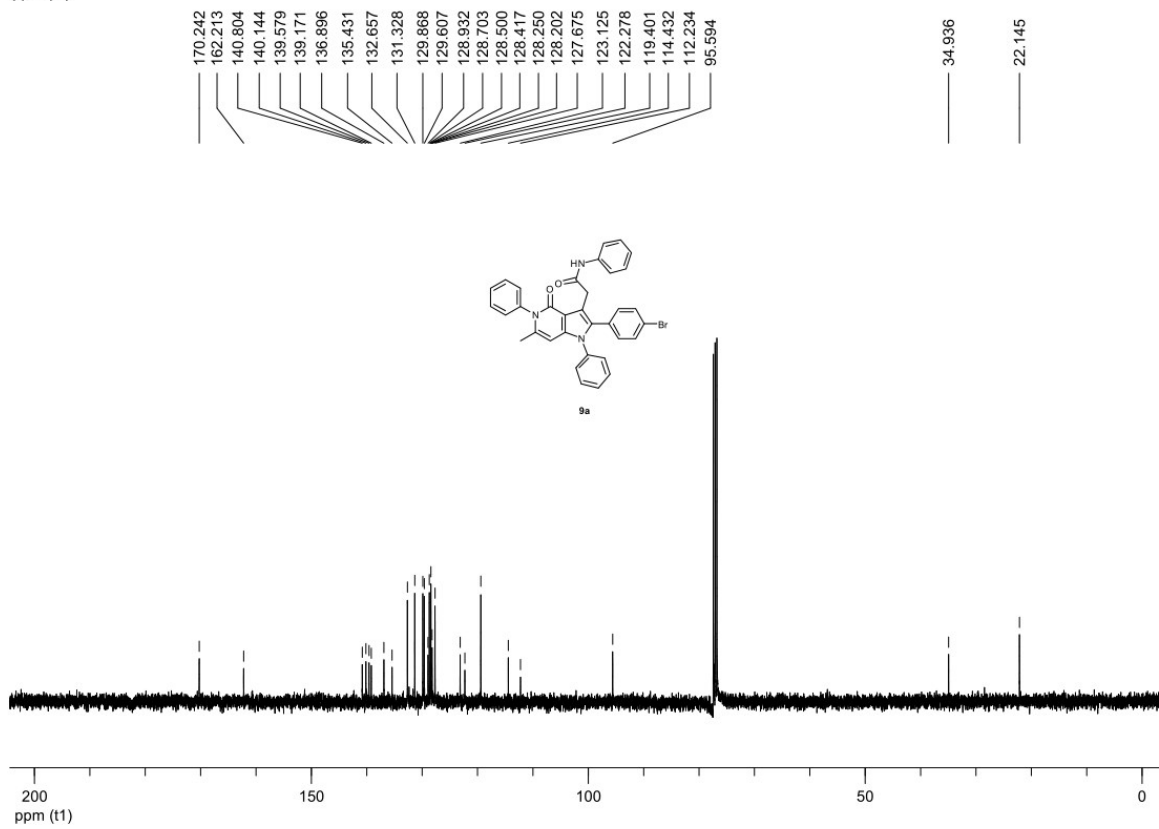

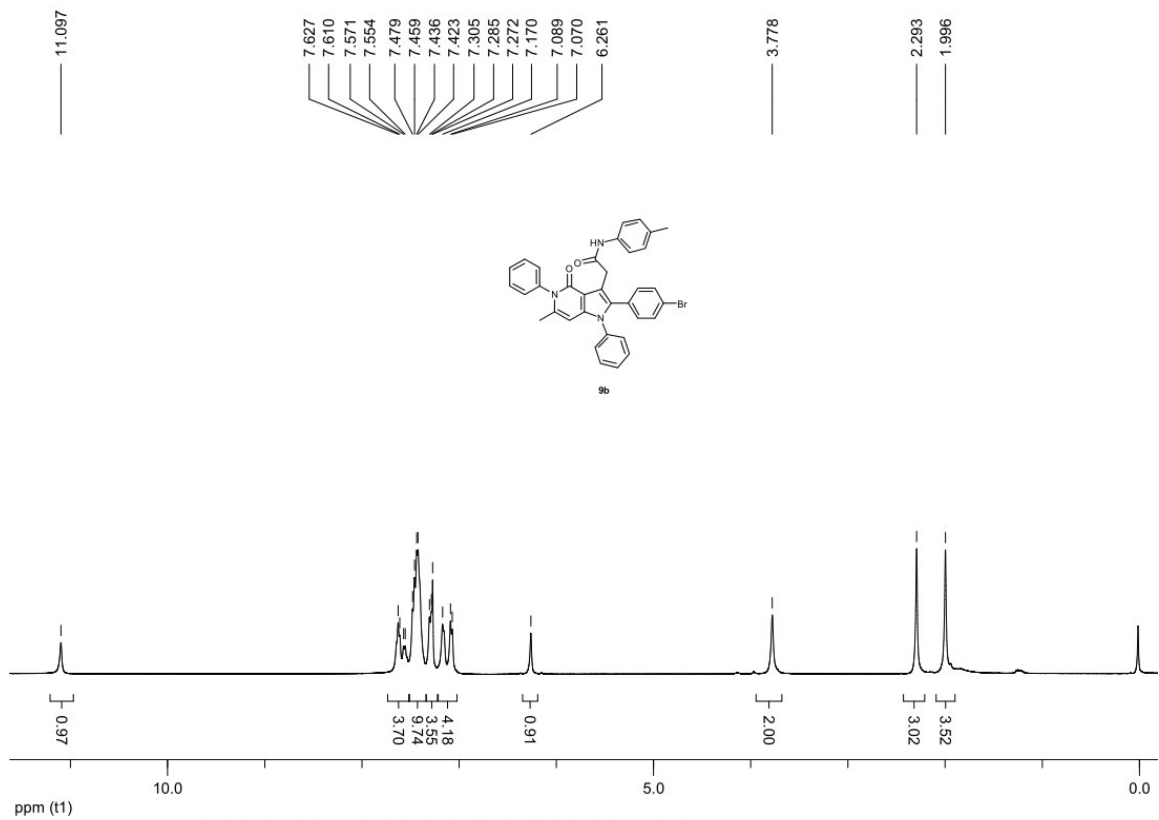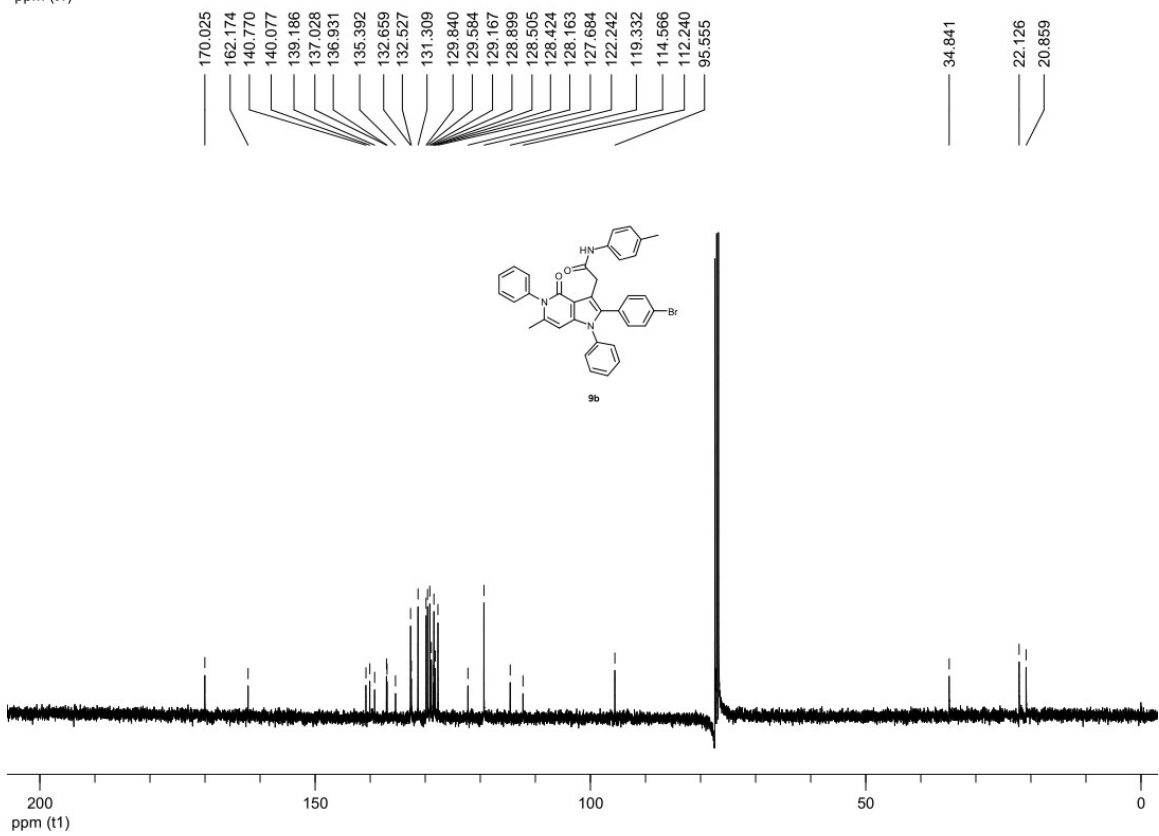

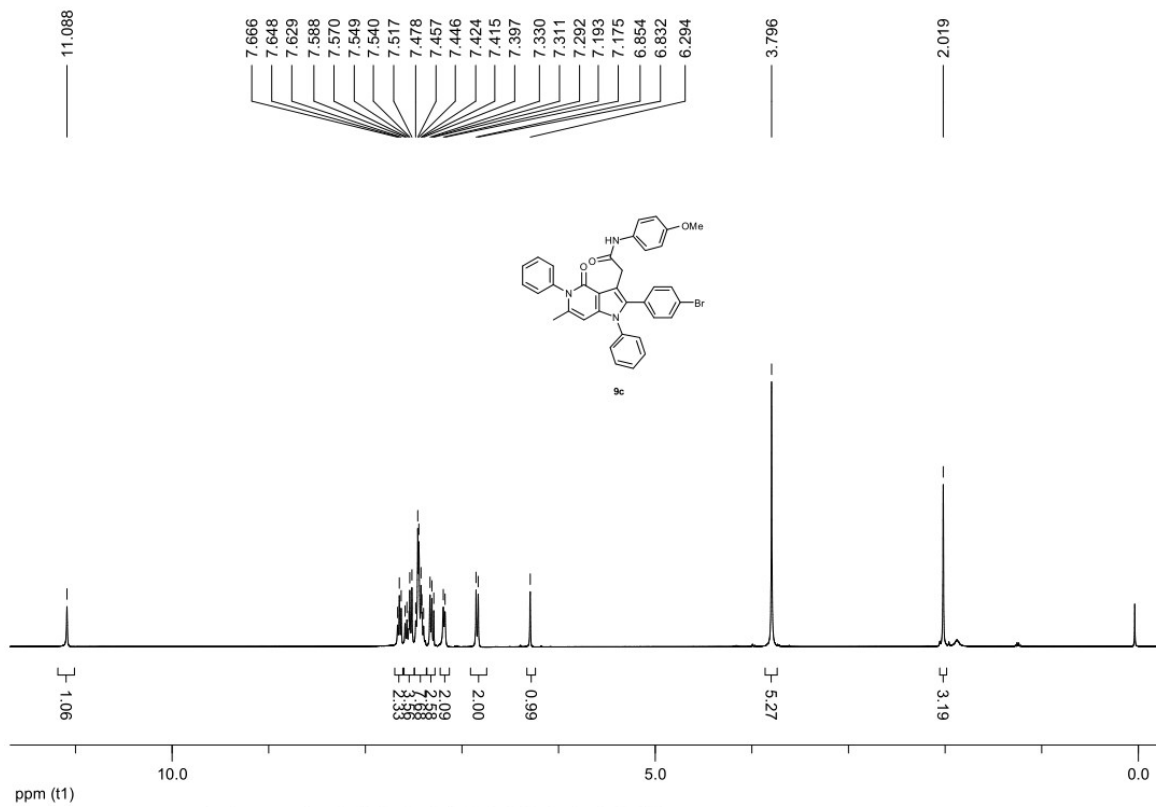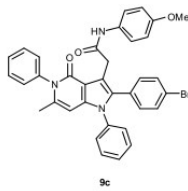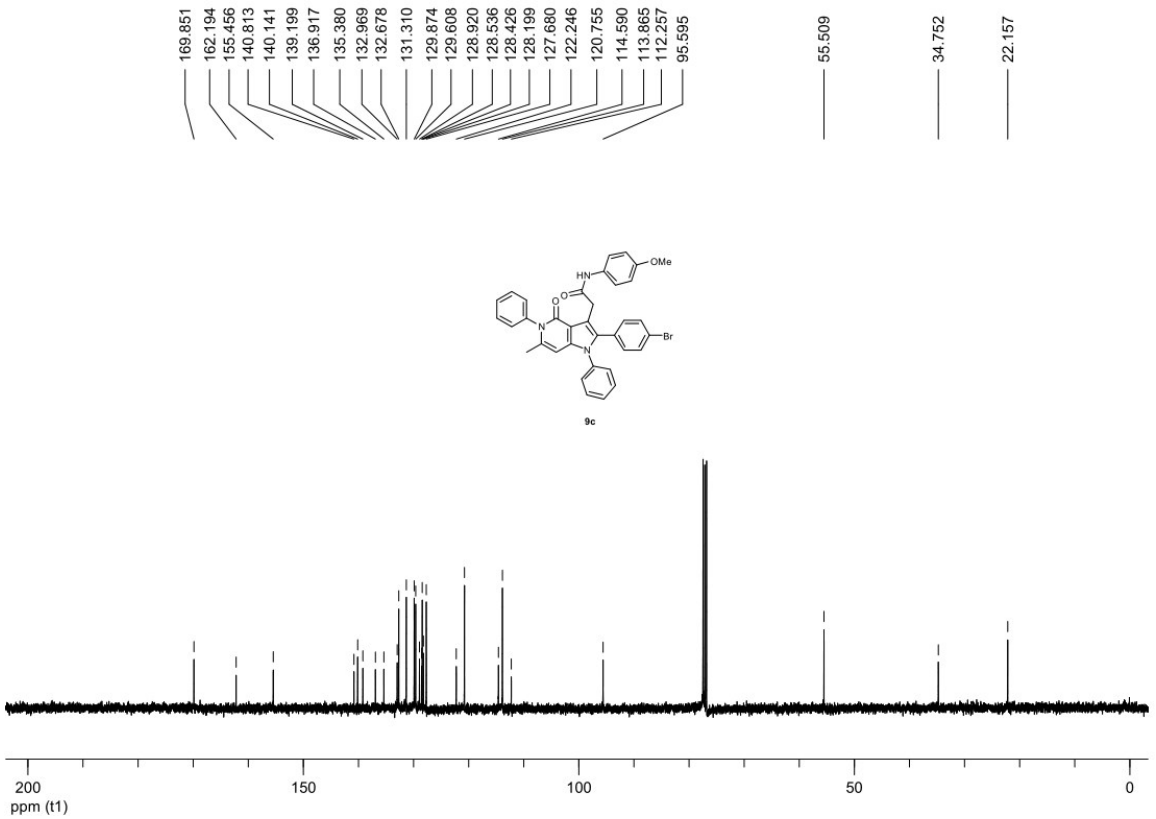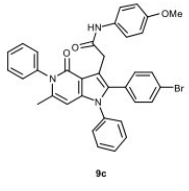

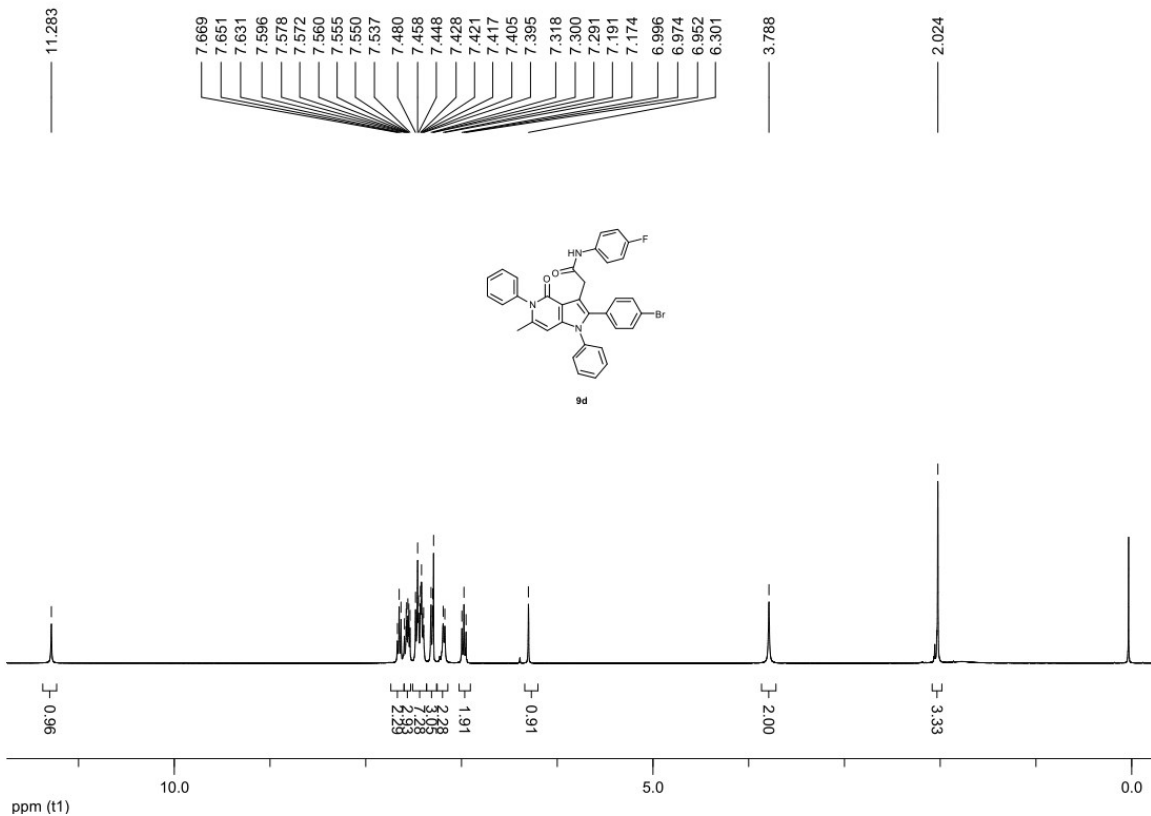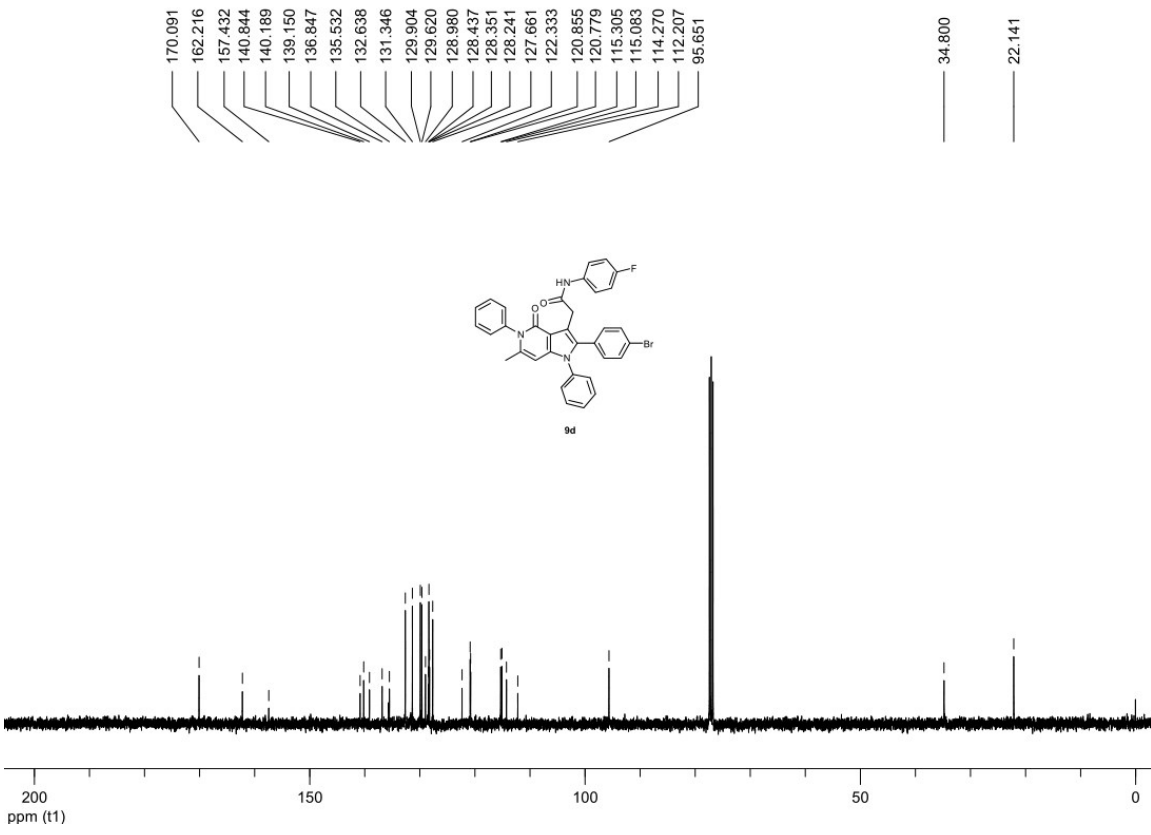

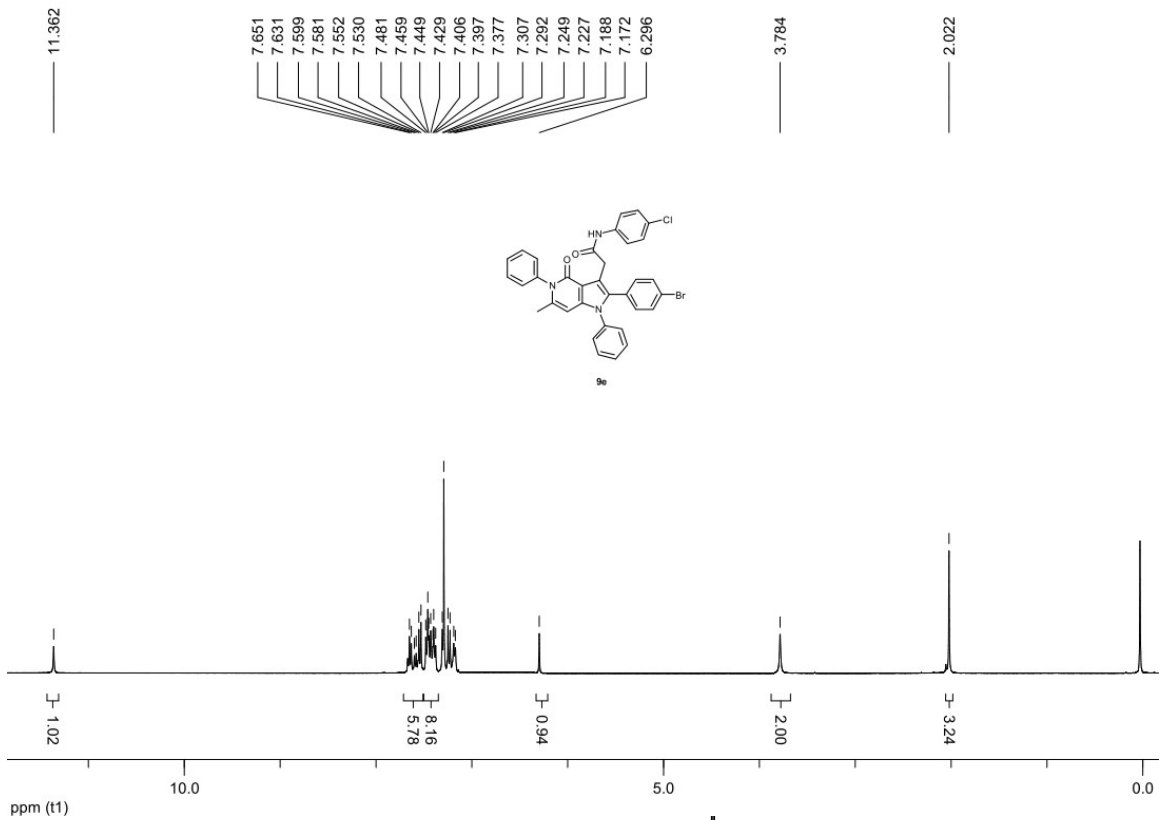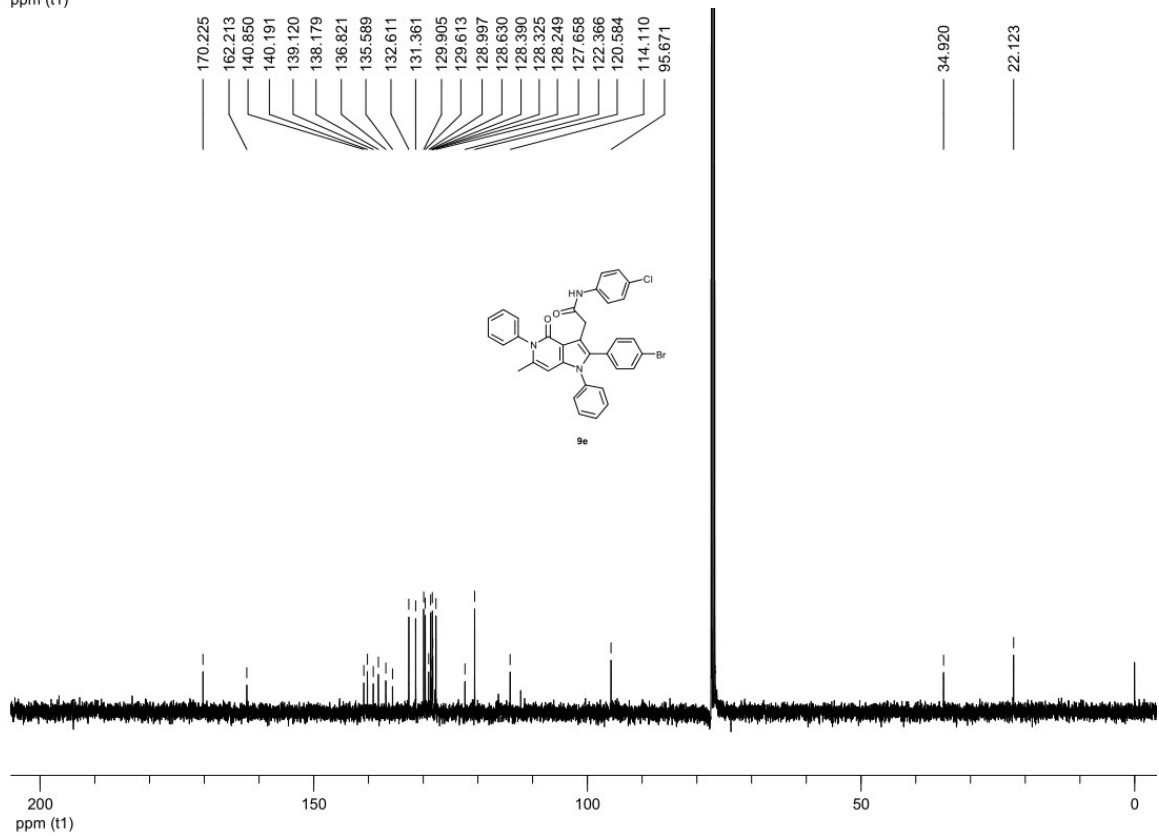

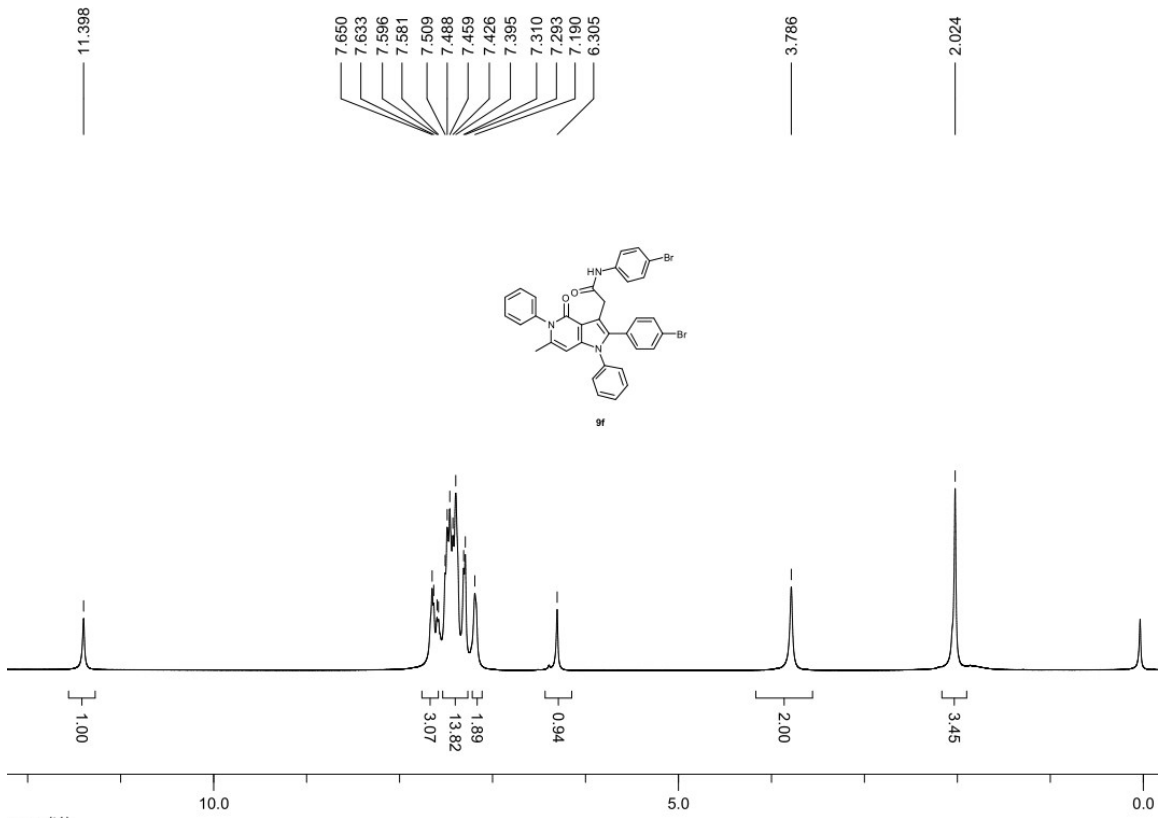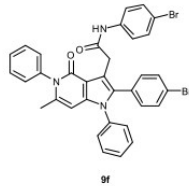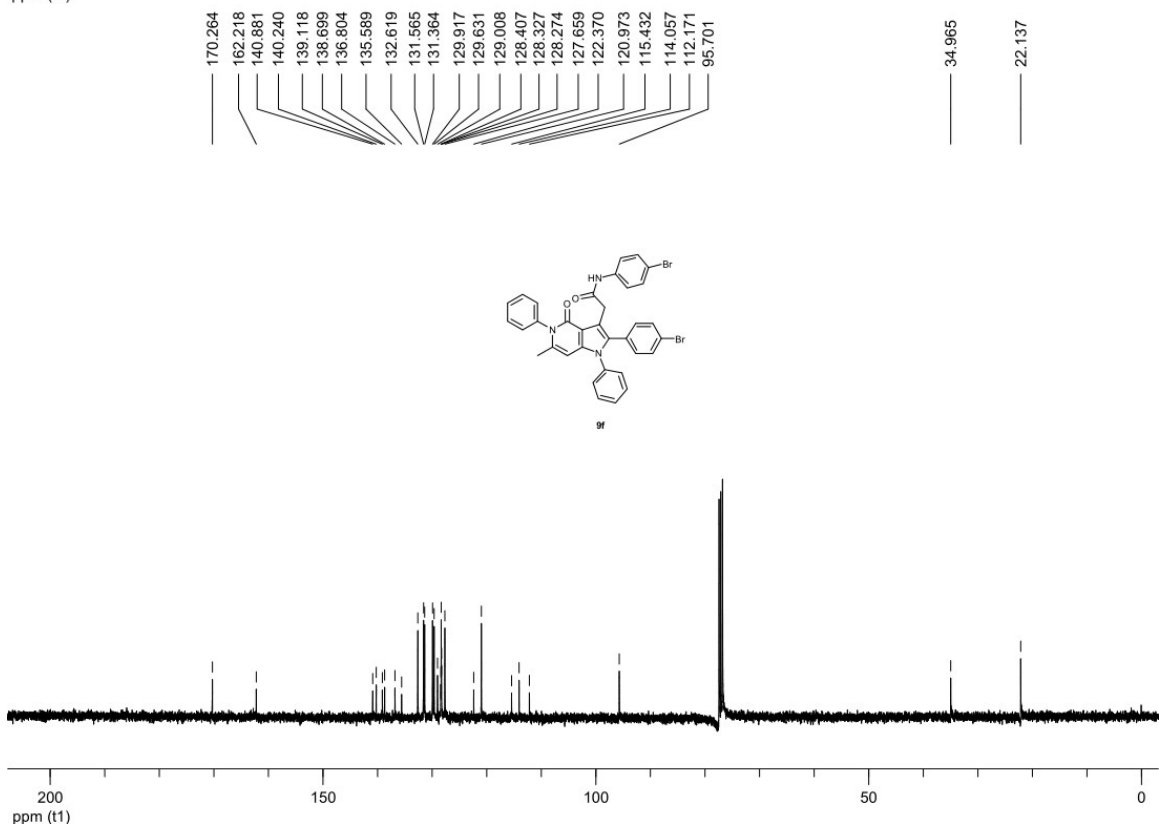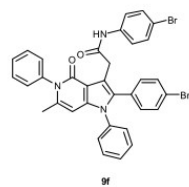



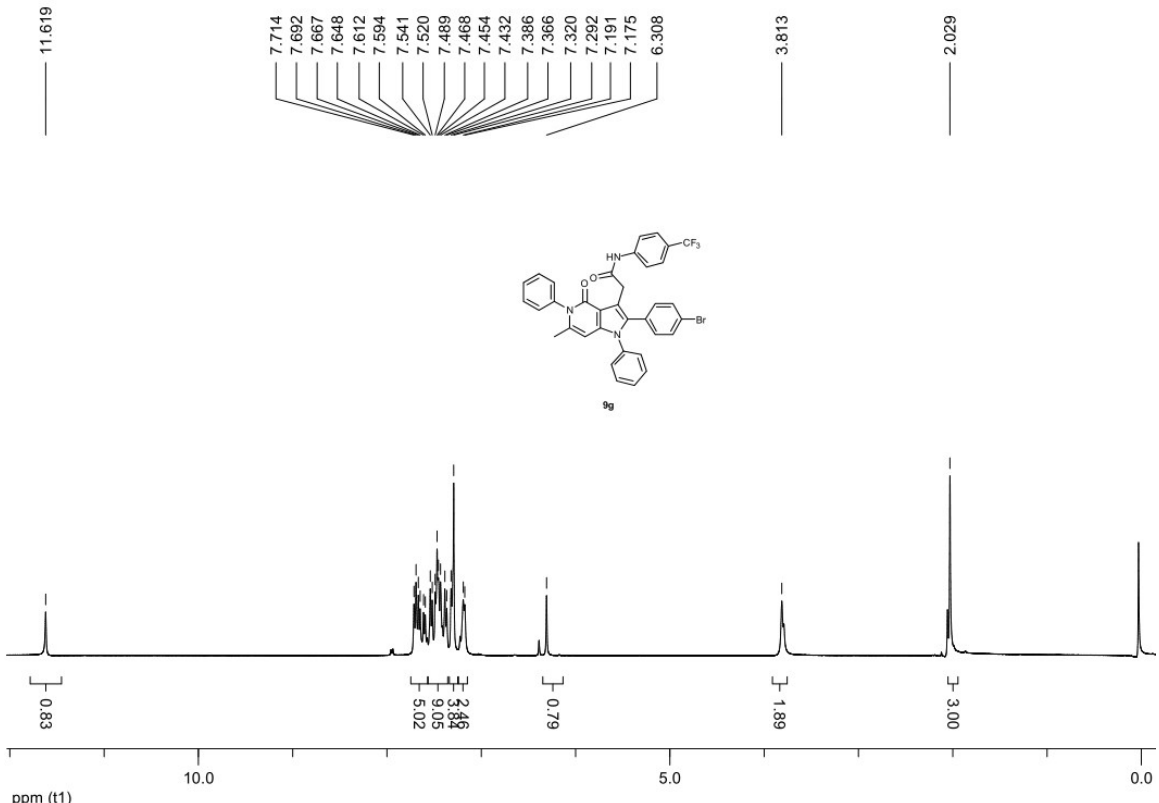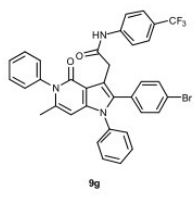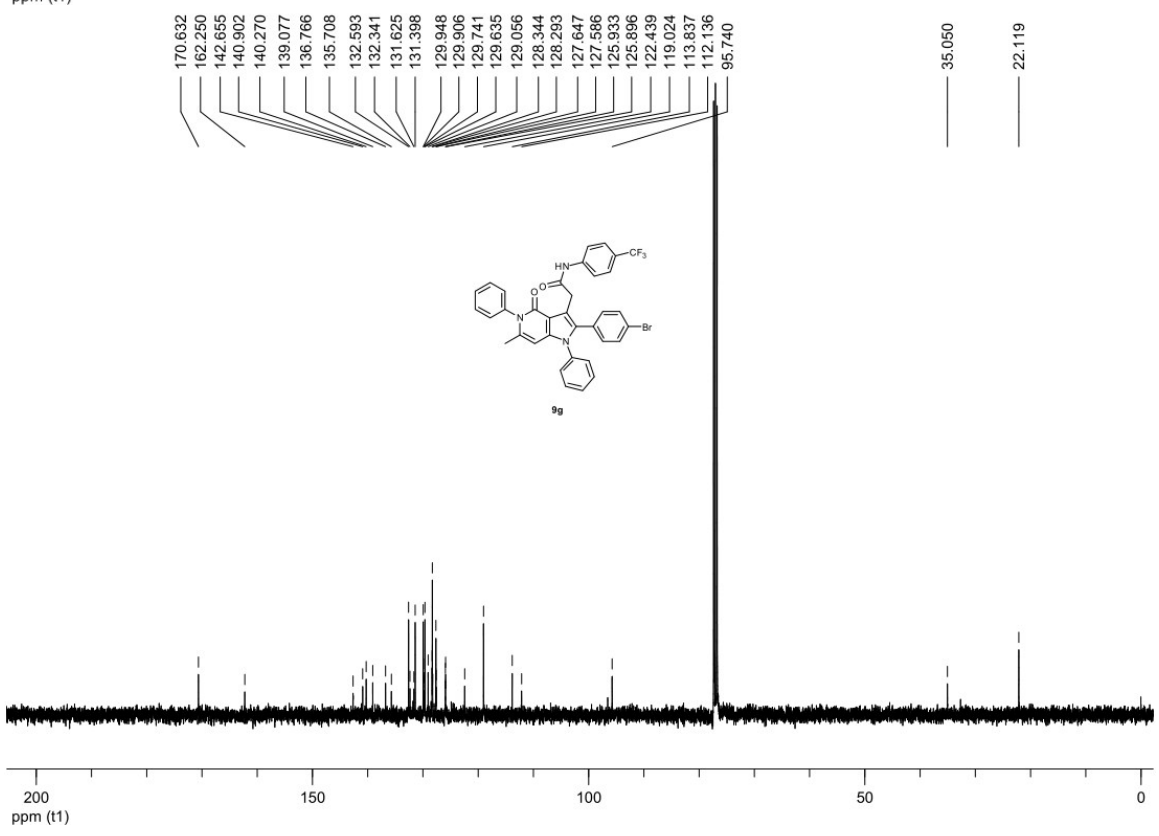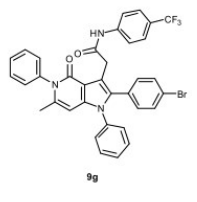

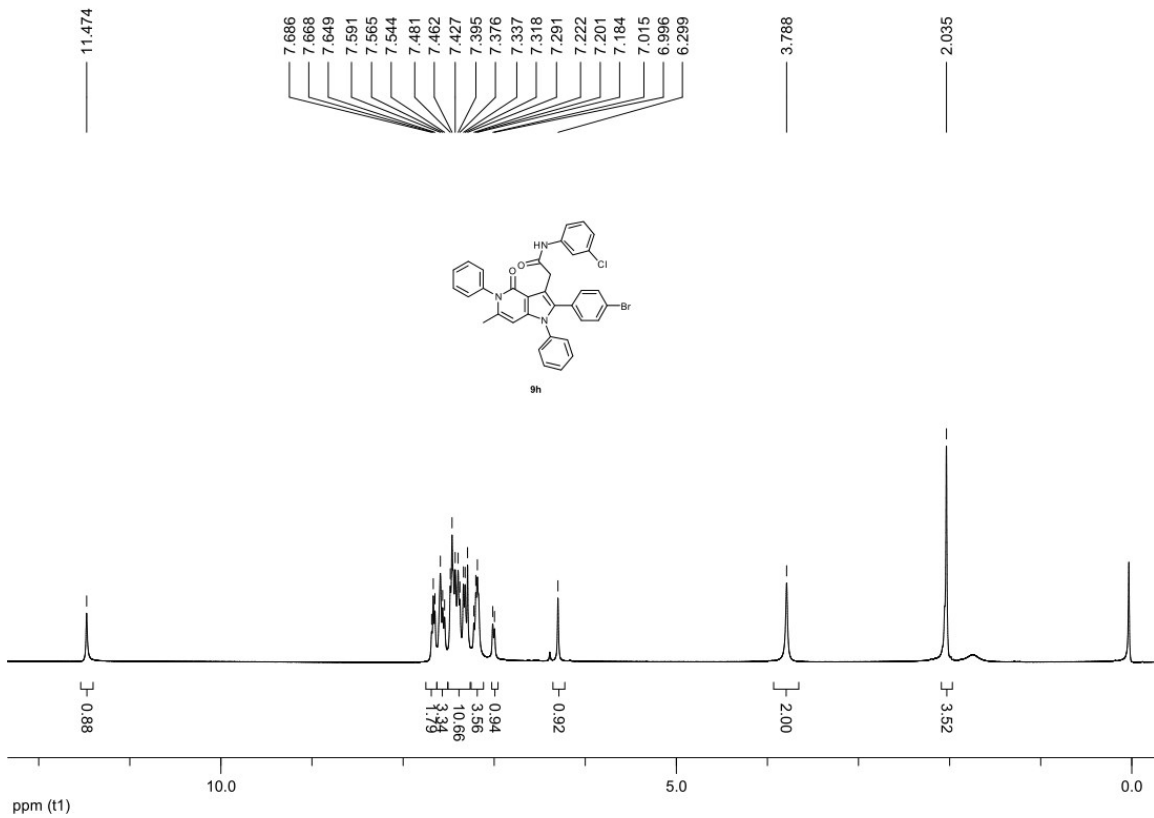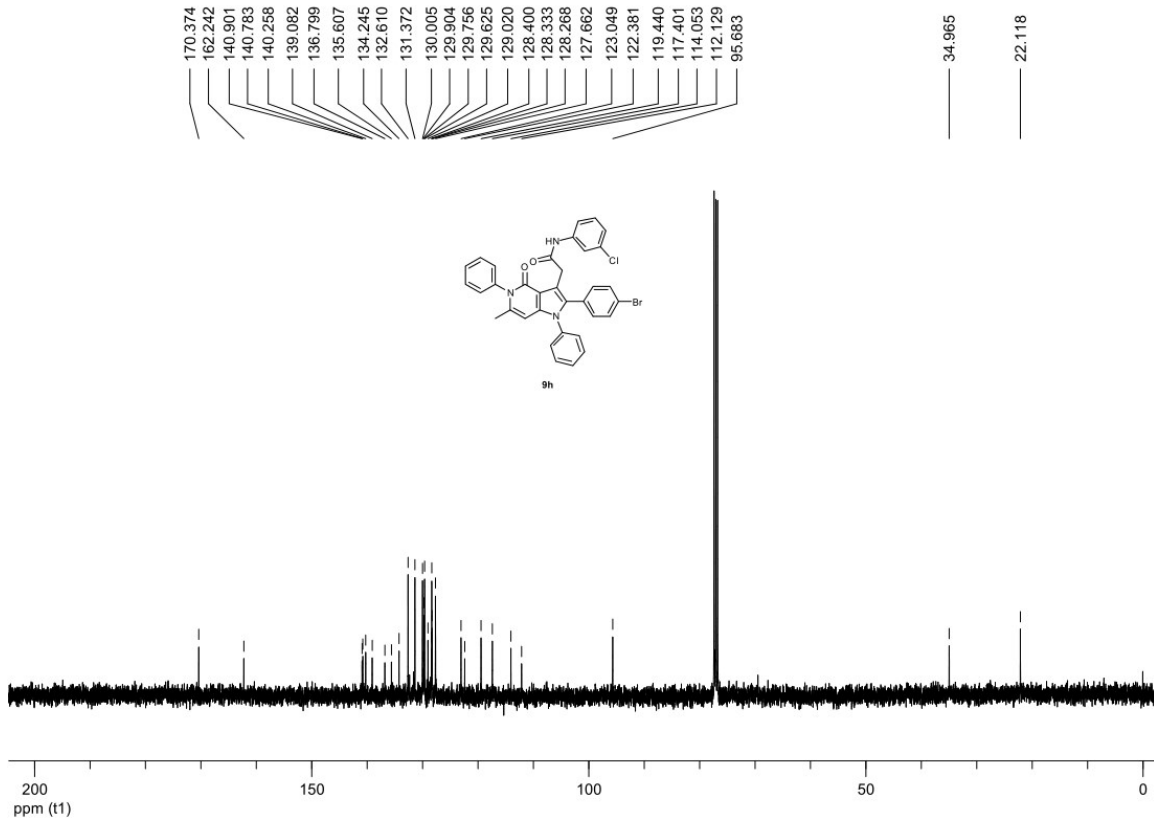

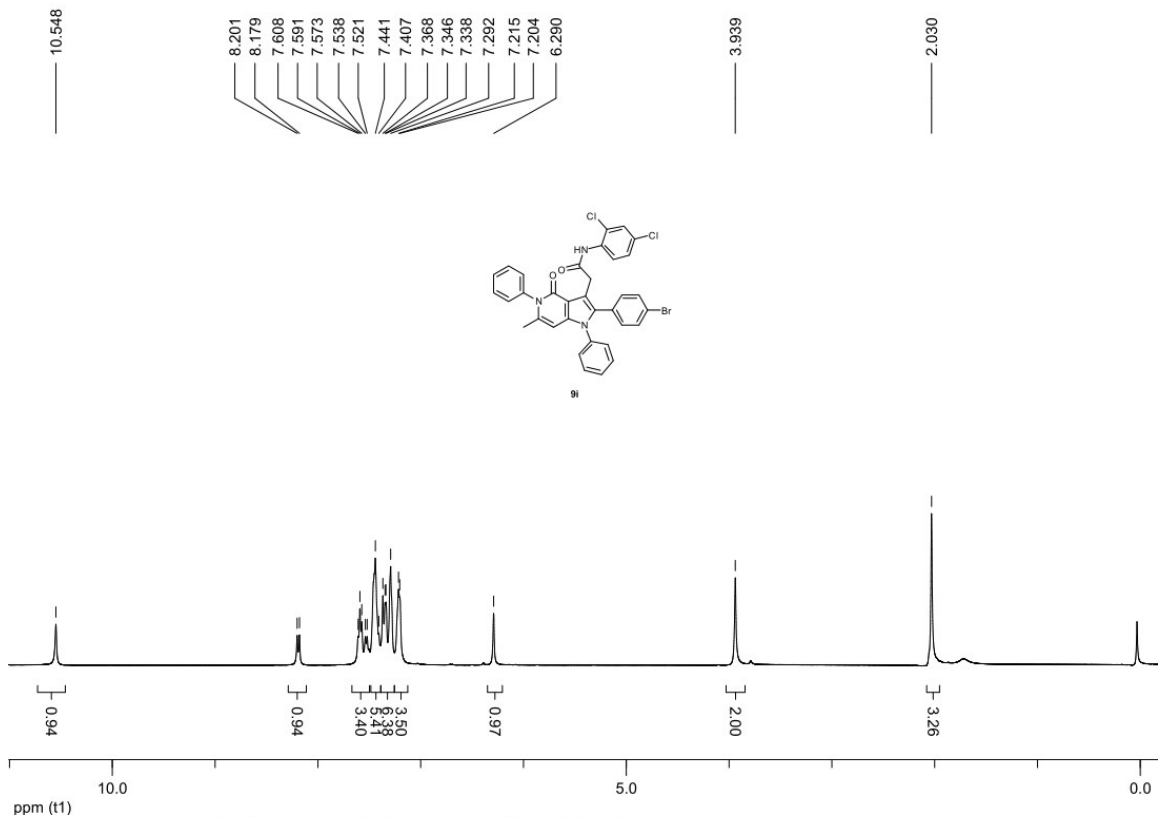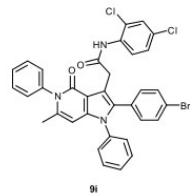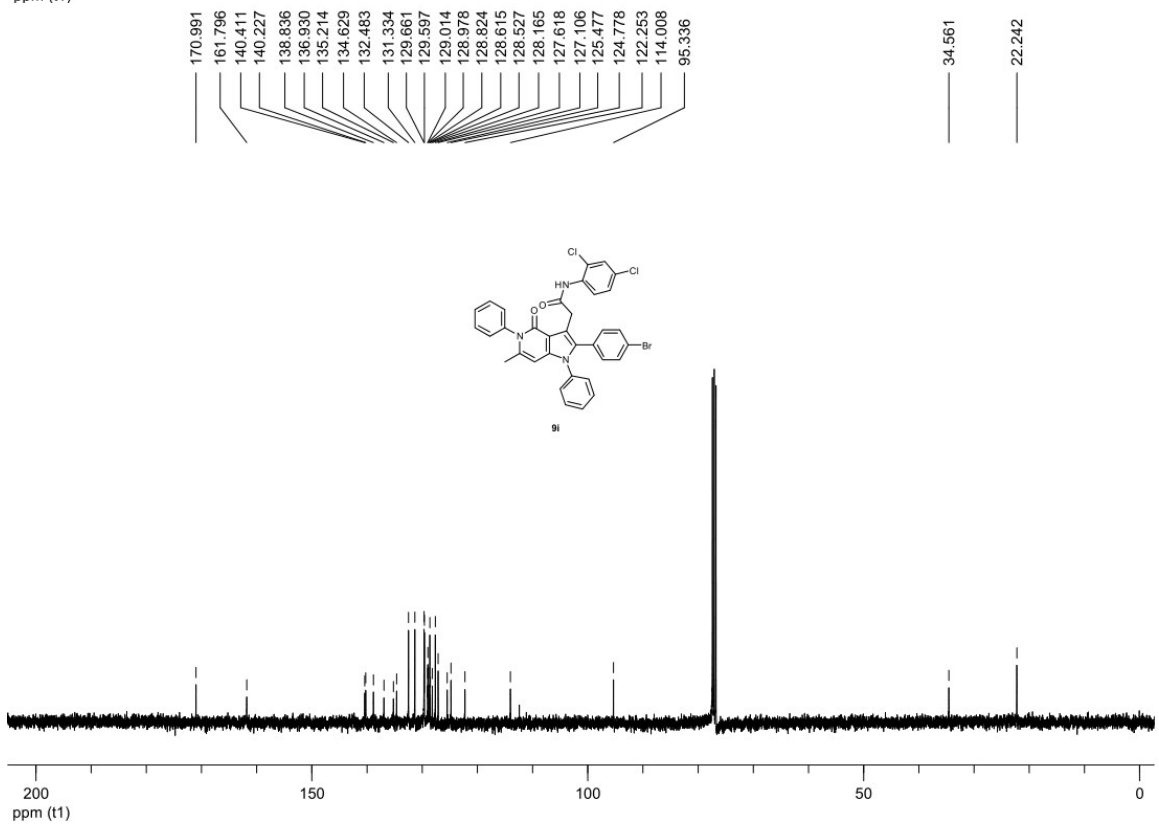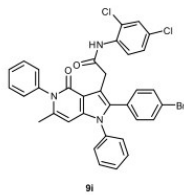

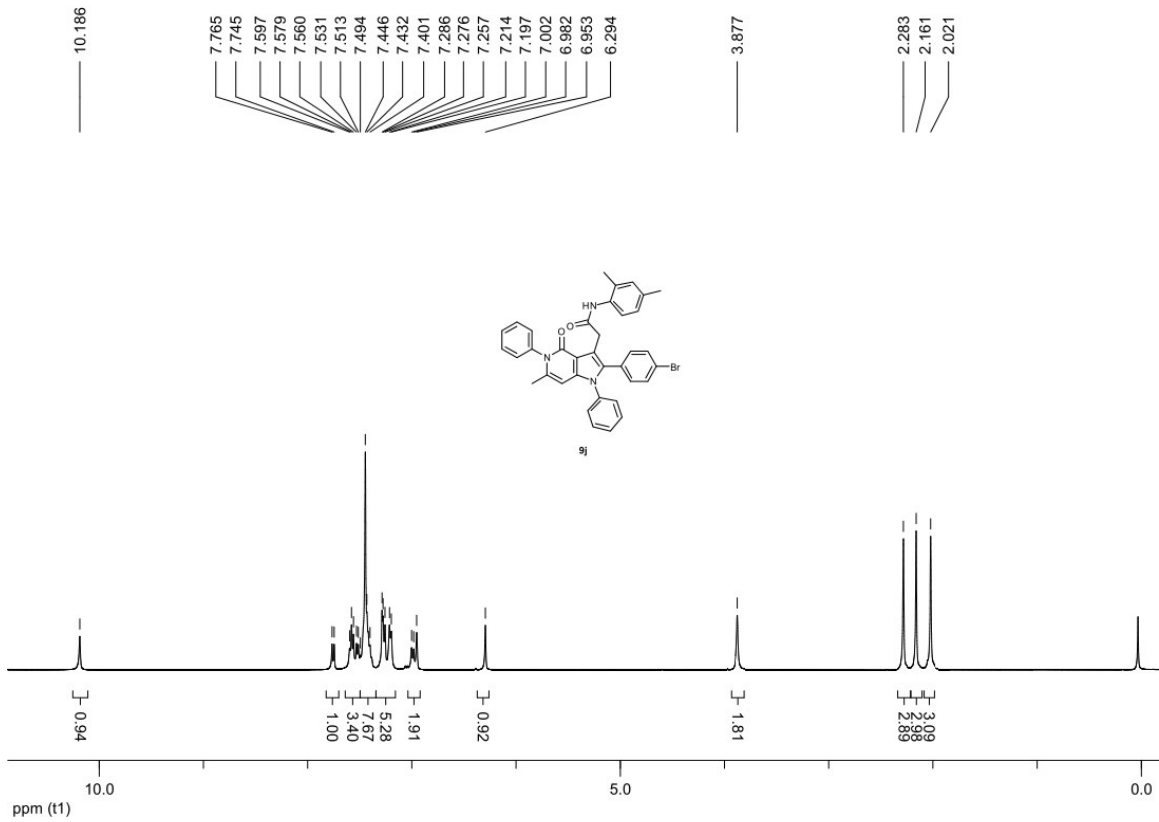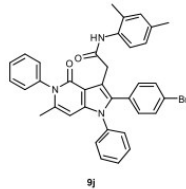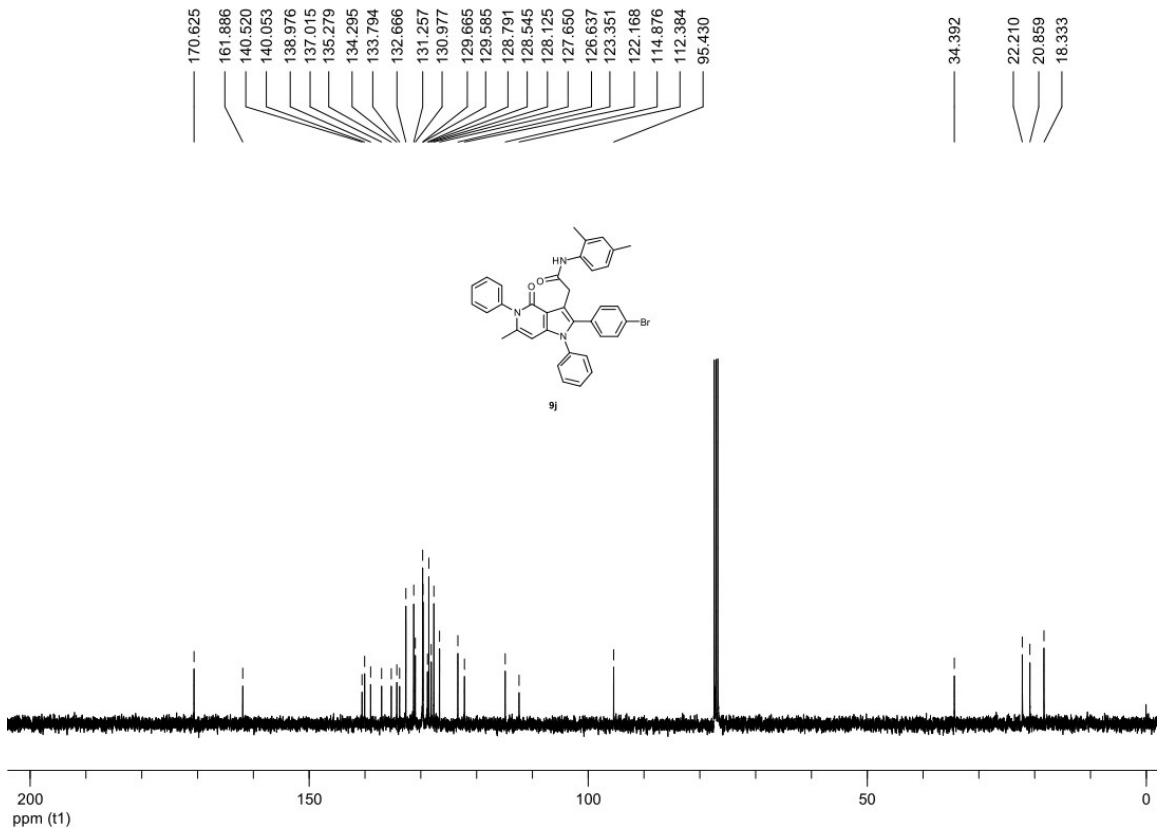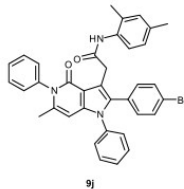

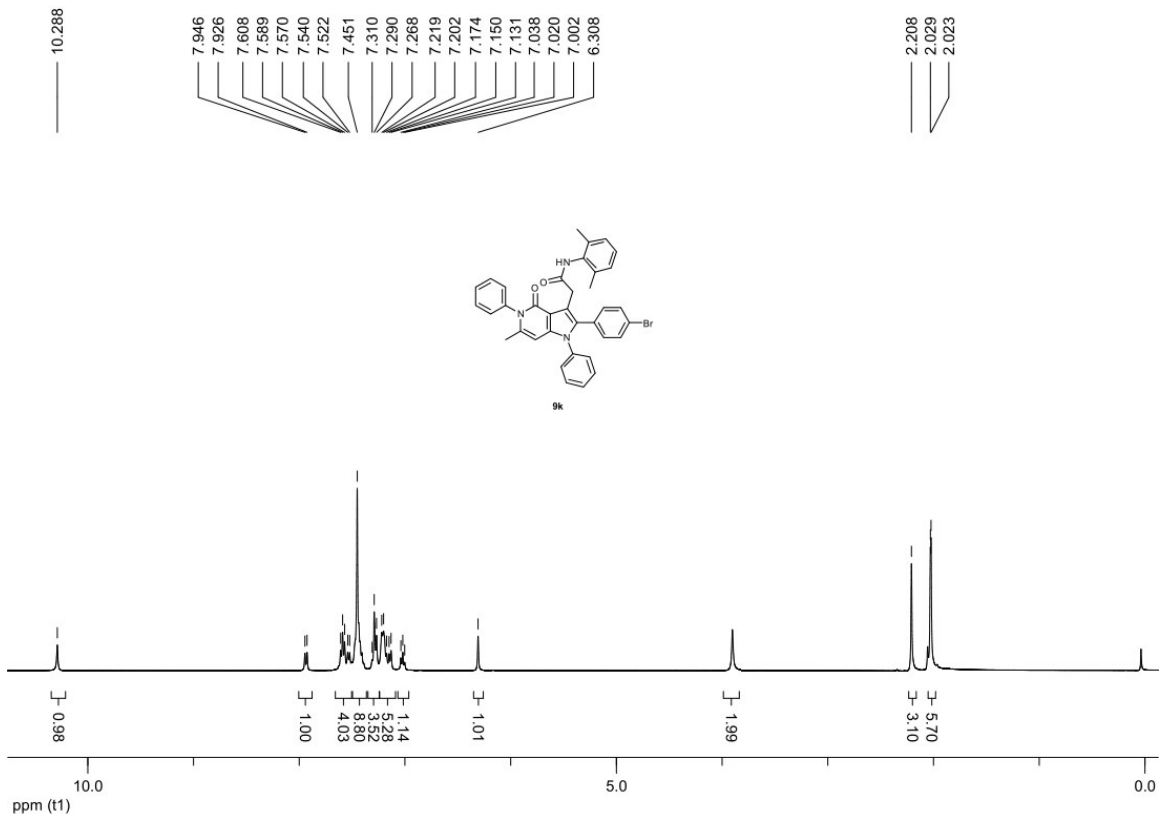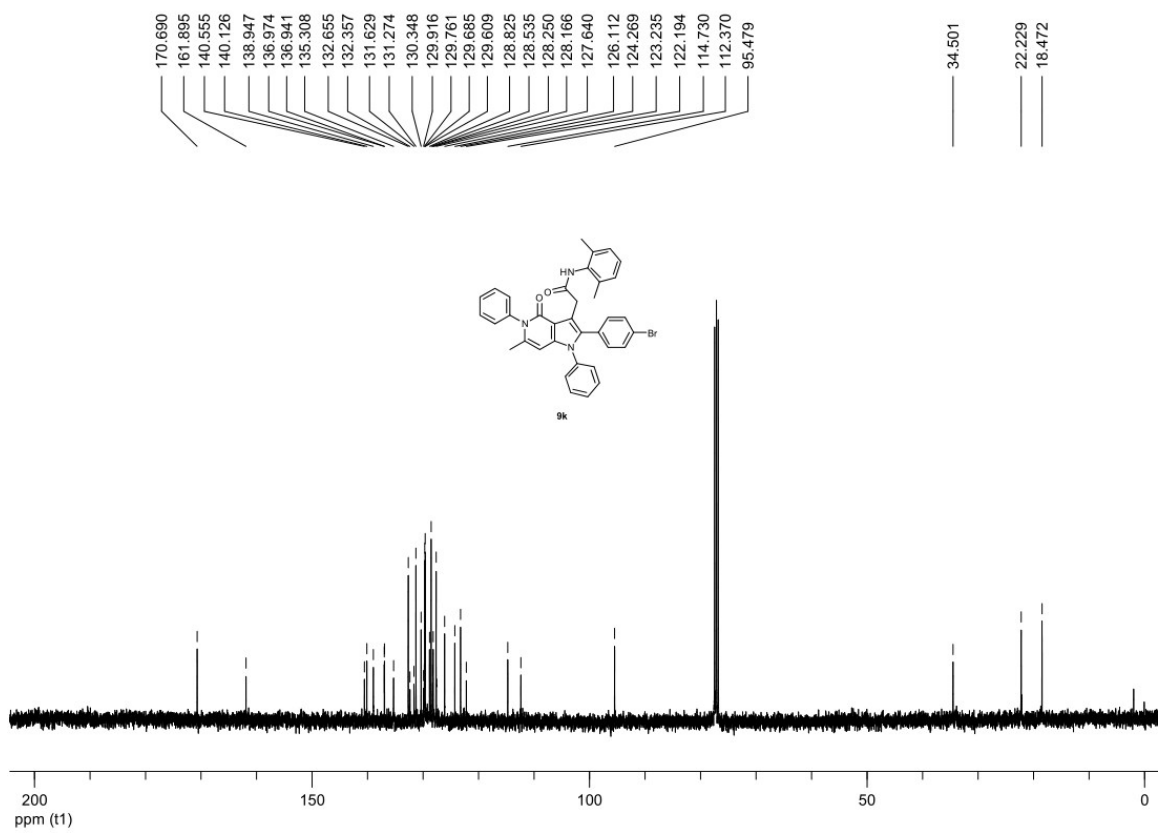

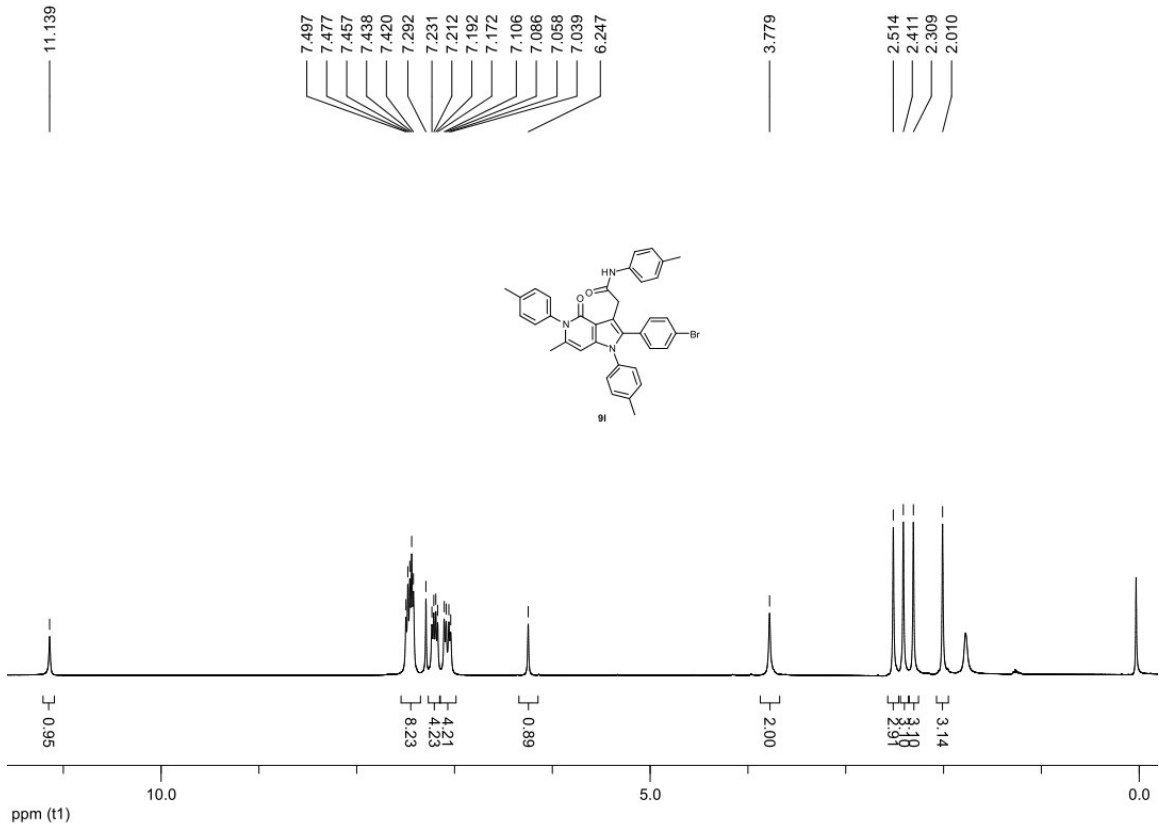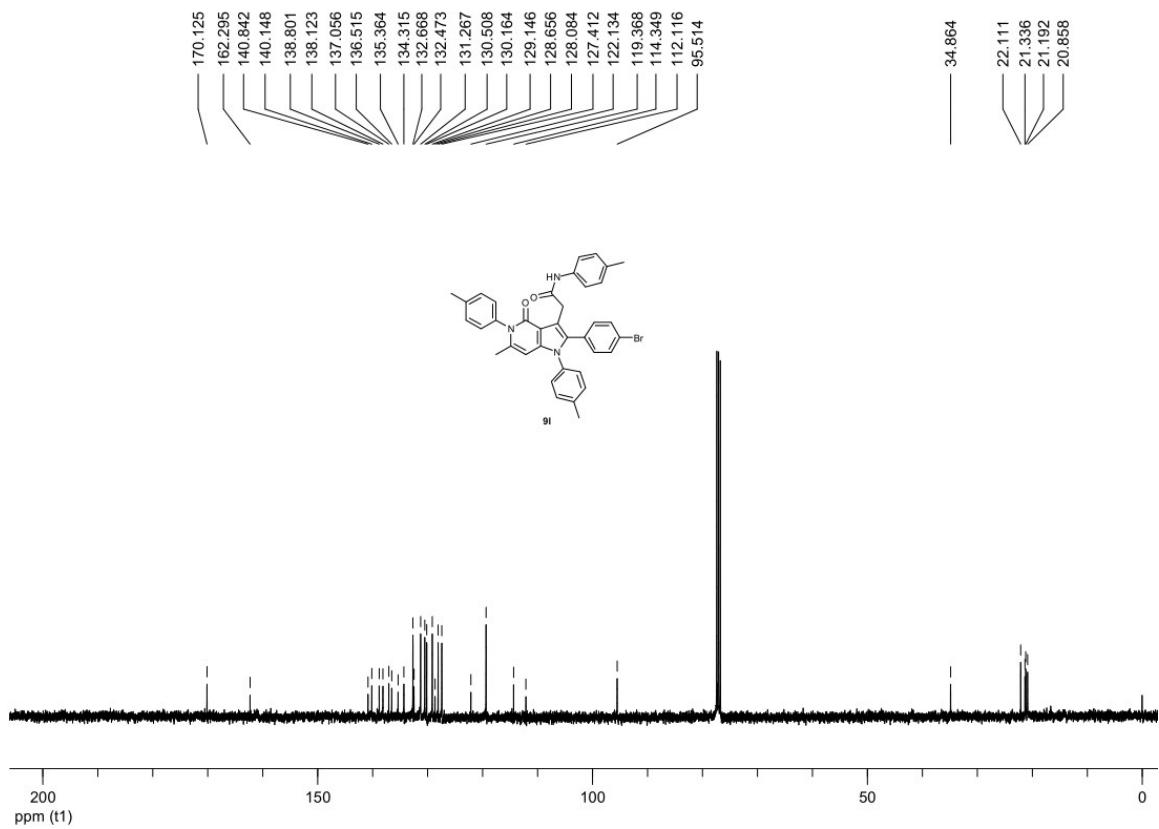

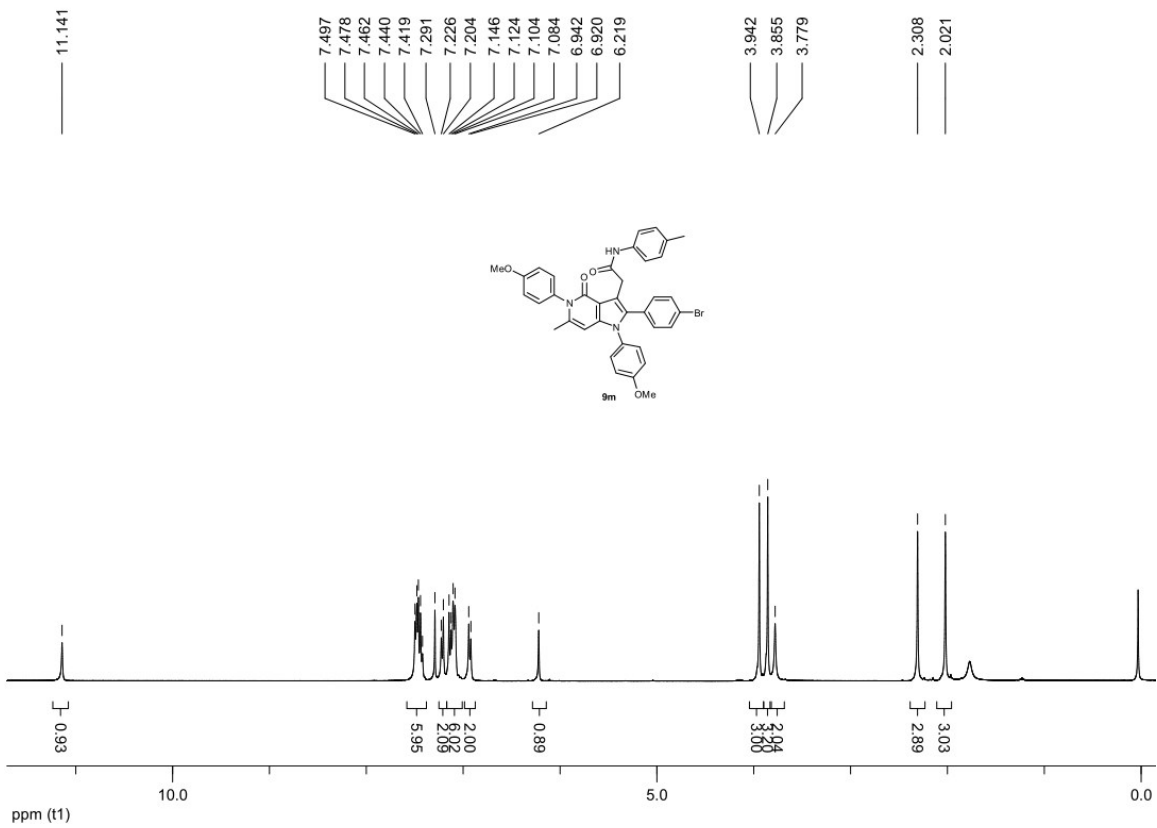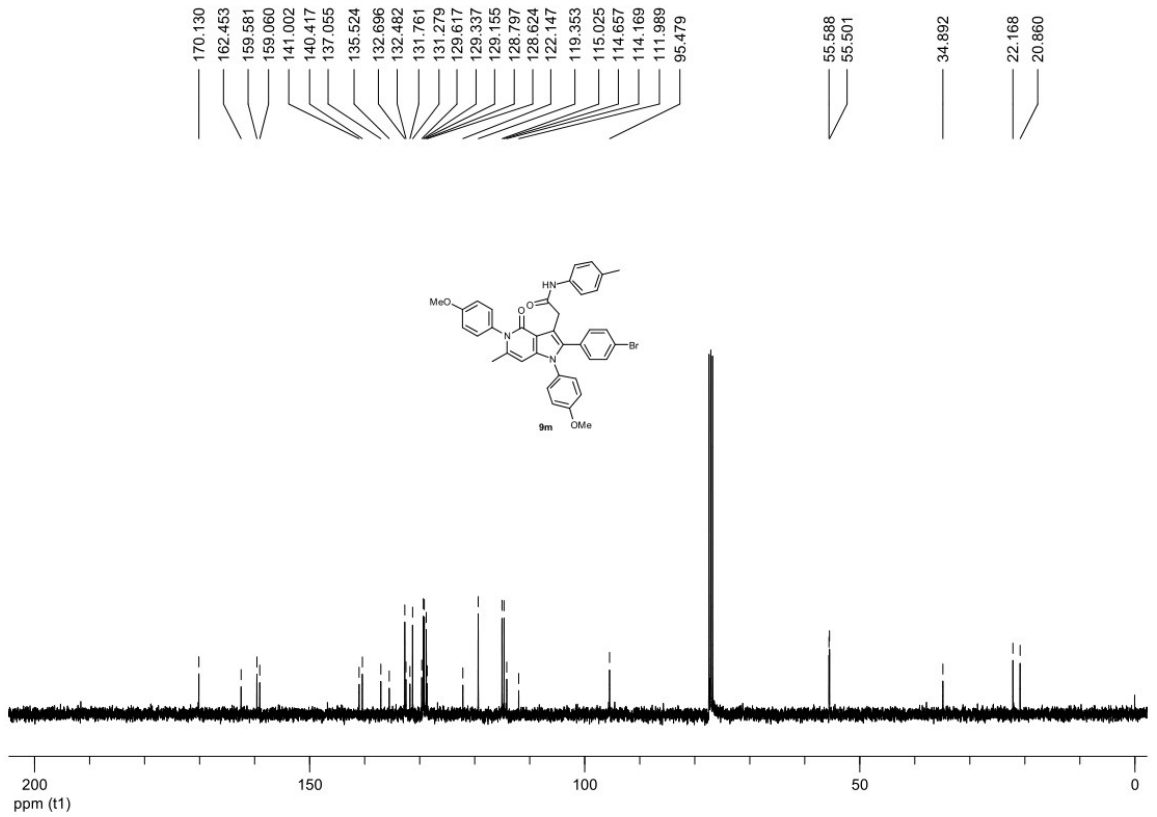

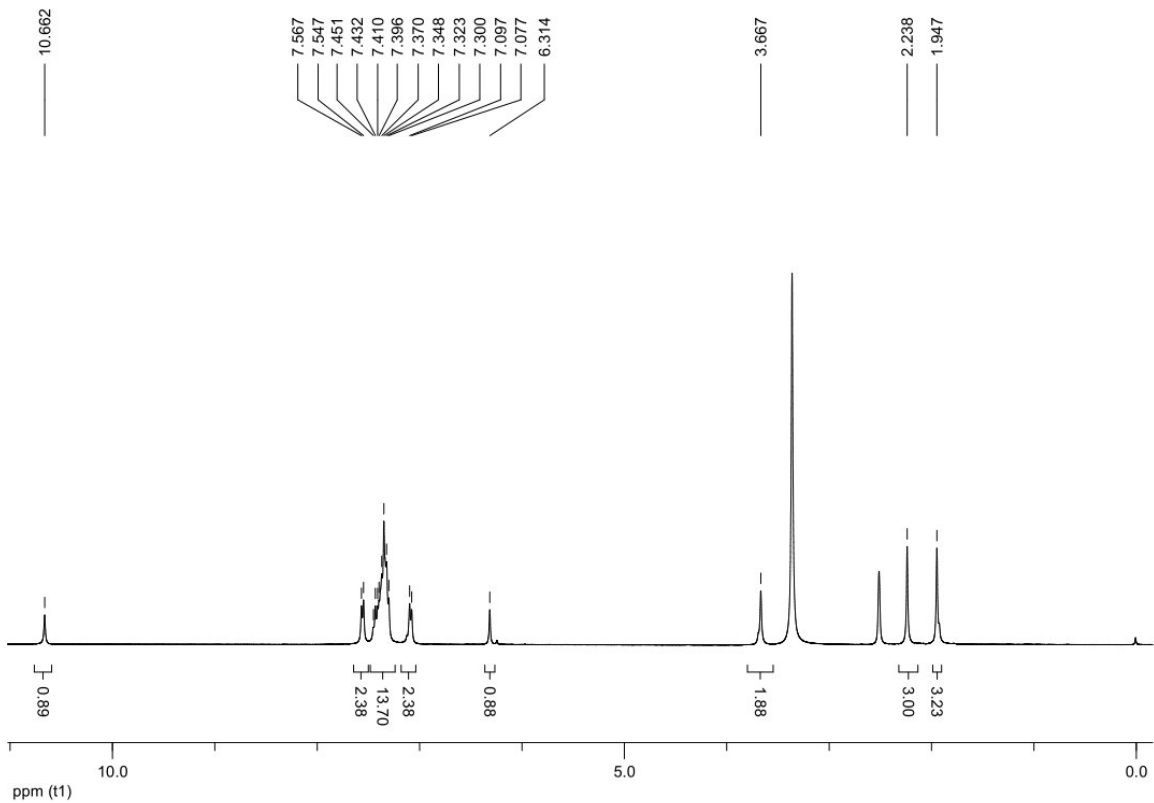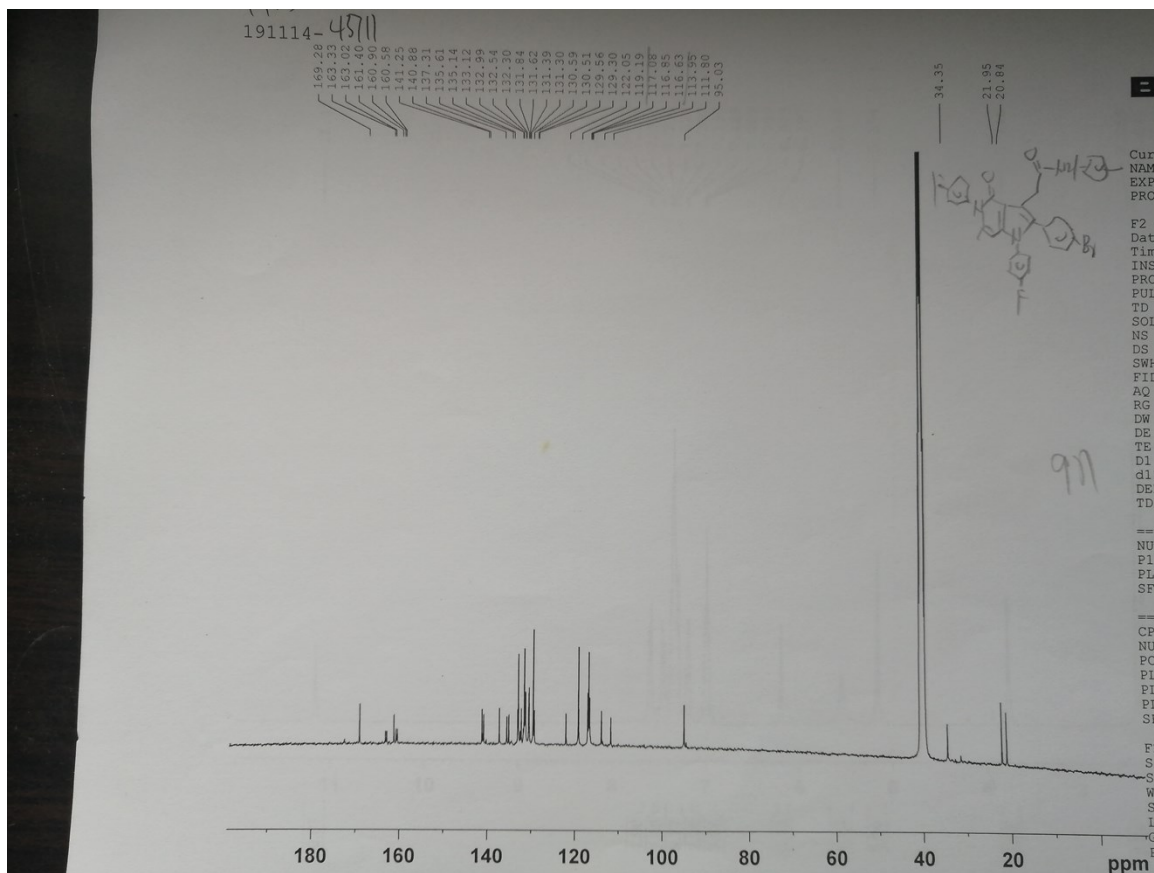



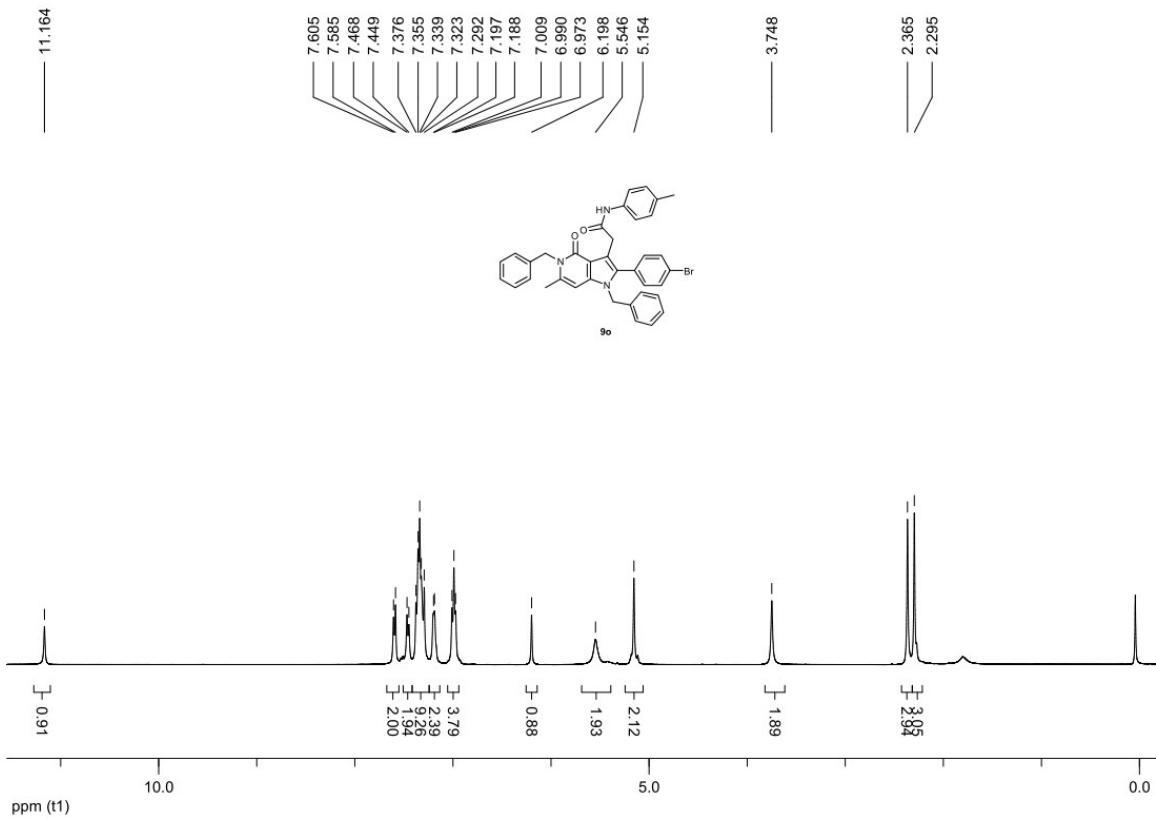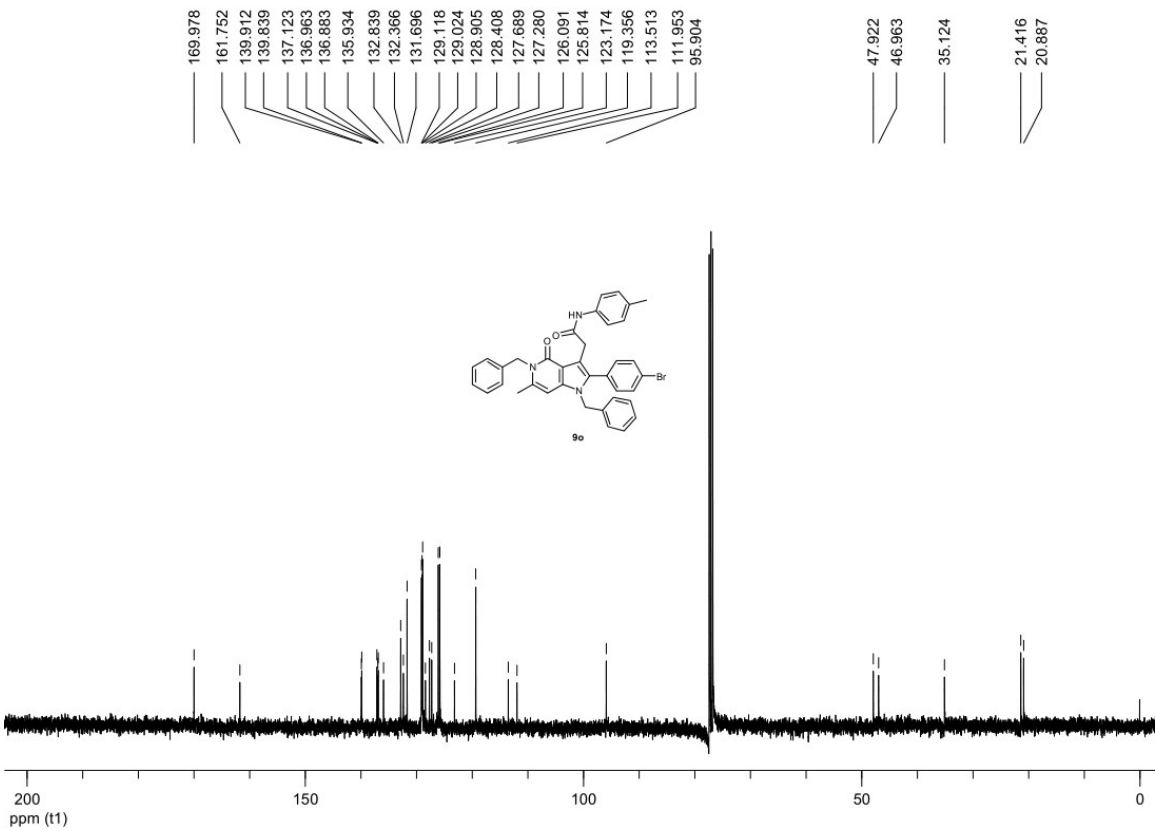

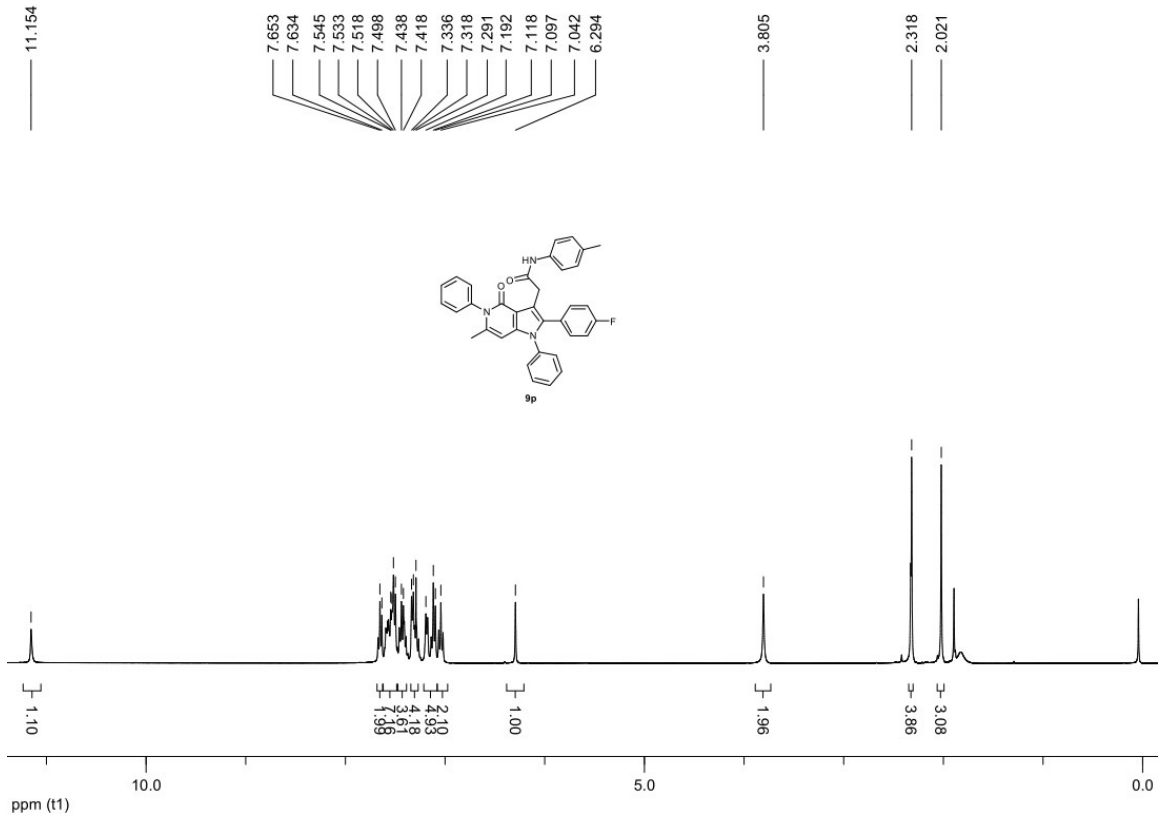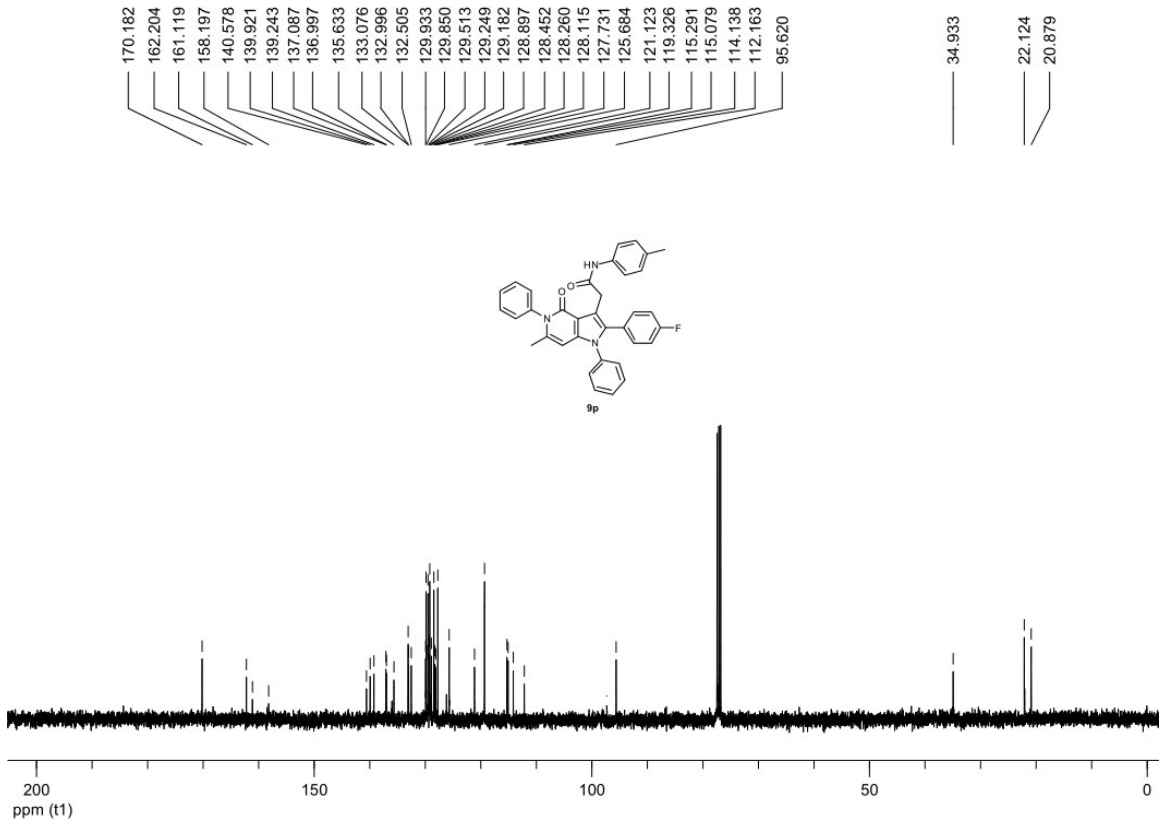

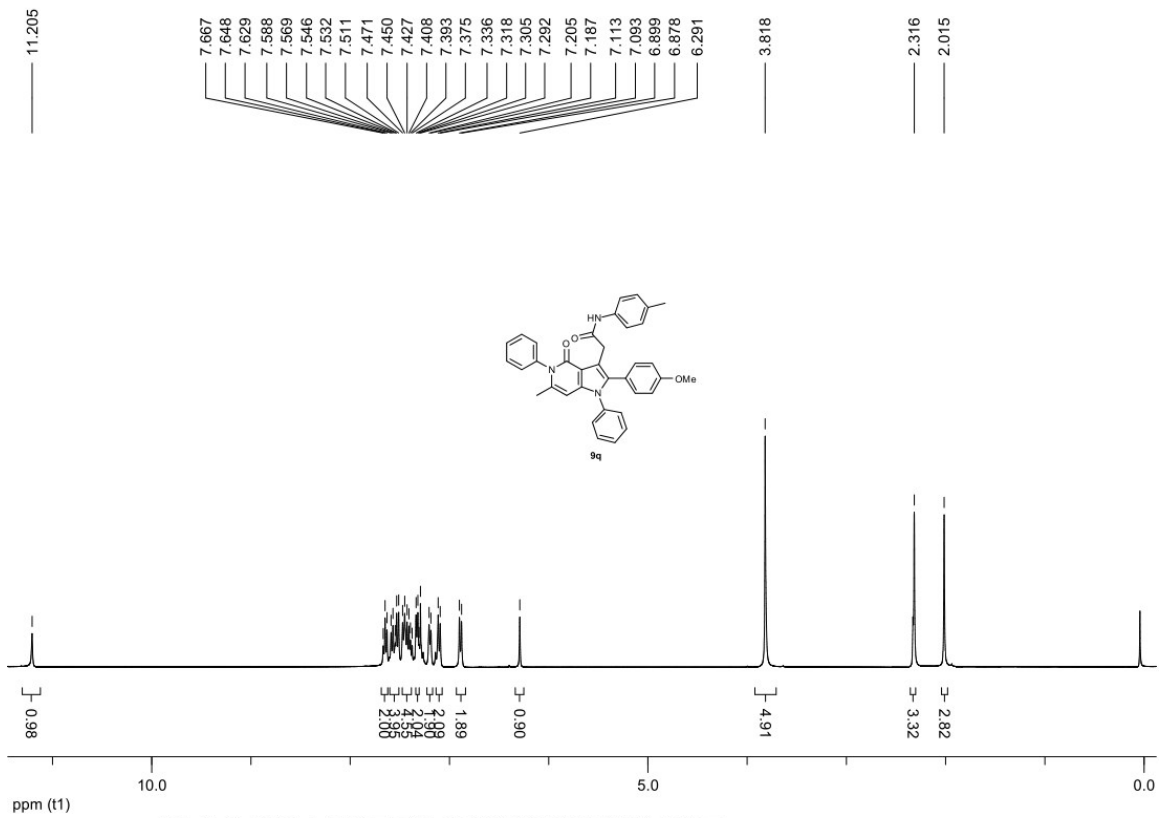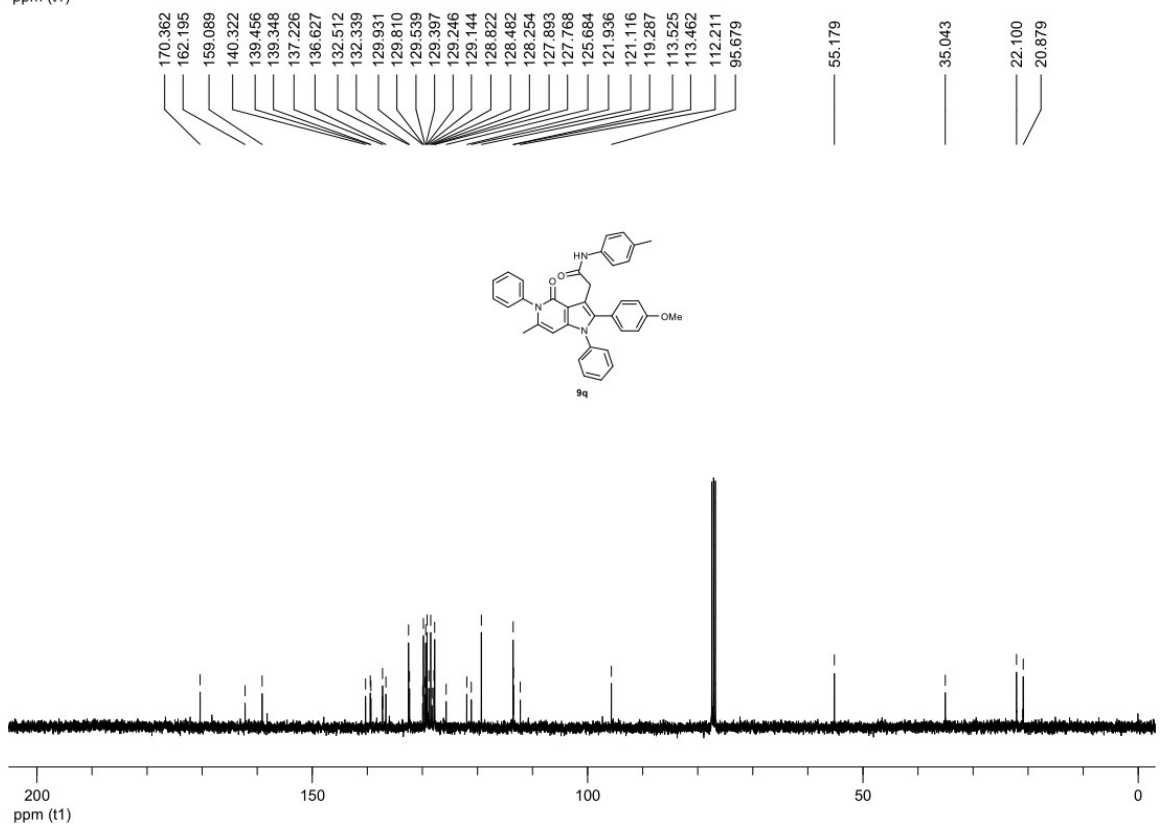

Supplement: d1ob00190f1.pdf [file d1ob00190f1.pdf]
